# Supplementary material for: Health promotion and cardiovascular risk reduction in people with spinal cord injury: physical activity, healthy diet and maintenance after discharge— protocol for a prospective national cohort study and a preintervention- postintervention study
Source: PubMed Central journal article supplement — BMJ Open. 2019 Dec 31;9(12):e030310. doi: 10.1136/bmjopen-2019-030310 (PMC6955524; doi:10.1136/bmjopen-2019-030310), 2019-12-31
Supplement: bmjopen-2019-030310.draft_revisions.pdf [file bmjopen-2019-030310.draft_revisions.pdf]

# BMJ Open

BMJ Open is committed to open peer review. As part of this commitment we make the peer review history of every article we publish publicly available.

When an article is published we post the peer reviewers' comments and the authors' responses online. We also post the versions of the paper that were used during peer review. These are the versions that the peer review comments apply to.

The versions of the paper that follow are the versions that were submitted during the peer review process. They are not the versions of record or the final published versions. They should not be cited or distributed as the published version of this manuscript.

BMJ Open is an open access journal and the full, final, typeset and author-corrected version of record of the manuscript is available on our site with no access controls, subscription charges or pay-per-view fees (<http://bmjopen.bmj.com>).

If you have any questions on BMJ Open's open peer review process please email [info.bmjopen@bmj.com](mailto:info.bmjopen@bmj.com)

# BMJ Open

**Health promotion and cardiovascular risk reduction in people with spinal cord injury - physical activity, healthy diet and maintenance after discharge: study protocol for a prospective national cohort study followed by a pre-post intervention study.**

|                               |                                                                                                                                                                                                                                                                                                                                                                                                                                                                                                                                                                                                                                                                      |
|-------------------------------|----------------------------------------------------------------------------------------------------------------------------------------------------------------------------------------------------------------------------------------------------------------------------------------------------------------------------------------------------------------------------------------------------------------------------------------------------------------------------------------------------------------------------------------------------------------------------------------------------------------------------------------------------------------------|
| Journal:                      | <i>BMJ Open</i>                                                                                                                                                                                                                                                                                                                                                                                                                                                                                                                                                                                                                                                      |
| Manuscript ID                 | bmjopen-2019-030310                                                                                                                                                                                                                                                                                                                                                                                                                                                                                                                                                                                                                                                  |
| Article Type:                 | Protocol                                                                                                                                                                                                                                                                                                                                                                                                                                                                                                                                                                                                                                                             |
| Date Submitted by the Author: | 08-Mar-2019                                                                                                                                                                                                                                                                                                                                                                                                                                                                                                                                                                                                                                                          |
| Complete List of Authors:     | <p>Holm, Nicolaj; Rigshospitalet, Neuroscience Center, Clinic for Spinal Cord Injuries<br/> Møller, Tom; The University Hospitals Centre for Health Research, UCSF Copenhagen University Hospital Rigshospitalet , Department 9701<br/> Adamsen, Lis; The University Hospitals Centre for Health Research, UCSF Copenhagen University Hospital Rigshospitalet , Department 9701<br/> Dalsgaard, Line; Rigshospitalet, Neuroscience Center, Clinic for Spinal Cord Injuries<br/> Biering-Sorensen, Fin; Rigshospitalet, Neuroscience Center, Clinic for Spinal Cord Injuries<br/> Schou, Lone; University College Copenhagen, Department of Nursing and Nutrition</p> |
| Keywords:                     | Spinal Cord Injuries, Metabolic Syndrome, Health Promotion, Exercise, Diet Therapy                                                                                                                                                                                                                                                                                                                                                                                                                                                                                                                                                                                   |
|                               |                                                                                                                                                                                                                                                                                                                                                                                                                                                                                                                                                                                                                                                                      |

SCHOLARONE™  
Manuscripts

**TITLE PAGE**

Health promotion and cardiovascular risk reduction in people with spinal cord injury - physical activity, healthy diet and maintenance after discharge: study protocol for a prospective national cohort study followed by a pre-post intervention study.

Authors:

Nicolaj Jersild Holm ([nicolaj.jersild.holm@regionh.dk](mailto:nicolaj.jersild.holm@regionh.dk)), Tom Møller ([tom@ucsf.dk](mailto:tom@ucsf.dk)), Lis Adamsen ([la@ucsf.dk](mailto:la@ucsf.dk)), Line Dalsgaard ([line.trine.dalsgaard@regionh.dk](mailto:line.trine.dalsgaard@regionh.dk)), Fin Biering-Sørensen ([fin.biering-soerensen@regionh.dk](mailto:fin.biering-soerensen@regionh.dk)), Lone Helle Schou ([lohs@kp.dk](mailto:lohs@kp.dk))

Keywords: Spinal Cord Injuries, Metabolic Syndrome, Health Promotion, Exercise, Diet Therapy

Corresponding Author: Nicolaj Jersild Holm ([nicolaj.jersild.holm@regionh.dk](mailto:nicolaj.jersild.holm@regionh.dk)), phone: +45 38631963, Rigshospitalet, Neuroscience Center, Clinic for Spinal Cord Injuries, Havnevej 25, 3100, Hornbæk, Denmark

Word count: 5.757

Version: 2.1 date: 29.01.19

## ABSTRACT

**Introduction** A spinal cord injury (SCI) and its consequences predispose to s physical inactivity and weight gain and thus death due to cardiovascular diseases is even more frequent among people with SCI compared to the general population. In the literature, consensus is established about an interdisciplinary multimodal approach for prevention and treatment of cardiovascular risk factors including overweight and obesity in people with SCI, focusing on diet, physical activity (PA) and behavioral interventions. This study, focus on how to implement and use multimodal approaches as elements in patient education in a clinical setting, i.e. describing not only the effect of the multimodal intervention but also the effectiveness.

**Methods and analysis** All patients who are 18 years or older, with an SCI within the last 12 months and admitted to highly specialized rehabilitation, are included regardless of etiology to the SCI or neurological level. The project consists of a primary study designed as a controlled pre-post multi modal pragmatic clinical intervention study, designed with 6-months of follow up. A national cohort study on Body Mass Index (BMI) is conducted and serves as historic control. A central part of the intervention in the primary study is to create a new uniform and systematic approach to patient education about cardiovascular risk factors, PA and a healthy diet, in complement to standard rehabilitation. The strategic approaches to cardiovascular risk factors, beginning at the onset of the primary SCI rehabilitation and integrated into the existing setting at predetermined time points throughout the rehabilitation continuum, constitutes the aims for cardiovascular prevention. Outcome measures are collected at admission, discharge and follow-up 6 months after discharge and includes measures of VO<sub>2</sub>peak (primary outcome), BMI, body composition, metabolic profile, neurologic status, level of functioning, depression, quality of life, objective PA (accelerometry), self-reported PA, self-assessed ability to be physically active, shared decision making, and measurement of dietary habits. In relation to VO<sub>2</sub>peak, the test- retest reliability of four different test protocols will be investigated in a clinical context. Likewise the test-retest reliability of a multisensor accelerometer in a clinical rehabilitation setting will be investigated.

## Ethics and dissemination

Informed consent is retrieved from all participants by the principal investigator. The interventions in the project are closely related to the content of the present rehabilitation, and the risk of pain and discomfort is considered modest. Any unintended events related to the elements of the intervention are reported according to existing regional procedures. Data is stored in a web-based database (Redcap) with limited access and ID-code. The prospective cohort study and the primary study in the project are registered at Clinicaltrials.gov. Attempts to publish positive and negative results in relevant scientific journals concerning SCI will be made. Important protocol modifications are reported to the Committees on Health Research Ethics in the Capital Region of Denmark.

1  
2  
3  
4  
5  
6  
7  
8  
9  
10  
11  
12  
13  
14  
15  
16  
17  
18  
19  
20  
21  
22  
23  
24  
25  
26  
27  
28  
29  
30  
31  
32  
33  
34  
35  
36  
37  
38  
39  
40  
41  
42  
43  
44  
45  
46  
47  
48  
49  
50  
51  
52  
53  
54  
55  
56  
57  
58  
59  
60

## Registration details

The project is approved by the Committees on Health Research Ethics in the Capital Region of Denmark on 10.07.2018 (Journal-nr.: H-18018325) and the Danish Data Protection Agency (j.nr. VD-2018-380, I-Suite nr.: 6631) and (RH-2017-345, I-Suite nr.: 06052). The project is registered at Clinicaltrials.gov (NCT03689023) and (NCT03369080). See the World Health Organization Trial Registration Data Set in table 1.

## Article summary

### Strengths and limitations of this study

It is a strength that the cohort study on BMI is representative and includes both SCI-centers in Denmark and the intervention study includes all newly injured people with SCI admitted to rehabilitation at the East Denmark SCI-center.

It is a strength that several predefined protocols for assessing VO<sub>2</sub>peak in a clinical setting are used due to the heterogeneity of the functional level in the SCI population.

It is a strength that the controlled intervention study is based on a pragmatic real-life approach by including existing settings and work flows to a large extent.

It is a limitation however, that the controlled intervention study is based on a pragmatic real-life approach whereby the implementation of multimodal interventions may be challenged due to changes in the clinical setting.

It is a limitation that the intervention study is not randomized .

## INTRODUCTION

The incidence of traumatic spinal cord injury (SCI) in Denmark is 10-15/mill. annually [1], while non-traumatic SCI in recent years has constituted approximately 60% of all newly injured admitted to the two SCI-centers in Denmark. It is a life changing event that may affect all bodily functions below the level of lesion with significant costs for the individual and society and requires highly specialized interdisciplinary rehabilitation aiming at the highest possible level of independent functioning. The rehabilitation at Clinic for Spinal Cord Injuries in Eastern Denmark (CSCI) generally includes functional training, strength training, cardiovascular exercise and fine motor training of the upper extremities. Moreover, continuously assessment and action is taken in relation to circulation, respiration, thermoregulation, bowel, bladder, skin, pain and spasticity, as well as aids compensating the level of functioning, including communication aids and splinting. Likewise counseling related to social and economic issues, sexual function and psychological issues is provided.

On the long-term, SCI and its impairments predispose to increased cardiovascular risk and premature cardiovascular death, and recently a clinical practice guideline addressing cardiometabolic disease after SCI has been published [2]. However, targeted strategic patient education based on principles that includes an individualized face to face interaction between patients and health care professionals, including individualized counselling on long term cardiovascular risk is not systematically integrated at early stages of specialized SCI rehabilitation at CSCI, although there may be an opportunity at this stage of the

1  
2  
3  
4 rehabilitation to target the link between the injury-related immediate impact on functionality and long-  
5 term health consequences. Likewise, systematic health promotion related to Body Mass Index (BMI), diet,  
6 smoking, alcohol intake and physical activity (PA) is not provided systematically, and assessment of  
7 metabolic profile and body composition is not a part of standard care. A systematic approach related to  
8 health care promotion may ensure that all patients at CSCI receive information and knowledge related to  
9 health promotion and the risk of cardiovascular disease which may support patient adaptation and  
10 adherence to recommended PA and healthy diet.  
11  
12  
13

14 Therefore, the cardiovascular risk factors, including weight gain and consequences of an inactive lifestyle  
15 during and after the primary rehabilitation, defines the primary systematic approach in the current  
16 controlled study and sub-investigations.  
17

### 18 **The course of overweight**

19  
20  
21 The prevalence of overweight in people with SCI is conservatively estimated to 66% and has been found to  
22 be one of the most common cardiometabolic risk factors in people with SCI, and contributes to, and  
23 increases, the cardiovascular risk profile in wheelchair dependent people with paraplegia [3], [4] [5, 6].  
24 Energy expenditure decreases significantly after sustaining a SCI and remains low. Body fat and body  
25 weight, although decreasing in the acute phase, increases in the subacute phase, and a loss of lean body  
26 mass in the lower extremities and trunk respectively has been observed during the first year after injury  
27 [7]. BMI increases gradually during the first years after discharge from the primary rehabilitation [8]. Obese  
28 people with SCI achieve a lower level of functioning during primary rehabilitation than people with normal  
29 weight [9]. Overweight in people with SCI is associated with increased risk of depression, while PA may  
30 contribute to a decreased prevalence of depression and increased quality of life [10, 11].  
31  
32  
33

34 Surveys concerning the course of BMI and body composition during, and after discharge from the primary  
35 rehabilitation, do not exist for people with SCI in Denmark.  
36  
37

### 38 **Impact of physical activity on health and fitness**

39  
40 In the general population PA is associated with beneficial effects on diseases contributing to the metabolic  
41 syndrome, and combined with diet therapy the effect increases [12]. Similar effects of PA among people  
42 with SCI is described previously and greater aerobic capacity is associated with greater cardiovascular  
43 health [13]. Evidence based exercise guidelines for cardiometabolic health in people with SCI recommends  
44 a minimum of 30 minutes of moderate to vigorous aerobic exercise three times weekly to reduce  
45 cardiovascular risk factors [14]. However, participation in leisure time PA and joining sports activities after  
46 discharge from the primary rehabilitation is low in people with SCI [10, 15]. Intra- and extra personal factors  
47 are influencing participation in PA, including self-efficacy related to being physically active [16]. Therefore a  
48 new paradigm is focusing on avoiding inactivity [15]. Descriptions of the amount and intensity of objectively  
49 measured PA in people with SCI is relatively rare and is not known in a Danish setting. Likewise the course  
50 of VO<sub>2</sub>peak during and after discharge from primary rehabilitation is less described.  
51  
52  
53

54  
55 There is a gap in the literature describing the effect of interventions targeting cardiovascular risk reduction.  
56 Thus there seems to be a need for studies describing the effect of interventions in a real clinical setting  
57 through a pragmatic study design, as supplement to studies investigating the effect of interventions in a  
58 homogeneous and standardized setting [17]. Likewise, the course of BMI, body composition, VO<sub>2</sub>peak and  
59  
60

1  
2  
3  
4 amount of PA during and after primary rehabilitation, as well as the associations and interactions between  
5 the risk of depression, quality of life, overweight and PA in a Danish context has not been described  
6 previously.  
7

## 8 **Objectives**

9  
10  
11 This study will investigate the effect of a uniform and systematic institutional strategy in a clinical setting,  
12 incorporating targeted strategic patient education about cardiovascular risk factors, PA and a healthy diet  
13 lifestyle initiated early in the primary rehabilitation process, compared to a historic control.  
14

## 15 **STUDY DESIGN**

16  
17  
18 The study consists of a primary study designed as a controlled pre-post multi modal pragmatic clinical  
19 intervention study, with 6-months of follow up and a historic control conducted as a prospective cohort  
20 study (fig 1).  
21

### 22 Sub-investigations:

23  
24  
25 BMI is considered a high risk determinant due to the impact of overweight on the cardiovascular risk profile  
26 and level of functioning in wheelchair dependent people with SCI [3], [4] [5, 6]. Therefore, a prospective  
27 representative longitudinal national survey of BMI is conducted in collaboration with SCI Center of Western  
28 Denmark, before the onset of the controlled intervention, and serves as historic control (sub-study 1).  
29 Additional objective outcomes measures will be collected at CSCI during the historic survey period including  
30 measures of PA, physical capacity and body composition. Accordingly, two sub-studies regarding test –  
31 retest reliability of a VO2 peak test (sub study 2) and a multi sensor accelerometer (sub study 3)  
32 respectively will be performed for two reasons. First, VO2 peak and accelerometry are considered valid  
33 methods to measure the effect, amount and intensity of PA at discharge from the primary SCI  
34 rehabilitation. Secondly, these measures will be collected repeatedly during the prospective controlled  
35 intervention study and serve as individual motivational components in the patient-clinician educative PA  
36 communication, besides being outcome measures. For this reason, assessing the test retest reliability of the  
37 two procedures is essential.  
38  
39  
40  
41

## 42 **METHODS AND ANALYSIS**

43  
44 The SPIRIT reporting guidelines are used in the reporting of the clinical trial [18].  
45

### 46 **Patient involvement**

47  
48 A user panel consisting of both newly injured as well as experienced people with SCI was established and  
49 involved in the early phase of the protocol development. All the participants were hospitalized at CSCI  
50 when they were interviewed about their perception of the present health promoting practice at the clinic.  
51 The user panel called for more information in the early phase of rehabilitation about cardiovascular risk, PA  
52 and diet as well as more support and guidance about appropriate diet and being physical active, which is  
53 the main aim of the project. The results of the project will be disseminated to project participants.  
54  
55  
56  
57  
58  
59  
60

## Participants and eligibility criteria

Inpatients who are 18 years or older and injured with SCI within the last 12 months and admitted at CSCI, are included regardless of etiology, being traumatic or non-traumatic, neurological level or completeness<sup>1</sup> of the lesion if informed consent is retrieved. In sub study 1 all newly injured people with SCI admitted at the SCI Centre of Western Denmark are also included. Sub study 1 serves as historic control group and the intervention in the primary study is a part of new standard care. Therefore, randomization or blinding is not appropriate.

Exclusion criteria for the VO<sub>2</sub>peak test includes motor complete SCI (AIS A and B) at C4 level or above, and a need for ventilator. Other exclusion criteria are the presence of decubitus, severe spasticity or musculoskeletal problems considered at risk of aggravation during testing or preventing completion of the test.

Sub study 3 includes a convenience sample of 20 patients aiming at ensuring a broad variation of age, gender, neurological level and completeness of SCI.

**Primary study: A systematic interdisciplinary multimodal intervention which, as a part of usual care, facilitates physical activity, healthy diet and maintenance after discharge through strategic patient education, with the aim of decreasing cardiovascular risk**

This pre-post study includes all patients, 18 years or older, with a new SCI who are admitted at CSCI during a period of 12- 18 months. The study includes a follow up 6 months after discharge from primary rehabilitation.

Approximately 70 patients with a new SCI are admitted to CSCI annually and with a great variation in length of rehabilitation. Therefore, complete data sets from admission to follow up are expected for approximately 50-60 patients during this period.

## Intervention

The multimodal intervention will be an integrated part of usual care during the project period, and all newly injured patients will receive all the multimodal components, or parts of them, dependent on e.g. the level of injury. Rehabilitation of the physical level of functioning and physical capacity (e.g. physiotherapy) will take place unchanged as usual and is a mandatory core component of highly specialized SCI rehabili-

---

<sup>1</sup> The completeness of the injury is graded according to the ASIA Impairment Scale (AIS). AIS is used to determine the degree of motor and sensory function below the level of the SCI. A complete or incomplete injury is defined as absence or presence of sensory and motor function in the most caudal sacral segments. A = sensory and motor complete; B = sensory incomplete without motor function > 3 levels below the motor level of injury on both sides of the body; C = motor incomplete, with preserved motor function below the level of injury and where > 50% of the key muscles below the injury level have a degree < 3 by manual muscle test (MMT); D = motor incomplete with preserved motor function below the level of injury and where > 50% of key muscles below the injury level have a degree > 3 by MMT; E = normal sensory and motor function in all segments.



1  
2  
3  
4  
5  
6  
7  
8  
9  
10  
11  
12  
13  
14  
15  
16  
17  
18  
19  
20  
21  
22  
23  
24  
25  
26  
27  
28  
29  
30  
31  
32  
33  
34  
35  
36  
37  
38  
39  
40  
41  
42  
43  
44  
45  
46  
47  
48  
49  
50  
51  
52  
53  
54  
55  
56  
57  
58  
59  
60

tation, although decisions made by the patient during the rehabilitation about PA may be integrated into the rehabilitation program in order to achieve the patients goals for PA during and after the rehabilitation period.

A central part of the intervention is to create a uniform and systematic approach to targeted strategic patient education of the patients about cardiovascular risk factors, PA and a healthy diet through a systematization of the existing clinical setting and treatment interventions.

In the process of preparing and reorganizing the institutional approach towards addressing cardiovascular risks, *pre-education* of the interdisciplinary health care personnel and peers with SCI, clarifying the roles of each profession in relation to the targeted patient education, are mandatory. Moreover, pocket cards with evidence- based recommendations related to PA, diet and BMI in people with SCI are provided to all health care professionals and peers with SCI. Also, a timeline for systematic targeted approaches during the primary rehabilitation will be illustrated on the pocket card (Fig. 2)

The patients receive information and instructions about PA and healthy diet through targeted strategic patient education based on principles that includes an individualized face to face interaction between patients and health care professionals, while working towards, and improving a specific health related outcome through adherence to the working processes as e.g. lifestyle [19]. The strategic approaches, beginning at the onset of the primary SCI rehabilitation and integrated into the existing setting at predetermined time points throughout the rehabilitation continuum, constitutes the aims for secondary and tertiary cardiovascular prevention.

Targeted strategic patient education of the patients and their relatives is generally carried out by all the health care professions in different educational settings of [20, 21], with a focus on clarifying the importance of PA and a healthy diet. This involves training sessions [22], and feedback on physiological outcome measures and tests, that also serves as motivational tools. Additionally, goal setting meetings, tools for shared decision making [23] [24] [25], and use of mentors with SCI are also integrated as components supporting decision making about PA and healthy diet. BMI and diet is evaluated 3 months after discharge in an outpatient setting (see appendix for a more detailed description of the strategic interventions).

All components of the strategic intervention are offered the patients as a mandatory part of the systematic intervention, ensuring that information and education of the patients is provided and decisions about PA and healthy diet are made. However, the extent to which the patients engage in e.g. decision making and goalsetting about PA and healthy diet is an individual decision. Deciding not to set goals or make decisions about PA and healthy diet, is respected by the interdisciplinary health care professionals in respect of the autonomy of the patient.

Several outcome measures used to evaluate the intervention at admission, discharge and at follow up 6 months after discharge, are also part of the intervention as motivational components and comprises of the following: BMI, body composition measured by Dual- energy X-ray Absorptiometry (DXA), physical capacity (VO<sub>2</sub>peak), PA (Actiheart multisensor accelerometer) and blood samples describing metabolic profile.

### **Sub study 1. Prospective representative national survey of Body Mass Index.**

This study includes all patients with a new SCI hospitalized at CSCI or SCI Center of Western Denmark during a period of 10 months whereby 100 patients are expected to participate. Data concerning BMI, level of functioning (SCIM III) and neurological status (ISNCSCI) are collected at both centers. Patients with a new SCI (within the last 12 months) who are admitted for rehabilitation several months after the time of injury, are also included in the prospective survey, and therefore BMI at the time of injury is collected for all patients at admission to primary rehabilitation from both the patient's medical record and by asking the patient about weight and height at the time of injury. At CSCI, BMI every 6 weeks, quality of life (QoL SCI), depression (PHQ-2)), amount of PA (Leisure Time Physical Activity Questionnaire for people With Spinal Cord Injury (LTPAQ-SCI)) and self- assessed ability to be physically active (ESES) will be collected additionally during this period, at admission, discharge and at follow up 6 months after discharge. A measure for physical capacity (VO<sub>2</sub>peak), and body composition (DEXA) is performed as well at discharge. Data from this sub study serves as a historic control for the Intervention study.

### **Sub study 2. Test-retest reliability of a VO<sub>2</sub> peak test**

This study includes all patients participating in sub study 1 who are able to perform the test at discharge from primary rehabilitation. The patients are allocated by randomization to a test session of either intra- or interrater reliability. Four different pre -defined exercise protocols are used, due to the complexity of a SCI, in order to reach pre-defined criteria for VO<sub>2</sub>peak. For people with an incomplete SCI, a seated cross-trainer is used (NuStep T5XR<sup>®</sup>) with an incorporated standard, as well as modified, test protocol in the equipment software. Equipment and modified protocol is reliable in people with traumatic brain injury and has been validated in healthy persons [26, 27]. In people with an incomplete SCI the equipment is safe and involves a large amount of muscle mass ensuring completion of the test [28]. In case the equipment and protocols are too difficult for people with a complete tetraplegia, paraplegia or very deconditioned patients, which may hinder reaching VO<sub>2</sub>peak, an arm cranking ergometer will be used (SCI FIT Pro1<sup>®</sup>). The test protocols used on the SCI FIT arm ergometer is established from the most common protocols for people with tetra- and paraplegia during rehabilitation, reported in a recent systematic review [29]. If predefined criteria for VO<sub>2</sub>peak are not reached at test 1, a more suitable protocol is chosen for test 2 in order to reach VO<sub>2</sub>peak and retested at test 3. The test-retest study takes place at discharge, separated by 48 hours or within maximum 5 days between tests at the same time of the day. The participants refrain from caffeine, alcohol and intensive physical exercise on the day of testing as well as tobacco smoking two hours before the test. Bladder emptying is to be performed before the test.

### **Sub study 3. Test-retest reliability of a multi censor accelerometer.**

This study includes a convenience sample of 20 patients ensuring a representative sample of individuals with para- and tetraplegia, complete and incomplete injuries, age and gender. The equipment used for monitoring amount and intensity of PA consists of sensors registering acceleration and heart rate and is placed on the thorax of the participant with two surface electrodes. The equipment has previously been used in wheelchair dependent people with SCI, although the reliability of the equipment in an inpatient setting has not previously been assessed [30]. The precision of the equipment is higher when calibrated

1  
2  
3  
4 individually to the participant using measures of energy expenditure during rest and during an exercise  
5 testing whereby heart rate is retrieved as well. [31]. In this study the individual calibration will be made in  
6 relation to the VO<sub>2</sub>peak test, and continuous measurements of amount and intensity of PA will be made  
7 during a period of 48 hours. The test-retest is performed over a period of two weeks on identical days of  
8 the week in order to ensure comparability.  
9  
10

## 11 **Outcome measures**

12 Outcome measures evaluating the intervention comprises of the following.

### 13 Primary outcome

14 *Oxygen uptake:* Is measured as VO<sub>2</sub>peak during a maximal exercise test and is gold standard for measuring  
15 aerobic capacity. For people with a SCI several test protocols have been used [36].  
16

### 17 Secondary outcomes

18 *Objective PA:* Is measured in a sub-sample in the historic control cohort and the participants in the  
19 intervention study with a multisensor device (Actiheart®) recording accelerations and heart rate. It  
20 is previously used for wheelchair users with SCI and individual calibration is important to get the  
21 most accurate data [31]. Individuals with SCI should participate in at least 150 minutes of physical  
22 exercise per week, according to their ability, beginning as soon as possible following acute spinal cord  
23 injury. When individuals with SCI are not able to meet these guidelines, they should avoid inactivity [2].  
24  
25

26 *Bodyweight:* Is measured as BMI which is the most widely used outcome measure for measuring  
27 bodyweight in people with SCI. BMI is not sensitive enough to distinguish between fat mass and lean body  
28 mass nor overweight in people with SCI. The cut-off for overweight in adult people with SCI is >22kg/m<sup>2</sup>  
29 [32] [2]. BMI is already collected as part of the existing routines and data for BMI every 6 weeks until  
30 discharge will be included in the project.  
31

32 *Body composition:* Is determined by Dual energy x-ray absorptiometry (DXA) which is gold standard for  
33 assessing obesity and body composition. In people with SCI, adult men with >22% bodyfat and adult  
34 women with >35% bodyfat should be classified as obese [2].  
35

36 *Metabolic profile:* Consists of CRP as a marker for inflammation, lipid profile describing Total cholesterol,  
37 Triglycerides, HDL cholesterol and LDL cholesterol which are all included in the International SCI Endocrine  
38 and Metabolic Function Basic Data Set. Triglycerides should not exceed  $\geq 150$  mg/dL (1.7 mmol/L). HDL  
39 cholesterol should not be less than 40 mg/dL (1.03 mmol/L) in men and less than 50 mg/dL (1.29 mmol/L)  
40 in women [2]. LDL cholesterol should not exceed 3,0 mmol/l [33]. Hemoglobin A1c serves as a marker for  
41 carbohydrate metabolism and is included in the International SCI Endocrine and Metabolic Extended Data  
42 Set [34, 35]. Criteria for the diagnosis of pre-diabetes include A1C 5.7 to 6.4% (39 to 47 mmol/mol) and for  
43 diabetes the criteria include A1C >6.5% (48 mmol/mol) [2]. According to the approval by the Committees  
44 on Health Research Ethics in the Capital Region of Denmark, blood samples will not be stored after analysis.  
45  
46

47 *Blood pressure (BP):* Hypertension in people with SCI varies depending on the injury level, severity and  
48 etiology. BP should not exceed  $\geq 130/85$  mm Hg.  
49  
50  
51  
52  
53  
54  
55  
56  
57  
58  
59  
60

1  
2  
3  
4  
5  
6  
7 *Level of functioning:* Is determined by the Spinal Cord Injury Independence Measure III (SCIM III) which is a  
8 valid and reliable outcome measure designed to assess level of functioning in people with SCI in a clinical  
9 setting and in research [36] [37, 38] [39].  
10

11 *Neurologic status:* Is determined by the International Standards for Neurological Classification of Spinal  
12 Cord Injury (ISNCSCI) and is the most widely used classification in people with SCI [40, 41].  
13

14 *Depression:* Is measured by the Patient Health Questionnaire- 2 (PHQ-2) which is a generic outcome  
15 measure for measuring depression. In people with SCI a cut-off score of 3 is associated with a sensitivity of  
16 83,3% and specificity of 95,7% [42].  
17  
18

19 *Quality of Life:* Is measured by the International SCI Quality of Life Basic Data Set (QoL SCI) which consists of  
20 three questions regarding satisfaction with life in general as well as physical and mental health. It is a valid  
21 outcome measure with good internal consistency [43] [44].  
22  
23

24 *Self - reported PA:* Is measured by the Leisure Time Physical Activity Questionnaire for people with SCI  
25 (LTPAQ-SCI) which is a self- administered questionnaire concerning leisure time PA, including amount and  
26 intensity the past 7 days. Reliability and validity of the self- reported activity level is satisfactory in the  
27 moderate and high intensity area [13]. An additional question concerning PA beyond leisure time PA (i.e. PA  
28 as part of the rehabilitation) is added in sub-study 1. The question is designed as the original questions and  
29 the same intensity scale is used. During the intervention study a version of LTPAQ-SCI adjusted to a Danish  
30 context will be used. This version is approved by the developers of the original LTPAQ-SCI and includes  
31 active transportation and active physiotherapy.  
32  
33  
34

35 *Self-assessed ability to be physically active:* Is measured by the Exercise Self Efficacy Scale for people with  
36 SCI (ESES). It is an outcome measure developed for assessing self-efficacy related to PA in people with SCI  
37 and consists of 10 questions which are answered on a 0-4 scale. ESES is reliable with a high internal  
38 consistency (Cronbach`s alpha 0.94). Also content validity in the form of face and construct validity are  
39 satisfactory [45].  
40  
41

42 *Measure of shared decision making related to patient decision aids for PA and healthy diet:*  
43

44 Is measured by the 9-item Shared Decision Making Questionnaire (SDM-Q-9) and describes the process of  
45 Shared Decision Making between health care professionals and the patient from the patient's perspective.  
46 SDM-Q-9 consists of nine statements, which can be rated on a six-point scale from "completely disagree"  
47 (0) being the worse score to "completely agree" (5) being the best score. Summing up all items leads to a  
48 raw total score between 0 and 45. SDM Q-9 is only used at discharge.  
49  
50

51 *Measure for a varied and healthy diet in an appropriate amount:* Is measured by the Nordic monitoring of  
52 diet, PA and overweight (NORMON) developed in a Nordic collaboration and used for common monitoring  
53 [46]. The questionnaire explores how often 16 food indicators are consumed the last 12 months, of which  
54 several are recommended in the Nordic national nutritional recommendations. Also questions related to  
55 alcohol intake, smoking and PA are included The questionnaire was validated in 2009 against existing  
56  
57  
58  
59  
60

1  
2  
3  
4  
5  
6  
7  
8  
9  
10  
11  
12  
13  
14  
15  
16  
17  
18  
19  
20  
21  
22  
23  
24  
25  
26  
27  
28  
29  
30  
31  
32  
33  
34  
35  
36  
37  
38  
39  
40  
41  
42  
43  
44  
45  
46  
47  
48  
49  
50  
51  
52  
53  
54  
55  
56  
57  
58  
59  
60

questionnaires about diet [47]. In this study the questionnaire will be modified, so that the patients will be asked to recall their diet habits the last month.

### **Statistics**

Numeric continuous data collected at admission, discharge and follow up is reported descriptively as mean and standard deviation together with 95% confidence intervals, or as median, upper and lower quartile as well as interquartile range. Changes over time are reported on the basis of paired t-test. In sub study 3 and 4 the reliability of the outcome measures is analyzed by paired t-test, Pearson's product-moment correlation and coefficient of variation or intraclass correlation coefficient between the test- retest sessions. Dropout analysis is made for the primary outcomes. All available data are analyzed as intention to treat with no imputation made.

### **Ethics and dissemination**

During the intervention period, all newly injured patients who are admitted for rehabilitation at CSCI are offered the treatment and tests included in the intervention to the extent they are able to participate depending on e.g. the level of lesion and completeness of the injury, as a mandatory part of usual care. Informed consent is retrieved in order to get permission to analyze the data generated during the project. The intervention in the project is closely related with the content of the present rehabilitation, and the risk of pain and discomfort is considered modest. During the VO<sub>2</sub>peak test, there will be special attention on symptoms of autonomic dysreflexia (AD) in people with SCI above Th5-6. In case of AD, the exercise test is disrupted and relevant actions are initiated. It is assumed that any risks are by far surpassed by the therapeutic gains, such as an expected risk reduction of cardiovascular disease and consequently mortality. Any unintended events related to the elements of the intervention are reported according to existing regional procedures, and compensation is covered by the normal procedures for unintended harm during hospitalization. The study is reported to the Committees on Health Research Ethics in the Capital Region of Denmark, the Danish Data Protection Agency and is registered at Clinicaltrials.gov.

### **Data statement section**

Data from the patient's electronic medical record and the outcome measures used, is stored in a web-based database (Redcap) with limited access and ID-code to which data is transferred directly, or by an encrypted USB-stick. Only the unique identification number of the patient will be exported from Redcap during data analysis. Data is stored until December 31, 2027 after which paper material is shredded and data files are deleted. The Redcap database will no longer be accessible after this date. The principal investigator has access to all trial data. Data can be accessed by request to the corresponding author after publications related to the Ph.D project are made. A data monitoring committee is not established.

### **DISCUSSION**

This study will investigate the effectiveness of a uniform and systematic institutional strategy incorporating targeted strategic patient education about cardiovascular risk factors, PA and a healthy diet lifestyle with an early off-set in the SCI diagnosis during primary rehabilitation, compared to a historic control. Our findings will be discussed against recent studies suggesting that an interdisciplinary and multimodal approach in prevention of cardiovascular risks among people with SCI with a focus on diet, PA and

1  
2  
3  
4 behavioral interventions, is favorable [15] [48] [49] [16, 50] [51]. Crucial components in the present  
5 intervention, of which several also acts as outcome measures, are autonomy in relation to decision making  
6 as well as support and follow up from health care professionals and mentors with SCI. Of considerable  
7 interest a qualitative meta-synthesis concluded, that timely information about PA and its benefits in  
8 relation to the diagnosis and behavioral interventions using goalsetting and motivational feedback through  
9 physical tests might be an important patient activating tools [52], and is line with a recent systematic  
10 review by Greaves et al [24]. As incorporated in the present intervention, the review by Greaves et al. also  
11 strongly recommend, that interventions in the clinical setting should contain both group sessions and  
12 individual sessions as well as interdisciplinary interventions that focus on maintaining PA and healthy diet  
13 [24].  
14  
15  
16

17  
18 Several of the outcome measures used to evaluate the intervention, are a part of the intervention as  
19 recommended in the clinical guidelines for identification and management of cardiometabolic risk after  
20 spinal cord injury [2]. The outcome measures also serve as individual motivational tools. The primary  
21 outcome measure chosen, is VO<sub>2</sub>peak while a significant and positive relationship exists between VO<sub>2</sub>peak  
22 and some cardio metabolic markers such as lipid profiles and fasting insulin in people with SCI  
23 [13]. Therefore, physical activity and exercise increasing physical capacity may also reduce the risk of cardio-  
24 vascular disease [53]. Furthermore physical capacity measured as VO<sub>2</sub>peak is positively associated with  
25 functional independence [54], less physical strain during activities of daily living [55] and life satisfaction  
26 [56] in people with SCI, although other measures of physical capacity have an important, and in some cases  
27 stronger impact on functional independence [54].  
28  
29  
30

31  
32 For people with SCI, several test protocols have been used for assessing VO<sub>2</sub>peak [36]. In this study four  
33 different pre -defined exercise protocols are used, to make VO<sub>2</sub>peak testing feasible for clinical  
34 physiotherapist who, although trained in using the test equipment, are inexperienced in determining the  
35 appropriate workload during VO<sub>2</sub>peak testing, which is difficult due to the complexity of a SCI. In this way-  
36 if predefined criteria for VO<sub>2</sub>peak are not reached, a more suitable protocol is chosen to reach VO<sub>2</sub>peak.  
37 The protocol and equipment used at admission in the intervention study must be identical at discharge. If a  
38 patients neurological and functional level has improved to an extent where using a different protocol and  
39 equipment will help improving the actual VO<sub>2</sub>peak, an additional test at discharge will be performed on a  
40 separate day. Data from both tests will be evaluated and published and the new protocol will be repeated  
41 at follow up 6 months after discharge. This approach to testing VO<sub>2</sub>peak in a clinical setting has, to the best  
42 of our knowledge, not been described previously  
43  
44  
45

46  
47 Among the secondary outcome measures used to evaluate the intervention are measures of PA. Objective  
48 PA will be measured by the Actiheart accelerometer, which has previously been used for wheelchair users  
49 with SCI in a laboratory or outpatient setting [31]. In this study it will be used in an inpatient setting and in  
50 people with SCI and ambulatory function, which has not been described previously. As a measure of self-  
51 reported PA, a validated Danish version of the Leisure Time Physical Activity Questionnaire for people with  
52 Spinal Cord Injury will be used. This version has been adapted to a Danish context in close collaboration  
53 with the developers of the original questionnaire, whereby PA in relation to active transportation, i.e. hand  
54 biking or wheeling as transportation to work or school, as well as active physiotherapy exercises are  
55 included, as this is common PA for people with SCI in Denmark.  
56  
57  
58  
59  
60



1  
2  
3  
4 The primary study is possible due to the length of stay during initial rehabilitation at CSCI, which is in  
5 average 85 and 86 days respectively for people with incomplete tetra- and paraplegia while average length  
6 of stay is 110- and 123 days respectively for people with complete tetra- and paraplegia (originates from  
7 internal inventory, 2014). The study is highly dependent of the interdisciplinary health care professionals  
8 and the patients' adherence to the new intervention. The interdisciplinary health care professionals  
9 adherence to the intervention is described and secured by a process inspired by a previously used  
10 prospective effect and process evaluation for complex trials, where at least 75% of the health care  
11 professionals must agree that a specific element of strategic patient education has become a part of clinical  
12 practice routines before it is considered implemented [57]. This evaluation is repeated every 6-8 weeks  
13 throughout the intervention period by the project manager. Likewise, perceived barriers for the  
14 implementation process is evaluated throughout the intervention period every 6-8 weeks by the project  
15 manager, in order to facilitate the implementation. Interdisciplinary coordination meetings three times  
16 weekly is used by the moderators to facilitate the implementation of the different elements of the  
17 intervention.  
18  
19  
20  
21  
22

23 Patient adherence may be challenged as described previously where patients missed out in average 2.5  
24 hours weekly of their rehabilitation [58]. Patient adherence to the intervention is described at discharge by  
25 the patient, who will document participation in the different targeted education elements by a checklist.  
26 On the other hand, a study from 2016 found that the most important factors facilitating participation in  
27 clinical studies, were the possibility of learning more about SCI and health which is made possible in the  
28 intervention study [59]. A review by Van Wyk et al. emphasizes that patient education is an important part  
29 of the interdisciplinary rehabilitation of people with SCI and recommend an individualized approach and  
30 the use of different settings in which the patient can receive the education [29].  
31  
32  
33

#### 34 **Author Contributions**

35  
36 Nicolaj Jersild Holm has been primarily responsible for writing the protocol. Tom Møller (head  
37 supervisor), Fin Biering-Sørensen and Lone Schou (co- supervisors) have all contributed to the development  
38 of the protocol and study design, as well as feedback, supervision and contributions to the text writing. Lis  
39 Adamsen has read and commented on several of the protocol drafts and have contributed to ideas of how  
40 to ensure the adherence of the participants during the intervention. Line Dalsgaard has, in particular,  
41 contributed with sparring about the clinical setting and workflows integrated in the project and the initial  
42 development and writing of the protocol. All authors have approved the final version of the manuscript.  
43  
44  
45

#### 46 **Funding statement**

47  
48 This work was supported by a mutual cooperation about the research programme "Centre for Integrated  
49 Rehabilitation of Cancer Patients (CIRE) - Neuro/Psychology", between the University Hospitals Centre for  
50 Health Care Research, University hospital Copenhagen, Rigshospitalet, University College Copenhagen,  
51 Department of Nursing and Nutrition, and the Neuroscience Centre, Rigshospitalet.  
52  
53

#### 54 **Competing interest's statement**

55  
56 The authors have no interests of conflict related to the project in general or any of the subprojects.  
57  
58  
59  
60

## REFERENCES

1. Biering-Sorensen, F., *Rygmarvsskade-den moderne behandling*. ugeskrift for læger, 2001. **163**(20): p. 2766-2769.
2. Nash, M.S., et al., *Identification and Management of Cardiometabolic Risk after Spinal Cord Injury: Clinical Practice Guideline for Health Care Providers*. Top Spinal Cord Inj Rehabil, 2018. **24**(4): p. 379-423.
3. Rajan, S., et al., *Clinical assessment and management of obesity in individuals with spinal cord injury: a review*. J Spinal Cord Med, 2008. **31**(4): p. 361-72.
4. Wahman, K., et al., *Cardiovascular disease risk and the need for prevention after paraplegia determined by conventional multifactorial risk models: the Stockholm spinal cord injury study*. J Rehabil Med, 2011. **43**(3): p. 237-42.
5. Libin, A., et al., *Cardiometabolic risk clustering in spinal cord injury: results of exploratory factor analysis*. Top Spinal Cord Inj Rehabil, 2013. **19**(3): p. 183-94.
6. Nash, M.S., et al., *Cardiometabolic Syndrome in People With Spinal Cord Injury/Disease: Guideline-Derived and Nonguideline Risk Components in a Pooled Sample*. Arch Phys Med Rehabil, 2016. **97**(10): p. 1696-705.
7. Felleiter, P., et al., *Post-traumatic changes in energy expenditure and body composition in patients with acute spinal cord injury*. J Rehabil Med, 2017. **49**(7): p. 579-584.
8. de Groot S, P.M., Postma K, Sluis TA, van der Woude LH. , *Prospective analysis of body mass index during and up to 5 years after discharge from inpatient spinal cord injury rehabilitation*. J Rehabil Med. 2010 Nov;42, 2010. **42**(nov).
9. Stenson, K.W., et al., *Obesity and inpatient rehabilitation outcomes for patients with a traumatic spinal cord injury*. Arch Phys Med Rehabil, 2011. **92**(3): p. 384-90.
10. Ginis, K.A., et al., *Leisure time physical activity in a population-based sample of people with spinal cord injury part II: activity types, intensities, and durations*. Arch Phys Med Rehabil, 2010. **91**(5): p. 729-33.
11. Salem, R., et al., *Obesity and symptoms and quality of life indicators of individuals with disabilities*. Disabil Health J, 2014. **7**(1): p. 124-30.
12. Sundhedsstyrelsen. *Fysisk aktivitet-håndbog om forebyggelse og behandling*. 2011.
13. Martin Ginis, K.A., S. Jorgensen, and J. Stapleton, *Exercise and sport for persons with spinal cord injury*. Pm r, 2012. **4**(11): p. 894-900.
14. Martin Ginis, K.A., et al., *Evidence-based scientific exercise guidelines for adults with spinal cord injury: an update and a new guideline*. Spinal Cord, 2017.
15. Nash, M.S., R.E. Cowan, and J. Kressler, *Evidence-based and heuristic approaches for customization of care in cardiometabolic syndrome after spinal cord injury*. J Spinal Cord Med, 2012. **35**(5): p. 278-92.
16. Nooijen, C.F., et al., *Exercise self-efficacy and the relation with physical behavior and physical capacity in wheelchair-dependent persons with subacute spinal cord injury*. J Neuroeng Rehabil, 2015. **12**: p. 103.
17. Bjerre, E., K. Brasso, and J. Midtgaard, *[Pragmatic trials are important to medical research]*. Ugeskr Laeger, 2015. **177**(31).
18. Chan, A.W., et al., *SPIRIT 2013 statement: defining standard protocol items for clinical trials*. Ann Intern Med, 2013. **158**(3): p. 200-7.



1  
2  
3  
4  
5  
6  
7  
8  
9  
10  
11  
12  
13  
14  
15  
16  
17  
18  
19  
20  
21  
22  
23  
24  
25  
26  
27  
28  
29  
30  
31  
32  
33  
34  
35  
36  
37  
38  
39  
40  
41  
42  
43  
44  
45  
46  
47  
48  
49  
50  
51  
52  
53  
54  
55  
56  
57  
58  
59  
60

19. T, M., *Individualized supervised patient education: a key role in reinforcement of infection protection and outpatient management of acute leukemia*, in *The University Hospitals Centre for Nursing and Care Research*. 2011: Copenhagen.
20. van Wyk, K., A. Backwell, and A. Townson, *A narrative literature review to direct spinal cord injury patient education programming*. *Top Spinal Cord Inj Rehabil*, 2015. **21**(1): p. 49-60.
21. Lynch, J. and R. Cahalan, *The impact of spinal cord injury on the quality of life of primary family caregivers: a literature review*. *Spinal Cord*, 2017.
22. Goosey-Tolfrey, V.L., et al., *Prediction of peak oxygen uptake from differentiated ratings of perceived exertion during wheelchair propulsion in trained wheelchair sportspersons*. *Eur J Appl Physiol*, 2014. **114**(6): p. 1251-8.
23. Latimer-Cheung, A.E., et al., *Developing physical activity interventions for adults with spinal cord injury. Part 2: motivational counseling and peer-mediated interventions for people intending to be active*. *Rehabil Psychol*, 2013. **58**(3): p. 307-15.
24. Greaves, C.J., et al., *Systematic review of reviews of intervention components associated with increased effectiveness in dietary and physical activity interventions*. *BMC Public Health*, 2011. **11**: p. 119.
25. Stacey, D., et al., *Decision aids for people facing health treatment or screening decisions*. *Cochrane Database Syst Rev*, 2017. **4**: p. Cd001431.
26. Billinger, S.A., B.Y. Tseng, and P.M. Kluding, *Modified total-body recumbent stepper exercise test for assessing peak oxygen consumption in people with chronic stroke*. *Phys Ther*, 2008. **88**(10): p. 1188-95.
27. Billinger, S.A., J.K. Loudon, and B.J. Gajewski, *Validity of a total body recumbent stepper exercise test to assess cardiorespiratory fitness*. *J Strength Cond Res*, 2008. **22**(5): p. 1556-62.
28. DiPiro, N.D., et al., *Effects of aerobic exercise training on fitness and walking-related outcomes in ambulatory individuals with chronic incomplete spinal cord injury*. *Spinal Cord*, 2016. **54**(9): p. 675-81.
29. Eerden, S., R. Dekker, and F.J. Hettinga, *Maximal and submaximal aerobic tests for wheelchair-dependent persons with spinal cord injury: a systematic review to summarize and identify useful applications for clinical rehabilitation*. *Disabil Rehabil*, 2017: p. 1-25.
30. Nightingale, T.E., et al., *Predicting physical activity energy expenditure in wheelchair users with a multisensor device*. *BMJ Open Sport Exerc Med*, 2015. **1**(1).
31. Nightingale, T.E., et al., *Measurement of Physical Activity and Energy Expenditure in Wheelchair Users: Methods, Considerations and Future Directions*. *Sports Med Open*, 2017. **3**(1): p. 10.
32. Silveira, S.L., et al., *Methods for classifying obesity in spinal cord injury: a review*. *Spinal Cord*, 2017.
33. Piepoli, M.F., et al., *2016 European Guidelines on cardiovascular disease prevention in clinical practice: The Sixth Joint Task Force of the European Society of Cardiology and Other Societies on Cardiovascular Disease Prevention in Clinical Practice (constituted by representatives of 10 societies and by invited experts): Developed with the special contribution of the European Association for Cardiovascular Prevention & Rehabilitation (EACPR)*. *Eur J Prev Cardiol*, 2016. **23**(11): p. Np1-np96.
34. Bauman, W.A., F. Biering-Sorensen, and A. Krassioukov, *The international spinal cord injury endocrine and metabolic function basic data set*. *Spinal Cord*, 2011. **49**(10): p. 1068-72.
35. Bauman, W.A., J.M. Wecht, and F. Biering-Sorensen, *International spinal cord injury endocrine and metabolic extended data set*. *Spinal Cord*, 2017. **55**(5): p. 466-477.
36. Catz, A., et al., *A multicenter international study on the Spinal Cord Independence Measure, version III: Rasch psychometric validation*. *Spinal Cord*, 2007. **45**(4): p. 275-91.
37. Itzkovich, M., et al., *The Spinal Cord Independence Measure (SCIM) version III: reliability and validity in a multi-center international study*. *Disabil Rehabil*, 2007. **29**(24): p. 1926-33.
38. Anderson, K.D., et al., *United States (US) multi-center study to assess the validity and reliability of the Spinal Cord Independence Measure (SCIM III)*. *Spinal Cord*, 2011. **49**(8): p. 880-5.

- 1
- 2
- 3
- 4
- 5 39. Fekete, C., et al., *Development and validation of a self-report version of the Spinal Cord Independence Measure (SCIM III)*. *Spinal Cord*, 2013. **51**(1): p. 40-7.
- 6
- 7 40. Kirshblum, S. and W. Waring, 3rd, *Updates for the International Standards for Neurological Classification of Spinal Cord Injury*. *Phys Med Rehabil Clin N Am*, 2014. **25**(3): p. 505-17, vii.
- 8
- 9 41. Kirshblum, S.C., et al., *International standards for neurological classification of spinal cord injury (revised 2011)*. *J Spinal Cord Med*, 2011. **34**(6): p. 535-46.
- 10
- 11 42. Poritz, J.M.P., et al., *The Patient Health Questionnaire depression screener in spinal cord injury*. *J Spinal Cord Med*, 2017: p. 1-7.
- 12
- 13 43. Charlifue, S., et al., *International Spinal Cord Injury Quality of Life Basic Data Set*. *Spinal Cord*, 2012. **50**(9): p. 672-5.
- 14
- 15 44. Post, M.W., et al., *Good validity of the international spinal cord injury quality of life basic data set*. *Spinal Cord*, 2016. **54**(4): p. 314-8.
- 16
- 17 45. Kroll, T., et al., *The SCI Exercise Self-Efficacy Scale (ESES): development and psychometric properties*. *Int J Behav Nutr Phys Act*, 2007. **4**: p. 34.
- 18
- 19 46. Matthiessen J, A.L., Barbieri HE, Borodulin K, Knudsen VK, and T.H. Kørup K, Trolle E and Fagt S *The Nordic Monitoring System 2011–2014 Status and development of diet, physical activity, smoking, alcohol and overweight*. 2016: TemaNord 2016.
- 20
- 21 47. Mathiessen J, A.L., Barbieri H et al, *The Nordic Monitoring of Diet, Physical Activity, Smoking, Alcohol and Overweight: 2011-2014*. *European Journal of Nutrition & Food Safety*, 2017. **7**(2): p. 128-130.
- 22
- 23
- 24
- 25
- 26 48. Gater, D.R., Jr., *Obesity after spinal cord injury*. *Phys Med Rehabil Clin N Am*, 2007. **18**(2): p. 333-51, vii.
- 27
- 28
- 29 49. Liusuwan, R.A., et al., *Behavioral intervention, exercise, and nutrition education to improve health and fitness (BENEFIT) in adolescents with mobility impairment due to spinal cord dysfunction*. *J Spinal Cord Med*, 2007. **30** Suppl 1: p. S119-26.
- 30
- 31 50. Chen, Y., et al., *Obesity intervention in persons with spinal cord injury*. *Spinal Cord*, 2006. **44**(2): p. 82-91.
- 32
- 33
- 34 51. Nash, M.S. and J. Kressler, *Model Programs to Address Obesity and Cardiometabolic Disease: Interventions for Suboptimal Nutrition and Sedentary Lifestyles*. *Arch Phys Med Rehabil*, 2016. **97**(9 Suppl): p. S238-46.
- 35
- 36
- 37 52. Williams, T.L., J.K. Ma, and K.A. Martin Ginis, *Participant experiences and perceptions of physical activity-enhancing interventions for people with physical impairments and mobility limitations: a meta-synthesis of qualitative research evidence*. *Health Psychol Rev*, 2017. **11**(2): p. 179-196.
- 38
- 39 53. de Groot, S., et al., *The longitudinal relationship between lipid profile and physical capacity in persons with a recent spinal cord injury*. *Spinal Cord*, 2008. **46**(5): p. 344-51.
- 40
- 41 54. Haisma, J.A., et al., *Functional independence and health-related functional status following spinal cord injury: a prospective study of the association with physical capacity*. *J Rehabil Med*, 2008. **40**(10): p. 812-8.
- 42
- 43 55. Janssen, T.W., et al., *Relationship between physical strain during standardised ADL tasks and physical capacity in men with spinal cord injuries*. *Paraplegia*, 1994. **32**(12): p. 844-59.
- 44
- 45 56. van Koppenhagen, C.F., et al., *Longitudinal relationship between wheelchair exercise capacity and life satisfaction in patients with spinal cord injury: A cohort study in the Netherlands*. *J Spinal Cord Med*, 2014. **37**(3): p. 328-37.
- 46
- 47 57. de Groot, S., et al., *Effect and process evaluation of implementing standardized tests to monitor patients in spinal cord injury rehabilitation*. *Disabil Rehabil*, 2010. **32**(7): p. 588-97.
- 48
- 49 58. Zanca, J.M., et al., *Pain and its impact on inpatient rehabilitation for acute traumatic spinal cord injury: analysis of observational data collected in the SCIRehab study*. *Arch Phys Med Rehabil*, 2013. **94**(4 Suppl): p. S137-44.
- 50
- 51
- 52
- 53
- 54
- 55
- 56
- 57
- 58
- 59
- 60

1  
2  
3  
4  
5  
6  
7  
8  
9  
10  
11  
12  
13  
14  
15  
16  
17  
18  
19  
20  
21  
22  
23  
24  
25  
26  
27  
28  
29  
30  
31  
32  
33  
34  
35  
36  
37  
38  
39  
40  
41  
42  
43  
44  
45  
46  
47  
48  
49  
50  
51  
52  
53  
54  
55  
56  
57  
58  
59  
60

59. Anderson, K.D., R.E. Cowan, and J. Horsewell, *Facilitators and Barriers to Spinal Cord Injury Clinical Trial Participation: Multi-National Perspective of People Living with Spinal Cord Injury*. J Neurotrauma, 2016. **33**(5): p. 493-9.

For peer review only

**Table 1.** World Health Organization Trial Registration Data Set (Version 1.3.1)

| Data category                                 | Information                                                                                                                                                                                                                                                                                                                                                                                                               |
|-----------------------------------------------|---------------------------------------------------------------------------------------------------------------------------------------------------------------------------------------------------------------------------------------------------------------------------------------------------------------------------------------------------------------------------------------------------------------------------|
| Primary registry and trial identifying number | ClinicalTrials.gov (NCT03369080) and (NCT03689023).                                                                                                                                                                                                                                                                                                                                                                       |
| Date of registration in primary registry      | 12.11.2017 and 26.09.2018                                                                                                                                                                                                                                                                                                                                                                                                 |
| Secondary identifying numbers                 | The Committees on Health Research Ethics in the Capital Region of Denmark on 10.07.2018 (Journal-nr.: H-18018325) and the Danish Data Protection Agency (j.nr. VD-2018-380, I-Suite nr.: 6631) and (RH-2017-345, I-Suite nr.: 06052)                                                                                                                                                                                      |
| Source(s) of monetary or material support     | This work was supported by a mutual cooperation about the research program "Centre for Integrated Rehabilitation of Cancer Patients (CIRE) - Neuro/Psychology", between the University Hospitals Centre for Health Research, UCSF Copenhagen University Hospital Rigshospitalet Department 9701 Denmark, University College Copenhagen, Department of Nursing and Nutrition, and the Neuroscience Centre, Rigshospitalet. |
| Primary sponsor                               | This work was supported by a mutual cooperation about the research program "Centre for Integrated Rehabilitation of Cancer Patients (CIRE) - Neuro/Psychology", between the University Hospitals Centre for Health Research, UCSF Copenhagen University Hospital Rigshospitalet Department 9701 Denmark, University College Copenhagen, Department of Nursing and Nutrition, and the Neuroscience Centre, Rigshospitalet. |
| Secondary sponsor(s)                          |                                                                                                                                                                                                                                                                                                                                                                                                                           |

|                                                                            |                                           |                                                                                                                                                                                                                                                                                                                                                                                          |
|----------------------------------------------------------------------------|-------------------------------------------|------------------------------------------------------------------------------------------------------------------------------------------------------------------------------------------------------------------------------------------------------------------------------------------------------------------------------------------------------------------------------------------|
| 1<br>2<br>3<br>4<br>5<br>6<br>7<br>8                                       | Contact for public queries                | Nicolaj Jersild Holm ( <a href="mailto:nicolaj.jersild.holm@regionh.dk">nicolaj.jersild.holm@regionh.dk</a> ), phone: +45 38631963, Rigshospitalet, Neuroscience Center, Clinic for Spinal Cord Injuries, Havnevej 25, 3100, Hornbæk, Denmark                                                                                                                                            |
| 9<br>10<br>11<br>12<br>13<br>14<br>15                                      | Contact for scientific queries            | Nicolaj Jersild Holm ( <a href="mailto:nicolaj.jersild.holm@regionh.dk">nicolaj.jersild.holm@regionh.dk</a> ), phone: +45 38631963, Rigshospitalet, Neuroscience Center, Clinic for Spinal Cord Injuries, Havnevej 25, 3100, Hornbæk, Denmark                                                                                                                                            |
| 16<br>17<br>18<br>19<br>20                                                 | Public title                              | Health promotion and cardiovascular risk reduction in people with spinal cord injury - physical activity, healthy diet and maintenance after discharge: study protocol for a national cohort study followed by a clinical intervention study.                                                                                                                                            |
| 21<br>22<br>23<br>24<br>25                                                 | Scientific title                          | Health promotion and cardiovascular risk reduction in people with spinal cord injury - physical activity, healthy diet and maintenance after discharge: study protocol for a prospective national cohort study followed by a pre-post intervention study.                                                                                                                                |
| 26<br>27<br>28                                                             | Countries of recruitment                  | Denmark                                                                                                                                                                                                                                                                                                                                                                                  |
| 29<br>30<br>31<br>32<br>33                                                 | Health condition(s) or problem(s) studied | Spinal Cord Injury and the cardiovascular risk factor, including weight gain and consequences of an inactive lifestyle during and after the primary rehabilitation.                                                                                                                                                                                                                      |
| 34<br>35<br>36<br>37<br>38<br>39<br>40<br>41<br>42<br>43<br>44<br>45<br>46 | Intervention(s)                           | A controlled pre-post multi modal pragmatic clinical intervention study, with 6-months of follow up containing "new usual care" consisting of a uniform and systematic institutional strategy incorporating targeted strategic patient education about cardiovascular risk factors, physical activity and a healthy diet lifestyle starting early in the primary rehabilitation process. |

|                                      |                                                                                                                                                                                                                                                                                                                                                                                          |
|--------------------------------------|------------------------------------------------------------------------------------------------------------------------------------------------------------------------------------------------------------------------------------------------------------------------------------------------------------------------------------------------------------------------------------------|
|                                      | Comparator: A historic control conducted as a national prospective cohort study before “new usual care”                                                                                                                                                                                                                                                                                  |
| Key inclusion and exclusion criteria | Inclusion criteria: All patients who are 18 years or older, and with a Spinal Cord Injury (SCI) within the last 12 months and admitted at Clinic for Spinal Cord Injuries, are included regardless of etiology to the SCI, neurological level or completeness of the lesion if informed consent is retrieved.                                                                            |
|                                      | Exclusion criteria: Exclusion criteria for VO <sub>2</sub> peak test in the study includes motor complete SCI at C4 level or above, and assisted ventilatory function. Other exclusion criteria are the presence of decubitus, severe spasticity or musculoskeletal problems considered at risk of aggravation during testing or preventing completion of the VO <sub>2</sub> peak test. |
| Study type                           | Interventional. The study consists of a primary study designed as a controlled pre-post clinical intervention study and a historic control conducted as a prospective cohort study.                                                                                                                                                                                                      |
|                                      | Allocation: The intervention in the primary study is a part of new standard care. Therefore randomization or blinding is not appropriate.                                                                                                                                                                                                                                                |
|                                      | Primary purpose: prevention                                                                                                                                                                                                                                                                                                                                                              |
| Date of first enrolment              | November 2017                                                                                                                                                                                                                                                                                                                                                                            |
| Target sample size                   | 160 in total based on both studies                                                                                                                                                                                                                                                                                                                                                       |
| Recruitment status                   | Recruiting                                                                                                                                                                                                                                                                                                                                                                               |
| Primary outcome(s)                   | Oxygen uptake measured as VO <sub>2</sub> peak.                                                                                                                                                                                                                                                                                                                                          |
| Key secondary outcomes               | Body Mass Index, Body composition (determined by Dual energy x-ray absorptiometry), metabolic profile consisting of CRP as a marker for inflammation, lipid profile describing Total cholesterol, Triglycerides, HDL cholesterol, and LDL                                                                                                                                                |

|                       |                                                                                                                                              |
|-----------------------|----------------------------------------------------------------------------------------------------------------------------------------------|
|                       | cholesterol and Hemoglobin A1c as a marker for carbohydrate metabolism, and blood pressure (BP).                                             |
| Ethics Review         | The project is approved by the Committees on Health Research Ethics in the Capital Region of Denmark on 10.07.2018 (Journal-nr.: H-18018325) |
| Completion data       | June 2020                                                                                                                                    |
| IPD sharing statement | Data can be accessed by request to the corresponding author after publications related to the Ph.D project are made.                         |

For peer review only

1  
2  
3  
4  
5  
6  
7  
8  
9  
10  
11  
12  
13  
14  
15  
16  
17  
18  
19  
20  
21  
22  
23  
24  
25  
26  
27  
28  
29  
30  
31  
32  
33  
34  
35  
36  
37  
38  
39  
40  
41  
42  
43  
44  
45  
46

For peer review only

1  
2  
3  
4  
5  
6  
7  
8  
9  
10  
11  
12  
13  
14  
15  
16  
17  
18  
19  
20  
21  
22  
23  
24  
25  
26  
27  
28  
29  
30  
31  
32  
33  
34  
35  
36  
37  
38  
39  
40  
41  
42 **Figure 1.**

43 Timeline for all sub studies and used outcome measures. Figure A and B illustrates the prospective historic control study and the intervention study respectively

44  
45  
46



Fig. A

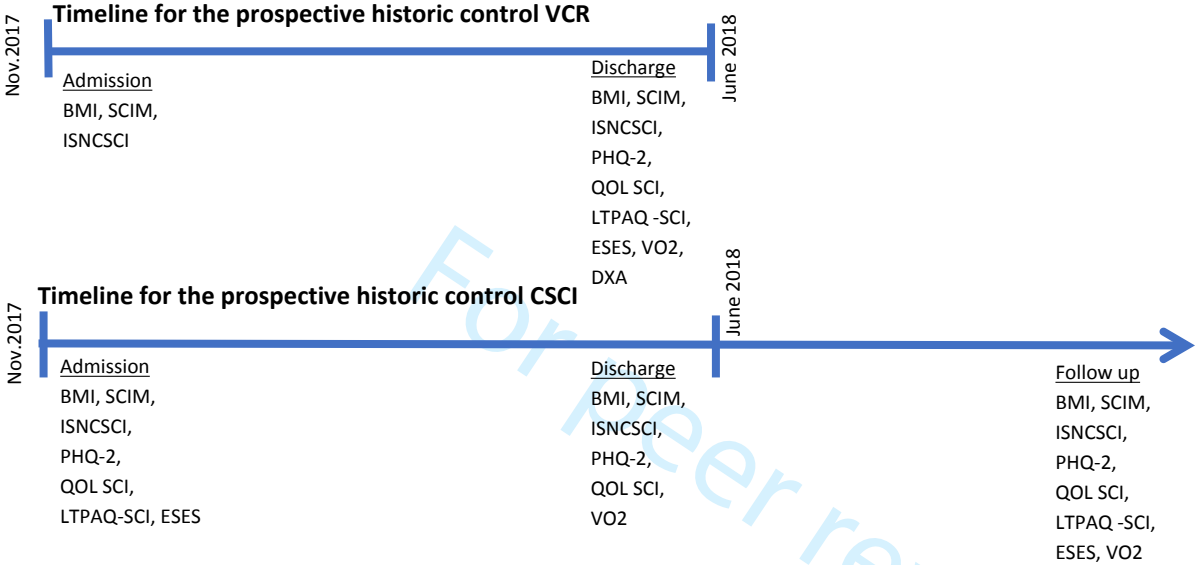

Fig. B

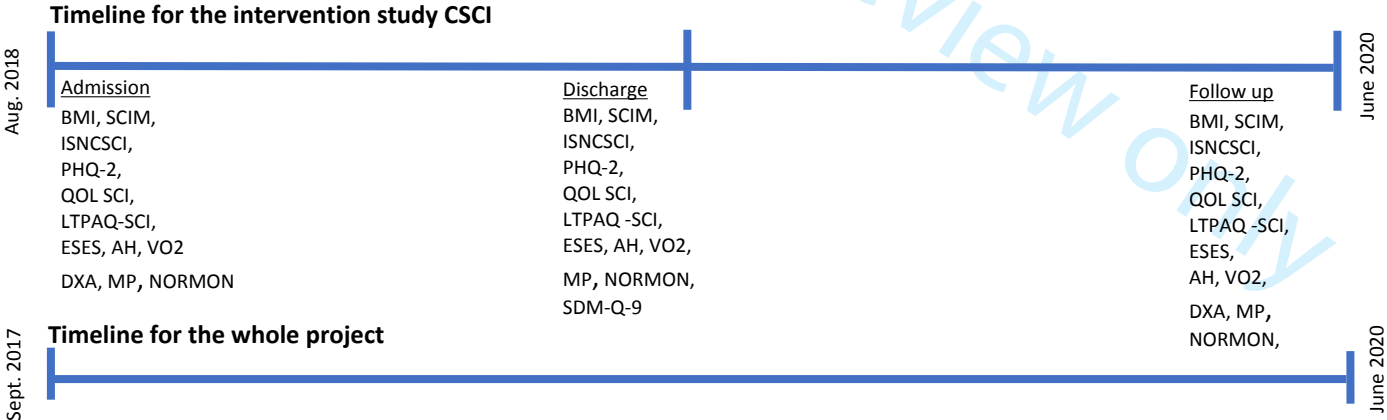

**VCR:** Center for Spinal Cord Injury, Western Denmark ; **CSCI:** Clinic for Spinal Cord Injuries, Eastern Denmark; **BMI:** Body Mass Index; **SCIM:** Spinal Cord Injury Independence Measure; **ISNCSCI:** International Standards for Neurological Classification of Spinal Cord Injury; **PHQ-2:** Patient Health Questionnaire- 2; **QOL SCI:** International SCI Quality of Life Basic Data Set; **LTPAQ-SCI:** Leisure Time Physical Activity Questionnaire for people With Spinal Cord Injury; **ESES:** Exercise Self Efficacy Scale ;**AH:** Actiheart (accelerometer); **VO2peak:**peak oxygen uptake ;**DXA:** Dual- energy X-ray Absorptiometry; **MP:** Metabolic profile; **NORMON:** Nordic monitoring of diet, physical activity and overweight; **SDM-Q-9:** 9-item Shared Decision Making Questionnaire

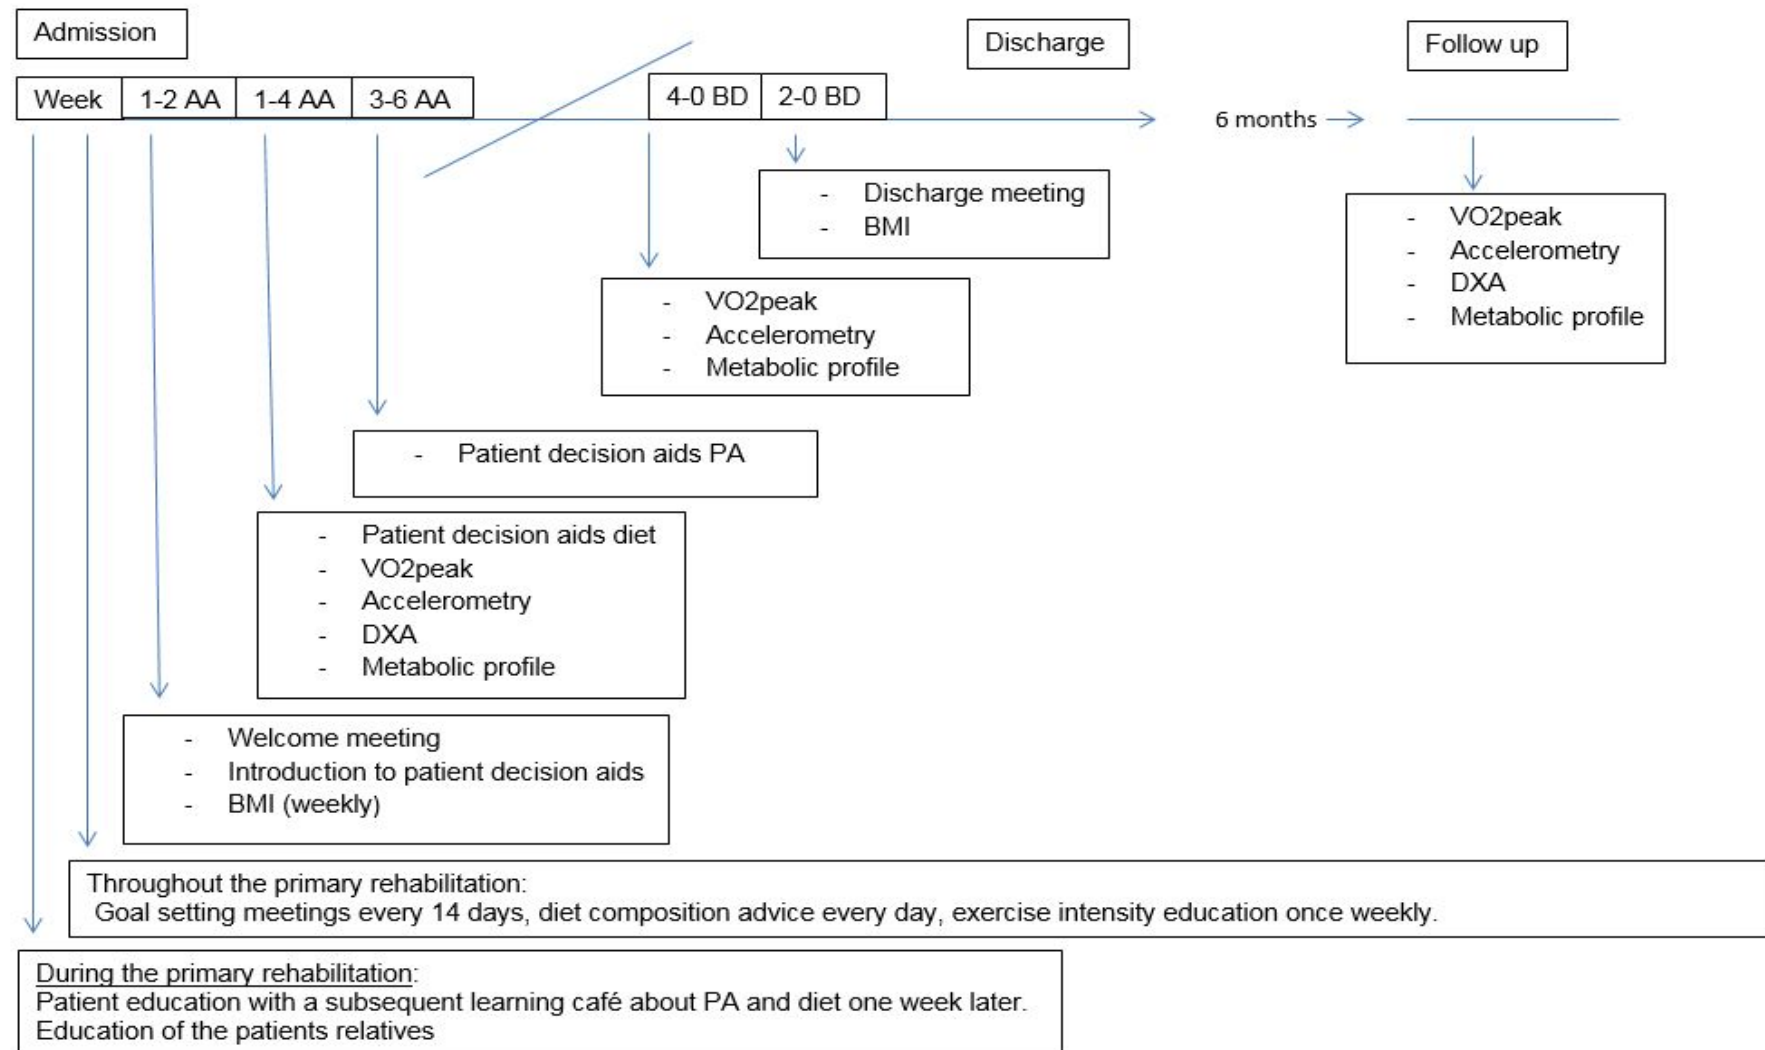

37  
38  
39  
40  
41  
42  
43  
44  
45  
46

Figure 2. Timeline illustrated on the pocket card for systematic targeted approaches during primary rehabilitation within 2, 4 and 6 weeks after admission (AA) and during the last 4 and 2 weeks before discharge (BD) and at follow up 6 months after discharge. **PA:** Physical activity; **VO<sub>2</sub>peak:** peak oxygen uptake; **BMI:** Body Mass Index; **DXA:** Dual- energy X-ray Absorptiometry.

Appendix: Strategic interventions

Information and education in group sessions

| Strategic interventions                                            | Scope/ Content                                                                                                                                                                                                                                                                                         | Procedure                                                                                                                                                                                                                                                        | Health care staff                                                                                                             | Process                                                                                                            |
|--------------------------------------------------------------------|--------------------------------------------------------------------------------------------------------------------------------------------------------------------------------------------------------------------------------------------------------------------------------------------------------|------------------------------------------------------------------------------------------------------------------------------------------------------------------------------------------------------------------------------------------------------------------|-------------------------------------------------------------------------------------------------------------------------------|--------------------------------------------------------------------------------------------------------------------|
| Pre- education of all health care professionals and peers with SCI | To prepare a uniform and systematic approach and clarifying the roles of each profession in relation to the targeted patient education, an evidence-based pre-education of the interdisciplinary health care personnel and peers with SCI is performed about cardiovascular risk, PA and healthy diet. | Pre-education is performed by stakeholders, as one session just before the intervention start-up. Pocket cards with evidence based basic recommendations related to PA and healthy diet in people with SCI are provided to all professions and peers with SCI.   | All health care professionals at the clinic, and all peers from the peer corps.                                               | The pre-education is performed multiple times until all health care professionals have attended the pre-education. |
| Patient education + session about diet and PA                      | To Inform the patients about SCI in general, including specific evidence based information about cardiovascular risk and overweight as a mandatory part, facilitating patients discussing healthy diet and PA                                                                                          | Patient education is performed face- to-face as a group session. Afterwards the patients discuss PA and healthy diet. Interdisciplinary health care professionals facilitates the session from evidence based information in the patient decision aids material. | Patient education: Medical doctors.<br><br>Session about diet and PA: Interdisciplinary health care professionals.            | Once                                                                                                               |
| Education of relatives                                             | To inform the relatives about SCI in general, including specific evidence based information about cardiovascular risk and overweight and the benefits of healthy diet and PA as a mandatory element.                                                                                                   | The session last a full day with face-to-face information and discussion about several aspects related to SCI and the role as a relative.                                                                                                                        | Interdisciplinary+ invited relatives to former patients sharing their experiences about being a relative to a person with SCI | Once                                                                                                               |
| Admission meeting                                                  | A group setting where patients and relatives are informed about the scope of the rehabilitation and consequences of a SCI.                                                                                                                                                                             | Information face- to-face about cardiovascular risk and overweight and the benefits of healthy diet and PA is provided                                                                                                                                           | Interdisciplinary team                                                                                                        | Once                                                                                                               |

|    |                                                                                   |  |  |  |  |
|----|-----------------------------------------------------------------------------------|--|--|--|--|
| 1  |                                                                                   |  |  |  |  |
| 2  |                                                                                   |  |  |  |  |
| 3  |                                                                                   |  |  |  |  |
| 4  |                                                                                   |  |  |  |  |
| 5  |                                                                                   |  |  |  |  |
| 6  |                                                                                   |  |  |  |  |
| 7  |                                                                                   |  |  |  |  |
| 8  |                                                                                   |  |  |  |  |
| 9  |                                                                                   |  |  |  |  |
| 10 |                                                                                   |  |  |  |  |
| 11 |                                                                                   |  |  |  |  |
| 12 |                                                                                   |  |  |  |  |
| 13 |                                                                                   |  |  |  |  |
| 14 |                                                                                   |  |  |  |  |
| 15 |                                                                                   |  |  |  |  |
| 16 |                                                                                   |  |  |  |  |
| 17 |                                                                                   |  |  |  |  |
| 18 |                                                                                   |  |  |  |  |
| 19 |                                                                                   |  |  |  |  |
| 20 |                                                                                   |  |  |  |  |
| 21 |                                                                                   |  |  |  |  |
| 22 |                                                                                   |  |  |  |  |
| 23 |                                                                                   |  |  |  |  |
| 24 |                                                                                   |  |  |  |  |
| 25 |                                                                                   |  |  |  |  |
| 26 |                                                                                   |  |  |  |  |
| 27 |                                                                                   |  |  |  |  |
| 28 |                                                                                   |  |  |  |  |
| 29 |                                                                                   |  |  |  |  |
| 30 |                                                                                   |  |  |  |  |
| 31 | <p><b>Motivational physiologic outcome measures and face-to-face feedback</b></p> |  |  |  |  |
| 32 |                                                                                   |  |  |  |  |
| 33 |                                                                                   |  |  |  |  |
| 34 |                                                                                   |  |  |  |  |
| 35 |                                                                                   |  |  |  |  |
| 36 |                                                                                   |  |  |  |  |
| 37 |                                                                                   |  |  |  |  |
| 38 |                                                                                   |  |  |  |  |
| 39 |                                                                                   |  |  |  |  |
| 40 |                                                                                   |  |  |  |  |
| 41 |                                                                                   |  |  |  |  |
| 42 |                                                                                   |  |  |  |  |
| 43 |                                                                                   |  |  |  |  |
| 44 |                                                                                   |  |  |  |  |
| 45 |                                                                                   |  |  |  |  |
| 46 |                                                                                   |  |  |  |  |

|    |  |  |  |  |  |
|----|--|--|--|--|--|
| 1  |  |  |  |  |  |
| 2  |  |  |  |  |  |
| 3  |  |  |  |  |  |
| 4  |  |  |  |  |  |
| 5  |  |  |  |  |  |
| 6  |  |  |  |  |  |
| 7  |  |  |  |  |  |
| 8  |  |  |  |  |  |
| 9  |  |  |  |  |  |
| 10 |  |  |  |  |  |
| 11 |  |  |  |  |  |
| 12 |  |  |  |  |  |
| 13 |  |  |  |  |  |
| 14 |  |  |  |  |  |
| 15 |  |  |  |  |  |
| 16 |  |  |  |  |  |
| 17 |  |  |  |  |  |
| 18 |  |  |  |  |  |
| 19 |  |  |  |  |  |
| 20 |  |  |  |  |  |
| 21 |  |  |  |  |  |
| 22 |  |  |  |  |  |
| 23 |  |  |  |  |  |
| 24 |  |  |  |  |  |
| 25 |  |  |  |  |  |
| 26 |  |  |  |  |  |
| 27 |  |  |  |  |  |
| 28 |  |  |  |  |  |
| 29 |  |  |  |  |  |
| 30 |  |  |  |  |  |
| 31 |  |  |  |  |  |
| 32 |  |  |  |  |  |
| 33 |  |  |  |  |  |
| 34 |  |  |  |  |  |
| 35 |  |  |  |  |  |
| 36 |  |  |  |  |  |
| 37 |  |  |  |  |  |
| 38 |  |  |  |  |  |
| 39 |  |  |  |  |  |
| 40 |  |  |  |  |  |
| 41 |  |  |  |  |  |
| 42 |  |  |  |  |  |
| 43 |  |  |  |  |  |
| 44 |  |  |  |  |  |
| 45 |  |  |  |  |  |
| 46 |  |  |  |  |  |

**Goalsetting and  
action planning  
(lifestyle changes)**

|                                     |                                                                                                                                      |                                                                                                                                                   |                        |                                                                                 |
|-------------------------------------|--------------------------------------------------------------------------------------------------------------------------------------|---------------------------------------------------------------------------------------------------------------------------------------------------|------------------------|---------------------------------------------------------------------------------|
|                                     | to help the patient consider each option in relation to his/her overall life situation and make a choice that fits the patient well. | patient, peers with SCI are accessible, ready to share their own experiences related to PA and diet.                                              |                        | <b>goalsetting meetings</b> approx. 4 and 5 weeks after admission respectively. |
| Goal setting meetings               | A setting with the patient where goals for the rehabilitation are defined including goals related to PA and healthy diet.            | Previous goals are evaluated and new goals are defined for the next 14 days. Asking the patient about goals for PA and healthy diet is mandatory. | Interdisciplinary team | Every 14 days                                                                   |
| Follow up 3 months after discharge. | Follow up in an outpatient setting on the course of BMI and healthy diet.                                                            | The follow-up is a face-to-face interaction based on the patient decision aids for diet                                                           | Nurses                 | Once                                                                            |

Interdisciplinary team: Medical doctor, nurse, physiotherapist, occupational therapist, social worker, psychologist.

SCI: Spinal Cord Injury; PA: Physical Activity; BMI: Body Mass Index; DXA: Dual-energy X-ray Absorptiometry

# Reporting checklist for protocol of a clinical trial.

Based on the SPIRIT guidelines.

## Instructions to authors

Complete this checklist by entering the page numbers from your manuscript where readers will find each of the items listed below.

Your article may not currently address all the items on the checklist. Please modify your text to include the missing information. If you are certain that an item does not apply, please write "n/a" and provide a short explanation.

Upload your completed checklist as an extra file when you submit to a journal.

In your methods section, say that you used the SPIRIT reporting guidelines, and cite them as:

Chan A-W, Tetzlaff JM, Altman DG, Laupacis A, Gøtzsche PC, Krleža-Jerić K, Hróbjartsson A, Mann H, Dickersin K, Berlin J, Doré C, Parulekar W, Summerskill W, Groves T, Schulz K, Sox H, Rockhold FW, Rennie D, Moher D. SPIRIT 2013 Statement: Defining standard protocol items for clinical trials. *Ann Intern Med.* 2013;158(3):200-207

|                                             |                     | Reporting Item                                                                                               | Page Number |
|---------------------------------------------|---------------------|--------------------------------------------------------------------------------------------------------------|-------------|
| Title                                       | <a href="#">#1</a>  | Descriptive title identifying the study design, population, interventions, and, if applicable, trial acronym | 1           |
| Trial registration                          | <a href="#">#2a</a> | Trial identifier and registry name. If not yet registered, name of intended registry                         | 3           |
| Trial registration: data set                | <a href="#">#2b</a> | All items from the World Health Organization Trial Registration Data Set                                     | 3           |
| Protocol version                            | <a href="#">#3</a>  | Date and version identifier                                                                                  | 2           |
| Funding                                     | <a href="#">#4</a>  | Sources and types of financial, material, and other support                                                  | 13          |
| Roles and responsibilities: contributorship | <a href="#">#5a</a> | Names, affiliations, and roles of protocol contributors                                                      | 13          |

|    |                      |                     |                                                     |     |
|----|----------------------|---------------------|-----------------------------------------------------|-----|
| 1  | Roles and            | <a href="#">#5b</a> | Name and contact information for the trial          | 13  |
| 2  | responsibilities:    |                     | sponsor                                             |     |
| 3  | sponsor contact      |                     |                                                     |     |
| 4  | information          |                     |                                                     |     |
| 5  |                      |                     |                                                     |     |
| 6  |                      |                     |                                                     |     |
| 7  |                      |                     |                                                     |     |
| 8  | Roles and            | <a href="#">#5c</a> | Role of study sponsor and funders, if any, in       | 13  |
| 9  | responsibilities:    |                     | study design; collection, management, analysis,     |     |
| 10 | sponsor and funder   |                     | and interpretation of data; writing of the report;  |     |
| 11 |                      |                     | and the decision to submit the report for           |     |
| 12 |                      |                     | publication, including whether they will have       |     |
| 13 |                      |                     | ultimate authority over any of these activities     |     |
| 14 |                      |                     |                                                     |     |
| 15 |                      |                     |                                                     |     |
| 16 |                      |                     |                                                     |     |
| 17 | Roles and            | <a href="#">#5d</a> | Composition, roles, and responsibilities of the     | N/A |
| 18 | responsibilities:    |                     | coordinating centre, steering committee, endpoint   |     |
| 19 | committees           |                     | adjudication committee, data management team,       |     |
| 20 |                      |                     | and other individuals or groups overseeing the      |     |
| 21 |                      |                     | trial, if applicable (see Item 21a for data         |     |
| 22 |                      |                     | monitoring committee)                               |     |
| 23 |                      |                     |                                                     |     |
| 24 |                      |                     |                                                     |     |
| 25 |                      |                     |                                                     |     |
| 26 |                      |                     |                                                     |     |
| 27 | Background and       | <a href="#">#6a</a> | Description of research question and justification  | 3   |
| 28 | rationale            |                     | for undertaking the trial, including summary of     |     |
| 29 |                      |                     | relevant studies (published and unpublished)        |     |
| 30 |                      |                     | examining benefits and harms for each               |     |
| 31 |                      |                     | intervention                                        |     |
| 32 |                      |                     |                                                     |     |
| 33 |                      |                     |                                                     |     |
| 34 |                      |                     |                                                     |     |
| 35 |                      |                     |                                                     |     |
| 36 | Background and       | <a href="#">#6b</a> | Explanation for choice of comparators               | 3-4 |
| 37 | rationale: choice of |                     |                                                     |     |
| 38 | comparators          |                     |                                                     |     |
| 39 |                      |                     |                                                     |     |
| 40 |                      |                     |                                                     |     |
| 41 | Objectives           | <a href="#">#7</a>  | Specific objectives or hypotheses                   | 5   |
| 42 |                      |                     |                                                     |     |
| 43 | Trial design         | <a href="#">#8</a>  | Description of trial design including type of trial | 5   |
| 44 |                      |                     | (eg, parallel group, crossover, factorial, single   |     |
| 45 |                      |                     | group), allocation ratio, and framework (eg,        |     |
| 46 |                      |                     | superiority, equivalence, non-inferiority,          |     |
| 47 |                      |                     | exploratory)                                        |     |
| 48 |                      |                     |                                                     |     |
| 49 |                      |                     |                                                     |     |
| 50 |                      |                     |                                                     |     |
| 51 | Study setting        | <a href="#">#9</a>  | Description of study settings (eg, community        | 5   |
| 52 |                      |                     | clinic, academic hospital) and list of countries    |     |
| 53 |                      |                     | where data will be collected. Reference to where    |     |
| 54 |                      |                     | list of study sites can be obtained                 |     |
| 55 |                      |                     |                                                     |     |
| 56 |                      |                     |                                                     |     |
| 57 |                      |                     |                                                     |     |
| 58 |                      |                     |                                                     |     |
| 59 |                      |                     |                                                     |     |
| 60 |                      |                     |                                                     |     |



|    |                                 |                      |                                                                                                                                                                                                                                                                                                                                                                                |                                                                          |
|----|---------------------------------|----------------------|--------------------------------------------------------------------------------------------------------------------------------------------------------------------------------------------------------------------------------------------------------------------------------------------------------------------------------------------------------------------------------|--------------------------------------------------------------------------|
| 1  | Eligibility criteria            | <a href="#">#10</a>  | Inclusion and exclusion criteria for participants. If applicable, eligibility criteria for study centres and individuals who will perform the interventions (eg, surgeons, psychotherapists)                                                                                                                                                                                   | 6                                                                        |
| 2  |                                 |                      |                                                                                                                                                                                                                                                                                                                                                                                |                                                                          |
| 3  |                                 |                      |                                                                                                                                                                                                                                                                                                                                                                                |                                                                          |
| 4  |                                 |                      |                                                                                                                                                                                                                                                                                                                                                                                |                                                                          |
| 5  |                                 |                      |                                                                                                                                                                                                                                                                                                                                                                                |                                                                          |
| 6  |                                 |                      |                                                                                                                                                                                                                                                                                                                                                                                |                                                                          |
| 7  |                                 |                      |                                                                                                                                                                                                                                                                                                                                                                                |                                                                          |
| 8  | Interventions: description      | <a href="#">#11a</a> | Interventions for each group with sufficient detail to allow replication, including how and when they will be administered                                                                                                                                                                                                                                                     | 7-9                                                                      |
| 9  |                                 |                      |                                                                                                                                                                                                                                                                                                                                                                                |                                                                          |
| 10 |                                 |                      |                                                                                                                                                                                                                                                                                                                                                                                |                                                                          |
| 11 |                                 |                      |                                                                                                                                                                                                                                                                                                                                                                                |                                                                          |
| 12 |                                 |                      |                                                                                                                                                                                                                                                                                                                                                                                |                                                                          |
| 13 | Interventions: modifications    | <a href="#">#11b</a> | Criteria for discontinuing or modifying allocated interventions for a given trial participant (eg, drug dose change in response to harms, participant request, or improving / worsening disease)                                                                                                                                                                               | N/A Decisions related to the intervention are made by the clinical staff |
| 14 |                                 |                      |                                                                                                                                                                                                                                                                                                                                                                                |                                                                          |
| 15 |                                 |                      |                                                                                                                                                                                                                                                                                                                                                                                |                                                                          |
| 16 |                                 |                      |                                                                                                                                                                                                                                                                                                                                                                                |                                                                          |
| 17 |                                 |                      |                                                                                                                                                                                                                                                                                                                                                                                |                                                                          |
| 18 |                                 |                      |                                                                                                                                                                                                                                                                                                                                                                                |                                                                          |
| 19 |                                 |                      |                                                                                                                                                                                                                                                                                                                                                                                |                                                                          |
| 20 |                                 |                      |                                                                                                                                                                                                                                                                                                                                                                                |                                                                          |
| 21 | Interventions: adherence        | <a href="#">#11c</a> | Strategies to improve adherence to intervention protocols, and any procedures for monitoring adherence (eg, drug tablet return; laboratory tests)                                                                                                                                                                                                                              | 12-13                                                                    |
| 22 |                                 |                      |                                                                                                                                                                                                                                                                                                                                                                                |                                                                          |
| 23 |                                 |                      |                                                                                                                                                                                                                                                                                                                                                                                |                                                                          |
| 24 |                                 |                      |                                                                                                                                                                                                                                                                                                                                                                                |                                                                          |
| 25 |                                 |                      |                                                                                                                                                                                                                                                                                                                                                                                |                                                                          |
| 26 |                                 |                      |                                                                                                                                                                                                                                                                                                                                                                                |                                                                          |
| 27 |                                 |                      |                                                                                                                                                                                                                                                                                                                                                                                |                                                                          |
| 28 | Interventions: concomitant care | <a href="#">#11d</a> | Relevant concomitant care and interventions that are permitted or prohibited during the trial                                                                                                                                                                                                                                                                                  | 7                                                                        |
| 29 |                                 |                      |                                                                                                                                                                                                                                                                                                                                                                                |                                                                          |
| 30 |                                 |                      |                                                                                                                                                                                                                                                                                                                                                                                |                                                                          |
| 31 |                                 |                      |                                                                                                                                                                                                                                                                                                                                                                                |                                                                          |
| 32 | Outcomes                        | <a href="#">#12</a>  | Primary, secondary, and other outcomes, including the specific measurement variable (eg, systolic blood pressure), analysis metric (eg, change from baseline, final value, time to event), method of aggregation (eg, median, proportion), and time point for each outcome. Explanation of the clinical relevance of chosen efficacy and harm outcomes is strongly recommended | 9                                                                        |
| 33 |                                 |                      |                                                                                                                                                                                                                                                                                                                                                                                |                                                                          |
| 34 |                                 |                      |                                                                                                                                                                                                                                                                                                                                                                                |                                                                          |
| 35 |                                 |                      |                                                                                                                                                                                                                                                                                                                                                                                |                                                                          |
| 36 |                                 |                      |                                                                                                                                                                                                                                                                                                                                                                                |                                                                          |
| 37 |                                 |                      |                                                                                                                                                                                                                                                                                                                                                                                |                                                                          |
| 38 |                                 |                      |                                                                                                                                                                                                                                                                                                                                                                                |                                                                          |
| 39 |                                 |                      |                                                                                                                                                                                                                                                                                                                                                                                |                                                                          |
| 40 |                                 |                      |                                                                                                                                                                                                                                                                                                                                                                                |                                                                          |
| 41 |                                 |                      |                                                                                                                                                                                                                                                                                                                                                                                |                                                                          |
| 42 |                                 |                      |                                                                                                                                                                                                                                                                                                                                                                                |                                                                          |
| 43 |                                 |                      |                                                                                                                                                                                                                                                                                                                                                                                |                                                                          |
| 44 |                                 |                      |                                                                                                                                                                                                                                                                                                                                                                                |                                                                          |
| 45 | Participant timeline            | <a href="#">#13</a>  | Time schedule of enrolment, interventions (including any run-ins and washouts), assessments, and visits for participants. A schematic diagram is highly recommended (see Figure)                                                                                                                                                                                               | 7                                                                        |
| 46 |                                 |                      |                                                                                                                                                                                                                                                                                                                                                                                |                                                                          |
| 47 |                                 |                      |                                                                                                                                                                                                                                                                                                                                                                                |                                                                          |
| 48 |                                 |                      |                                                                                                                                                                                                                                                                                                                                                                                |                                                                          |
| 49 |                                 |                      |                                                                                                                                                                                                                                                                                                                                                                                |                                                                          |
| 50 |                                 |                      |                                                                                                                                                                                                                                                                                                                                                                                |                                                                          |
| 51 |                                 |                      |                                                                                                                                                                                                                                                                                                                                                                                |                                                                          |
| 52 |                                 |                      |                                                                                                                                                                                                                                                                                                                                                                                |                                                                          |
| 53 | Sample size                     | <a href="#">#14</a>  | Estimated number of participants needed to achieve study objectives and how it was determined, including clinical and statistical                                                                                                                                                                                                                                              | 7                                                                        |
| 54 |                                 |                      |                                                                                                                                                                                                                                                                                                                                                                                |                                                                          |
| 55 |                                 |                      |                                                                                                                                                                                                                                                                                                                                                                                |                                                                          |
| 56 |                                 |                      |                                                                                                                                                                                                                                                                                                                                                                                |                                                                          |
| 57 |                                 |                      |                                                                                                                                                                                                                                                                                                                                                                                |                                                                          |
| 58 |                                 |                      |                                                                                                                                                                                                                                                                                                                                                                                |                                                                          |
| 59 |                                 |                      |                                                                                                                                                                                                                                                                                                                                                                                |                                                                          |
| 60 |                                 |                      |                                                                                                                                                                                                                                                                                                                                                                                |                                                                          |

|    |                      |                                                                                                         |             |
|----|----------------------|---------------------------------------------------------------------------------------------------------|-------------|
|    |                      | assumptions supporting any sample size calculations                                                     |             |
| 1  |                      |                                                                                                         |             |
| 2  |                      |                                                                                                         |             |
| 3  |                      |                                                                                                         |             |
| 4  | Recruitment          | <a href="#">#15</a> Strategies for achieving adequate participant enrolment to reach target sample size | 6           |
| 5  |                      |                                                                                                         |             |
| 6  |                      |                                                                                                         |             |
| 7  |                      |                                                                                                         |             |
| 8  | Allocation:          | <a href="#">#16a</a> Method of generating the allocation sequence                                       | N/A due to  |
| 9  | sequence             | (eg, computer-generated random numbers), and                                                            | consecutive |
| 10 | generation           | list of any factors for stratification. To reduce                                                       | enrollment  |
| 11 |                      | predictability of a random sequence, details of                                                         |             |
| 12 |                      | any planned restriction (eg, blocking) should be                                                        |             |
| 13 |                      | provided in a separate document that is                                                                 |             |
| 14 |                      | unavailable to those who enrol participants or                                                          |             |
| 15 |                      | assign interventions                                                                                    |             |
| 16 |                      |                                                                                                         |             |
| 17 |                      |                                                                                                         |             |
| 18 |                      |                                                                                                         |             |
| 19 |                      |                                                                                                         |             |
| 20 | Allocation           | <a href="#">#16b</a> Mechanism of implementing the allocation                                           | N/A due to  |
| 21 | concealment          | sequence (eg, central telephone; sequentially                                                           | consecutive |
| 22 | mechanism            | numbered, opaque, sealed envelopes),                                                                    | enrollment  |
| 23 |                      | describing any steps to conceal the sequence                                                            |             |
| 24 |                      | until interventions are assigned                                                                        |             |
| 25 |                      |                                                                                                         |             |
| 26 |                      |                                                                                                         |             |
| 27 |                      |                                                                                                         |             |
| 28 |                      |                                                                                                         |             |
| 29 | Allocation:          | <a href="#">#16c</a> Who will generate the allocation sequence, who                                     | N/A due to  |
| 30 | implementation       | will enrol participants, and who will assign                                                            | consecutive |
| 31 |                      | participants to interventions                                                                           | enrollment  |
| 32 |                      |                                                                                                         |             |
| 33 |                      |                                                                                                         |             |
| 34 | Blinding (masking)   | <a href="#">#17a</a> Who will be blinded after assignment to                                            | N/A due to  |
| 35 |                      | interventions (eg, trial participants, care                                                             | consecutive |
| 36 |                      | providers, outcome assessors, data analysts),                                                           | enrollment  |
| 37 |                      | and how                                                                                                 |             |
| 38 |                      |                                                                                                         |             |
| 39 |                      |                                                                                                         |             |
| 40 |                      |                                                                                                         |             |
| 41 | Blinding (masking):  | <a href="#">#17b</a> If blinded, circumstances under which unblinding                                   | N/A due to  |
| 42 | emergency            | is permissible, and procedure for revealing a                                                           | consecutive |
| 43 | unblinding           | participant's allocated intervention during the trial                                                   | enrollment  |
| 44 |                      |                                                                                                         |             |
| 45 |                      |                                                                                                         |             |
| 46 | Data collection plan | <a href="#">#18a</a> Plans for assessment and collection of outcome,                                    | 9           |
| 47 |                      | baseline, and other trial data, including any                                                           |             |
| 48 |                      | related processes to promote data quality (eg,                                                          |             |
| 49 |                      | duplicate measurements, training of assessors)                                                          |             |
| 50 |                      | and a description of study instruments (eg,                                                             |             |
| 51 |                      | questionnaires, laboratory tests) along with their                                                      |             |
| 52 |                      | reliability and validity, if known. Reference to                                                        |             |
| 53 |                      | where data collection forms can be found, if not                                                        |             |
| 54 |                      | in the protocol                                                                                         |             |
| 55 |                      |                                                                                                         |             |
| 56 |                      |                                                                                                         |             |
| 57 |                      |                                                                                                         |             |
| 58 |                      |                                                                                                         |             |
| 59 |                      |                                                                                                         |             |
| 60 |                      |                                                                                                         |             |

|    |                      |                      |                                                    |     |
|----|----------------------|----------------------|----------------------------------------------------|-----|
| 1  | Data collection      | <a href="#">#18b</a> | Plans to promote participant retention and         | 13  |
| 2  | plan: retention      |                      | complete follow-up, including list of any outcome  |     |
| 3  |                      |                      | data to be collected for participants who          |     |
| 4  |                      |                      | discontinue or deviate from intervention protocols |     |
| 5  |                      |                      |                                                    |     |
| 6  |                      |                      |                                                    |     |
| 7  |                      |                      |                                                    |     |
| 8  | Data management      | <a href="#">#19</a>  | Plans for data entry, coding, security, and        | 11  |
| 9  |                      |                      | storage, including any related processes to        |     |
| 10 |                      |                      | promote data quality (eg, double data entry;       |     |
| 11 |                      |                      | range checks for data values). Reference to        |     |
| 12 |                      |                      | where details of data management procedures        |     |
| 13 |                      |                      | can be found, if not in the protocol               |     |
| 14 |                      |                      |                                                    |     |
| 15 |                      |                      |                                                    |     |
| 16 |                      |                      |                                                    |     |
| 17 | Statistics:          | <a href="#">#20a</a> | Statistical methods for analysing primary and      | 11  |
| 18 | outcomes             |                      | secondary outcomes. Reference to where other       |     |
| 19 |                      |                      | details of the statistical analysis plan can be    |     |
| 20 |                      |                      | found, if not in the protocol                      |     |
| 21 |                      |                      |                                                    |     |
| 22 |                      |                      |                                                    |     |
| 23 |                      |                      |                                                    |     |
| 24 | Statistics:          | <a href="#">#20b</a> | Methods for any additional analyses (eg,           | 11  |
| 25 | additional analyses  |                      | subgroup and adjusted analyses)                    |     |
| 26 |                      |                      |                                                    |     |
| 27 |                      |                      |                                                    |     |
| 28 | Statistics: analysis | <a href="#">#20c</a> | Definition of analysis population relating to      | -   |
| 29 | population and       |                      | protocol non-adherence (eg, as randomised          |     |
| 30 | missing data         |                      | analysis), and any statistical methods to handle   |     |
| 31 |                      |                      | missing data (eg, multiple imputation)             |     |
| 32 |                      |                      |                                                    |     |
| 33 |                      |                      |                                                    |     |
| 34 |                      |                      |                                                    |     |
| 35 | Data monitoring:     | <a href="#">#21a</a> | Composition of data monitoring committee           | 11  |
| 36 | formal committee     |                      | (DMC); summary of its role and reporting           |     |
| 37 |                      |                      | structure; statement of whether it is independent  |     |
| 38 |                      |                      | from the sponsor and competing interests; and      |     |
| 39 |                      |                      | reference to where further details about its       |     |
| 40 |                      |                      | charter can be found, if not in the protocol.      |     |
| 41 |                      |                      | Alternatively, an explanation of why a DMC is not  |     |
| 42 |                      |                      | needed                                             |     |
| 43 |                      |                      |                                                    |     |
| 44 |                      |                      |                                                    |     |
| 45 |                      |                      |                                                    |     |
| 46 |                      |                      |                                                    |     |
| 47 |                      |                      |                                                    |     |
| 48 | Data monitoring:     | <a href="#">#21b</a> | Description of any interim analyses and stopping   | N/A |
| 49 | interim analysis     |                      | guidelines, including who will have access to      |     |
| 50 |                      |                      | these interim results and make the final decision  |     |
| 51 |                      |                      | to terminate the trial                             |     |
| 52 |                      |                      |                                                    |     |
| 53 |                      |                      |                                                    |     |
| 54 |                      |                      |                                                    |     |
| 55 |                      |                      |                                                    |     |
| 56 |                      |                      |                                                    |     |
| 57 |                      |                      |                                                    |     |
| 58 |                      |                      |                                                    |     |
| 59 |                      |                      |                                                    |     |
| 60 |                      |                      |                                                    |     |

|    |                                      |                      |                                                                                                                                                                                                                                    |     |
|----|--------------------------------------|----------------------|------------------------------------------------------------------------------------------------------------------------------------------------------------------------------------------------------------------------------------|-----|
| 1  | Harms                                | <a href="#">#22</a>  | Plans for collecting, assessing, reporting, and managing solicited and spontaneously reported adverse events and other unintended effects of trial interventions or trial conduct                                                  | 11  |
| 2  |                                      |                      |                                                                                                                                                                                                                                    |     |
| 3  |                                      |                      |                                                                                                                                                                                                                                    |     |
| 4  |                                      |                      |                                                                                                                                                                                                                                    |     |
| 5  |                                      |                      |                                                                                                                                                                                                                                    |     |
| 6  |                                      |                      |                                                                                                                                                                                                                                    |     |
| 7  |                                      |                      |                                                                                                                                                                                                                                    |     |
| 8  | Auditing                             | <a href="#">#23</a>  | Frequency and procedures for auditing trial conduct, if any, and whether the process will be independent from investigators and the sponsor                                                                                        | N/A |
| 9  |                                      |                      |                                                                                                                                                                                                                                    |     |
| 10 |                                      |                      |                                                                                                                                                                                                                                    |     |
| 11 |                                      |                      |                                                                                                                                                                                                                                    |     |
| 12 |                                      |                      |                                                                                                                                                                                                                                    |     |
| 13 | Research ethics approval             | <a href="#">#24</a>  | Plans for seeking research ethics committee / institutional review board (REC / IRB) approval                                                                                                                                      | 3   |
| 14 |                                      |                      |                                                                                                                                                                                                                                    |     |
| 15 |                                      |                      |                                                                                                                                                                                                                                    |     |
| 16 |                                      |                      |                                                                                                                                                                                                                                    |     |
| 17 | Protocol amendments                  | <a href="#">#25</a>  | Plans for communicating important protocol modifications (eg, changes to eligibility criteria, outcomes, analyses) to relevant parties (eg, investigators, REC / IRBs, trial participants, trial registries, journals, regulators) | 3   |
| 18 |                                      |                      |                                                                                                                                                                                                                                    |     |
| 19 |                                      |                      |                                                                                                                                                                                                                                    |     |
| 20 |                                      |                      |                                                                                                                                                                                                                                    |     |
| 21 |                                      |                      |                                                                                                                                                                                                                                    |     |
| 22 |                                      |                      |                                                                                                                                                                                                                                    |     |
| 23 |                                      |                      |                                                                                                                                                                                                                                    |     |
| 24 |                                      |                      |                                                                                                                                                                                                                                    |     |
| 25 | Consent or assent                    | <a href="#">#26a</a> | Who will obtain informed consent or assent from potential trial participants or authorised surrogates, and how (see Item 32)                                                                                                       | 3   |
| 26 |                                      |                      |                                                                                                                                                                                                                                    |     |
| 27 |                                      |                      |                                                                                                                                                                                                                                    |     |
| 28 |                                      |                      |                                                                                                                                                                                                                                    |     |
| 29 |                                      |                      |                                                                                                                                                                                                                                    |     |
| 30 | Consent or assent: ancillary studies | <a href="#">#26b</a> | Additional consent provisions for collection and use of participant data and biological specimens in ancillary studies, if applicable                                                                                              | N/A |
| 31 |                                      |                      |                                                                                                                                                                                                                                    |     |
| 32 |                                      |                      |                                                                                                                                                                                                                                    |     |
| 33 |                                      |                      |                                                                                                                                                                                                                                    |     |
| 34 |                                      |                      |                                                                                                                                                                                                                                    |     |
| 35 |                                      |                      |                                                                                                                                                                                                                                    |     |
| 36 | Confidentiality                      | <a href="#">#27</a>  | How personal information about potential and enrolled participants will be collected, shared, and maintained in order to protect confidentiality before, during, and after the trial                                               | 11  |
| 37 |                                      |                      |                                                                                                                                                                                                                                    |     |
| 38 |                                      |                      |                                                                                                                                                                                                                                    |     |
| 39 |                                      |                      |                                                                                                                                                                                                                                    |     |
| 40 |                                      |                      |                                                                                                                                                                                                                                    |     |
| 41 |                                      |                      |                                                                                                                                                                                                                                    |     |
| 42 |                                      |                      |                                                                                                                                                                                                                                    |     |
| 43 | Declaration of interests             | <a href="#">#28</a>  | Financial and other competing interests for principal investigators for the overall trial and each study site                                                                                                                      | 13  |
| 44 |                                      |                      |                                                                                                                                                                                                                                    |     |
| 45 |                                      |                      |                                                                                                                                                                                                                                    |     |
| 46 |                                      |                      |                                                                                                                                                                                                                                    |     |
| 47 |                                      |                      |                                                                                                                                                                                                                                    |     |
| 48 | Data access                          | <a href="#">#29</a>  | Statement of who will have access to the final trial dataset, and disclosure of contractual agreements that limit such access for investigators                                                                                    | 11  |
| 49 |                                      |                      |                                                                                                                                                                                                                                    |     |
| 50 |                                      |                      |                                                                                                                                                                                                                                    |     |
| 51 |                                      |                      |                                                                                                                                                                                                                                    |     |
| 52 |                                      |                      |                                                                                                                                                                                                                                    |     |
| 53 |                                      |                      |                                                                                                                                                                                                                                    |     |
| 54 |                                      |                      |                                                                                                                                                                                                                                    |     |
| 55 | Ancillary and post trial care        | <a href="#">#30</a>  | Provisions, if any, for ancillary and post-trial care, and for compensation to those who suffer harm from trial participation                                                                                                      | 11  |
| 56 |                                      |                      |                                                                                                                                                                                                                                    |     |
| 57 |                                      |                      |                                                                                                                                                                                                                                    |     |
| 58 |                                      |                      |                                                                                                                                                                                                                                    |     |
| 59 |                                      |                      |                                                                                                                                                                                                                                    |     |
| 60 |                                      |                      |                                                                                                                                                                                                                                    |     |

|    |                       |                      |                                                       |    |
|----|-----------------------|----------------------|-------------------------------------------------------|----|
| 1  | Dissemination         | <a href="#">#31a</a> | Plans for investigators and sponsor to                | 3  |
| 2  | policy: trial results |                      | communicate trial results to participants,            |    |
| 3  |                       |                      | healthcare professionals, the public, and other       |    |
| 4  |                       |                      | relevant groups (eg, via publication, reporting in    |    |
| 5  |                       |                      | results databases, or other data sharing              |    |
| 6  |                       |                      | arrangements), including any publication              |    |
| 7  |                       |                      | restrictions                                          |    |
| 8  |                       |                      |                                                       |    |
| 9  |                       |                      |                                                       |    |
| 10 |                       |                      |                                                       |    |
| 11 |                       |                      |                                                       |    |
| 12 | Dissemination         | <a href="#">#31b</a> | Authorship eligibility guidelines and any intended    | 13 |
| 13 | policy: authorship    |                      | use of professional writers                           |    |
| 14 |                       |                      |                                                       |    |
| 15 |                       |                      |                                                       |    |
| 16 | Dissemination         | <a href="#">#31c</a> | Plans, if any, for granting public access to the full | 11 |
| 17 | policy: reproducible  |                      | protocol, participant-level dataset, and statistical  |    |
| 18 | research              |                      | code                                                  |    |
| 19 |                       |                      |                                                       |    |
| 20 |                       |                      |                                                       |    |
| 21 | Informed consent      | <a href="#">#32</a>  | Model consent form and other related                  | 3  |
| 22 | materials             |                      | documentation given to participants and               |    |
| 23 |                       |                      | authorised surrogates                                 |    |
| 24 |                       |                      |                                                       |    |
| 25 |                       |                      |                                                       |    |
| 26 |                       |                      |                                                       |    |
| 27 | Biological            | <a href="#">#33</a>  | Plans for collection, laboratory evaluation, and      | 9  |
| 28 | specimens             |                      | storage of biological specimens for genetic or        |    |
| 29 |                       |                      | molecular analysis in the current trial and for       |    |
| 30 |                       |                      | future use in ancillary studies, if applicable        |    |
| 31 |                       |                      |                                                       |    |
| 32 |                       |                      |                                                       |    |

33 The SPIRIT checklist is distributed under the terms of the Creative Commons Attribution License CC-  
 34 BY-ND 3.0. This checklist can be completed online using <https://www.goodreports.org/>, a tool made  
 35 by the [EQUATOR Network](#) in collaboration with [Penelope.ai](#)  
 36  
 37  
 38  
 39  
 40  
 41  
 42  
 43  
 44  
 45  
 46  
 47  
 48  
 49  
 50  
 51  
 52  
 53  
 54  
 55  
 56  
 57  
 58  
 59  
 60

# BMJ Open

## Health promotion and cardiovascular risk reduction in people with spinal cord injury - physical activity, healthy diet and maintenance after discharge: study protocol for a prospective national cohort study and pre-post intervention study

|                                 |                                                                                                                                                                                                                                                                                                                                                                                                                                                                                                                                                                                                                                                     |
|---------------------------------|-----------------------------------------------------------------------------------------------------------------------------------------------------------------------------------------------------------------------------------------------------------------------------------------------------------------------------------------------------------------------------------------------------------------------------------------------------------------------------------------------------------------------------------------------------------------------------------------------------------------------------------------------------|
| Journal:                        | <i>BMJ Open</i>                                                                                                                                                                                                                                                                                                                                                                                                                                                                                                                                                                                                                                     |
| Manuscript ID                   | bmjopen-2019-030310.R1                                                                                                                                                                                                                                                                                                                                                                                                                                                                                                                                                                                                                              |
| Article Type:                   | Protocol                                                                                                                                                                                                                                                                                                                                                                                                                                                                                                                                                                                                                                            |
| Date Submitted by the Author:   | 25-Sep-2019                                                                                                                                                                                                                                                                                                                                                                                                                                                                                                                                                                                                                                         |
| Complete List of Authors:       | Holm, Nicolaj; Rigshospitalet, Neuroscience Center, Clinic for Spinal Cord Injuries<br>Møller, Tom; The University Hospitals Centre for Health Research, UCSF Copenhagen University Hospital Rigshospitalet , Department 9701<br>Adamsen, Lis; The University Hospitals Centre for Health Research, UCSF Copenhagen University Hospital Rigshospitalet , Department 9701<br>Dalsgaard, Line; Rigshospitalet, Neuroscience Center, Clinic for Spinal Cord Injuries<br>Biering-Sorensen, Fin; Rigshospitalet, Neuroscience Center, Clinic for Spinal Cord Injuries<br>Schou, Lone; University College Copenhagen, Department of Nursing and Nutrition |
| <b>Primary Subject Heading</b>: | Rehabilitation medicine                                                                                                                                                                                                                                                                                                                                                                                                                                                                                                                                                                                                                             |
| Secondary Subject Heading:      | Neurology                                                                                                                                                                                                                                                                                                                                                                                                                                                                                                                                                                                                                                           |
| Keywords:                       | Spinal Cord Injuries, Metabolic Syndrome, Health Promotion, Exercise, Diet Therapy                                                                                                                                                                                                                                                                                                                                                                                                                                                                                                                                                                  |
|                                 |                                                                                                                                                                                                                                                                                                                                                                                                                                                                                                                                                                                                                                                     |

SCHOLARONE™  
Manuscripts

1  
2  
3  
4  
5  
6  
7  
8  
9  
10  
11  
12  
13  
14  
15  
16  
17  
18  
19  
20  
21  
22  
23  
24  
25  
26  
27  
28  
29  
30  
31  
32  
33  
34  
35  
36  
37  
38  
39  
40  
41  
42  
43  
44  
45  
46  
47  
48  
49  
50  
51  
52  
53  
54  
55  
56  
57  
58  
59  
60

1 **TITLE PAGE**

2 Health promotion and cardiovascular risk reduction in people with spinal cord injury  
3 - physical activity, healthy diet and maintenance after discharge: study protocol for a  
4 prospective national cohort study and pre-post intervention study

5 Authors:

6 Nicolaj Jersild Holm ([nicolaj.jersild.holm@regionh.dk](mailto:nicolaj.jersild.holm@regionh.dk)), Tom Møller ([tom@ucsf.dk](mailto:tom@ucsf.dk)), Lis Adamsen  
7 ([la@ucsf.dk](mailto:la@ucsf.dk)), Line Dalsgaard ([line.trine.dalsgaard@regionh.dk](mailto:line.trine.dalsgaard@regionh.dk)), Fin Biering-Sørensen ([fin.biering-soerensen@regionh.dk](mailto:fin.biering-soerensen@regionh.dk)), Lone Helle Schou ([lohs@kp.dk](mailto:lohs@kp.dk))

9 Keywords: Spinal Cord Injuries, Metabolic Syndrome, Health Promotion, Exercise, Diet Therapy

10 Corresponding Author: Nicolaj Jersild Holm ([nicolaj.jersild.holm@regionh.dk](mailto:nicolaj.jersild.holm@regionh.dk)), phone: +45  
11 38631963, Rigshospitalet, Neuroscience Center, Clinic for Spinal Cord Injuries, Havnevej 25, 3100,  
12 Hornbæk, Denmark

13 Word count: 6.155

Version: 2.2 date: 05.08.19

### ABSTRACT

**Introduction** Spinal cord injury (SCI) predisposes those who suffer from it to physical inactivity and weight gain; consequently, death due to cardiovascular diseases is more frequent among people with SCI than in the general population. The literature documents a consensus about an interdisciplinary multimodal approach for the prevention and treatment of cardiovascular risk factors including overweight and obesity in people with SCI, focusing on diet, physical activity (PA) and behavioral interventions. This study will investigate implementation of recommendations from a recent clinical practice guideline for identification and management of cardiometabolic risk after SCI through multimodal patient education in a subacute clinical setting.

**Methods and analysis** All patients who are aged 18 years or older with an SCI within the previous 12 months and admitted to highly specialized rehabilitation are included, regardless of SCI etiology or neurological level. A primary study designed as a controlled pre-post pragmatic intervention study with 6-month follow up evaluates the effect of the clinical intervention; a prospective national cohort study on body mass index (BMI) serves as a historical control. The intervention consists of a standardized approach to patient education about cardiovascular risk factors, PA and a healthy diet that begins at the outset of primary SCI rehabilitation and is integrated into existing settings and workflows. Outcome measures are collected at admission, discharge and 6 months after discharge and include VO<sub>2</sub>peak (primary outcome), BMI, body composition, metabolic profile, neurologic status, level of functioning, depression, quality of life, objective PA (accelerometry), self-reported PA, self-assessed physical activity ability, shared decision making, and dietary habits. Test-retest reliability of four VO<sub>2</sub>peak test protocols are investigated, as is test-retest reliability of a multisensor accelerometer in a rehabilitation setting.

### Ethics and dissemination

The principal investigator obtains Informed consent from all participants. The interventions in the project are closely related to existing rehabilitation care, and the risk of pain and discomfort is considered modest. Any unintended events related to the elements of the intervention are reported, according to existing regional procedures. Data are stored in a secure web-based database (Redcap). The primary study and prospective cohort study are registered at Clinicaltrials.gov. Positive and negative results will be submitted to relevant scientific journals related to SCI for publication. Important protocol modifications are reported to the Committees on Health Research Ethics in the Capital Region of Denmark.

### Article summary

#### **Strengths and limitations of this study**

The prospective cohort study includes both SCI centers in Denmark and the intervention study includes all newly injured people with SCI admitted to rehabilitation at the East Denmark SCI-center.

Four predefined protocols for assessing VO<sub>2</sub>peak are used due to the heterogeneity of functional level in the SCI population.



1  
2  
3  
4 1 The pre-post intervention study is based on a pragmatic real-life approach by including existing settings and  
5 2 work flows, which is a strength, but consistent implementation of multimodal interventions may be  
6 3 challenging due to changes in the clinical setting.

8  
9 4 Lack of randomization is a study limitation.

10  
11 5 **Registration details**

12  
13 6 The project is approved by the Committees on Health Research Ethics in the Capital Region of Denmark on  
14 7 10.07.2018 (Journal-nr.: H-18018325) and the Danish Data Protection Agency (j.nr. VD-2018-380, I-Suite nr.:  
15 8 6631) and (RH-2017-345, I-Suite nr.: 06052). The project is registered at Clinicaltrials.gov (NCT03689023)  
16 9 and (NCT03369080). See the World Health Organization Trial Registration Data Set in table 1.  
17  
18  
19  
20

21 11 **Table 1.** World Health Organization Trial Registration Data Set (Version 1.3.1)

| Data category                                 | Information <sup>32</sup>                                                                                                                                                                                                                                                                                                                                                                          |
|-----------------------------------------------|----------------------------------------------------------------------------------------------------------------------------------------------------------------------------------------------------------------------------------------------------------------------------------------------------------------------------------------------------------------------------------------------------|
| Primary registry and trial identifying number | ClinicalTrials.gov (NCT03369080) and (NCT03689023).                                                                                                                                                                                                                                                                                                                                                |
| Date of registration in primary registry      | 12.11.2017 and 26.09.2018                                                                                                                                                                                                                                                                                                                                                                          |
| Secondary identifying numbers                 | The Committees on Health Research Ethics in the Capital Region of Denmark on 10.07.2018 (Journal-nr.: H-18018325) and the Danish Data Protection Agency (j.nr. VD-2018-380, I-Suite nr.: 6631) and (RH-2017-345, I-Suite nr.: 06052)                                                                                                                                                               |
| Source(s) of monetary or material support     | This work was supported by a mutual cooperation about the research program "Centre for Integrated Rehabilitation of Cancer Patients (CIRE) - Neuro/Psychology", between the University Hospitals Centre for Health Care Research, University hospital Copenhagen, Rigshospitalet, University College Copenhagen, Department of Nursing and Nutrition, and the NeuroScience Centre, Rigshospitalet. |
| Primary sponsor                               | This work was supported by a mutual cooperation about the research program "Centre for Integrated Rehabilitation of Cancer Patients (CIRE) - Neuro/Psychology", between the University Hospitals Centre for Health Care Research, University hospital Copenhagen, Rigshospitalet, University College Copenhagen, Department of Nursing and Nutrition, and the NeuroScience Centre, Rigshospitalet. |

|                                           |                                                                                                                                                                                                                                                                                                                                                                                                                                                                                                                |
|-------------------------------------------|----------------------------------------------------------------------------------------------------------------------------------------------------------------------------------------------------------------------------------------------------------------------------------------------------------------------------------------------------------------------------------------------------------------------------------------------------------------------------------------------------------------|
|                                           |                                                                                                                                                                                                                                                                                                                                                                                                                                                                                                                |
| Secondary sponsor(s)                      |                                                                                                                                                                                                                                                                                                                                                                                                                                                                                                                |
| Contact for public queries                | Nicolaj Jersild Holm ( <a href="mailto:nicolaj.jersild.holm@regionh.dk">nicolaj.jersild.holm@regionh.dk</a> ), phone: +45 38631963, Rigshospitalet, Neuroscience Center, Clinic for Spinal Cord Injuries, Havnevej 25, 3100, Hornbæk, Denmark                                                                                                                                                                                                                                                                  |
| Contact for scientific queries            | Nicolaj Jersild Holm ( <a href="mailto:nicolaj.jersild.holm@regionh.dk">nicolaj.jersild.holm@regionh.dk</a> ), phone: +45 38631963, Rigshospitalet, Neuroscience Center, Clinic for Spinal Cord Injuries, Havnevej 25, 3100, Hornbæk, Denmark                                                                                                                                                                                                                                                                  |
| Public title                              | Health promotion and cardiovascular risk reduction in people with spinal cord injury - physical activity, healthy diet and maintenance after discharge: study protocol for a national cohort study followed by a clinical intervention study.                                                                                                                                                                                                                                                                  |
| Scientific title                          | Health promotion and cardiovascular risk reduction in people with spinal cord injury - physical activity, healthy diet and maintenance after discharge: study protocol for a prospective national cohort study followed by a pre-post intervention study.                                                                                                                                                                                                                                                      |
| Countries of recruitment                  | Denmark                                                                                                                                                                                                                                                                                                                                                                                                                                                                                                        |
| Health condition(s) or problem(s) studied | Spinal Cord Injury and the cardiovascular risk factor, including weight gain and consequences of an inactive lifestyle during and after the primary rehabilitation.                                                                                                                                                                                                                                                                                                                                            |
| Intervention(s)                           | <p>A controlled pre-post multi modal pragmatic clinical intervention study, with 6-months of follow up containing “new usual care” consisting of a uniform and systematic institutional strategy incorporating targeted strategic patient education about cardiovascular risk factors, physical activity and a healthy diet lifestyle starting early in the primary rehabilitation process.</p> <p>Comparator: A historic control conducted as a national prospective cohort study before “new usual care”</p> |
| Key inclusion and exclusion criteria      | Inclusion criteria: All patients who are 18 years or older, and with a Spinal Cord Injury (SCI) within the last 12 months and admitted at Clinic for Spinal Cord                                                                                                                                                                                                                                                                                                                                               |

|                         |                                                                                                                                                                                                                                                                                                                                                                                          |
|-------------------------|------------------------------------------------------------------------------------------------------------------------------------------------------------------------------------------------------------------------------------------------------------------------------------------------------------------------------------------------------------------------------------------|
|                         | Injuries, are included regardless of etiology to the SCI, neurological level or completeness of the lesion if informed consent is retrieved.                                                                                                                                                                                                                                             |
|                         | Exclusion criteria: Exclusion criteria for VO <sub>2</sub> peak test in the study includes motor complete SCI at C4 level or above, and assisted ventilatory function. Other exclusion criteria are the presence of decubitus, severe spasticity or musculoskeletal problems considered at risk of aggravation during testing or preventing completion of the VO <sub>2</sub> peak test. |
| Study type              | Interventional. The study consists of a primary study designed as a controlled pre-post clinical intervention study and a historic control conducted as a prospective cohort study.                                                                                                                                                                                                      |
|                         | Allocation: The intervention in the primary study is a part of new standard care. Therefore randomization or blinding is not appropriate.                                                                                                                                                                                                                                                |
|                         | Primary purpose: prevention                                                                                                                                                                                                                                                                                                                                                              |
| Date of first enrolment | November 2017                                                                                                                                                                                                                                                                                                                                                                            |
| Target sample size      | 160                                                                                                                                                                                                                                                                                                                                                                                      |
| Recruitment status      | Recruiting                                                                                                                                                                                                                                                                                                                                                                               |
| Primary outcome(s)      | Oxygen uptake measured as VO <sub>2</sub> peak.                                                                                                                                                                                                                                                                                                                                          |
| Key secondary outcomes  | Body Mass Index, Body composition (determined by Dual energy x-ray absorptiometry), metabolic profile consisting of CRP as a marker for inflammation, lipid profile describing Total cholesterol, Triglycerides, HDL cholesterol, and LDL cholesterol and Hemoglobin A1c as a marker for carbohydrate metabolism, and blood pressure (BP).                                               |
| Ethics Review           | The project is approved by the Committees on Health Research Ethics in the Capital Region of Denmark on 10.07.2018 (Journal-nr.: H-18018325)                                                                                                                                                                                                                                             |
| Completion data         | June 2020                                                                                                                                                                                                                                                                                                                                                                                |
| IPD sharing statement   | Data can be accessed by request to the corresponding author after publications related to the Ph.D project are made.                                                                                                                                                                                                                                                                     |

## 1 INTRODUCTION

2 The annual incidence of traumatic spinal cord injury (SCI) in Denmark is 10-15 per million [1], while  
3 nontraumatic SCI has accounted for approximately 60% of all newly injured patients admitted to the two  
4 SCI centers in Denmark in recent years. SCI is a life-changing event that may affect all bodily functions  
5 below the level of the lesion, requiring highly specialized interdisciplinary rehabilitation aiming at the  
6 highest possible level of independent functioning and resulting in significant costs to affected individuals  
7 and society. Rehabilitation at the Clinic for Spinal Cord Injuries in Eastern Denmark (CSCI) generally includes  
8 functional training, strength training, cardiovascular exercise and fine motor training of the upper  
9 extremities. In addition, circulation, respiration, thermoregulation, bowel and bladder function, skin  
10 integrity, pain and spasticity are continually assessed and addressed, and aids are provided to compensate  
11 for functional losses, including communication aids and splinting. Counseling to address social and  
12 economic issues, sexual function and psychological issues is provided.

13 Over the long term, SCI and resulting impairments predispose affected individuals to increased  
14 cardiovascular risk and premature cardiovascular death; a clinical practice guideline addressing  
15 cardiometabolic disease after SCI was recently published [2]. However, targeted patient education  
16 addressing long-term cardiovascular risk, based on individualized face-to-face interaction between patients  
17 and health care professionals and aiming at a core clinical outcome, is not systematically integrated into  
18 early stages of specialized SCI rehabilitation at CSCI, even though an opportunity may exist to target the link  
19 between injury-related immediate impacts on functionality and long-term health consequences [3 4].  
20 Similarly, health promotion education and activities related to body mass index (BMI), diet, smoking,  
21 alcohol intake and physical activity (PA) are not systematically provided, and assessment of physical  
22 capacity, metabolic profile and body composition is not a part of standard care. A systematic approach  
23 may ensure that all patients at CSCI receive information and knowledge related to health promotion and  
24 the risk of cardiovascular disease, which may support patient adaptation and adherence to recommended  
25 PA and healthy diet.

26 As a result, cardiovascular risk factors, including weight gain and the consequences of an inactive lifestyle  
27 during and after primary rehabilitation, are the focus of the current study.

### 28 **The course of overweight**

29 The prevalence of overweight in people with SCI is conservatively estimated at 66%. Overweight has been  
30 found to be one of the most common cardiometabolic risk factors among people with SCI, increasing the  
31 cardiovascular risk profile of wheelchair-dependent people with paraplegia [5], [6] [7 8]. Energy  
32 expenditure decreases significantly after sustaining a SCI and remains low. Although body fat and body  
33 weight decrease in the acute injury phase, they increase in the subacute phase, and a loss of lean body  
34 mass in the lower extremities and trunk has been observed during the first year after injury [9]. BMI  
35 increases gradually during the first years after discharge from primary rehabilitation [10]. Obese people  
36 with SCI achieve a lower level of functioning during primary rehabilitation than do those of normal weight  
37 [11]. Overweight in people with SCI is associated with increased risk of depression [12]. Nutritional  
38 education delivered by a dietician or lifestyle coach has been found promising [13-15], although it is often  
39 not offered in a clinical setting [16]. Increased knowledge about weight management among clinicians is

1  
2  
3  
4 1 recommended, but weight management is often not prioritized in rehabilitation settings. Clinicians have  
5 2 called for evidence-based knowledge and clinical guidelines [16 17].  
6

### 7 3 **Impact of physical activity on health and fitness**

8  
9  
10 4 In the general population, PA is associated with beneficial effects on diseases contributing to the metabolic  
11 5 syndrome, and its beneficial effect increases when it is combined with diet therapy [18]. Similar effects of  
12 6 PA among people with SCI have been described; numerous studies have reported the positive effects of PA  
13 7 intervention programs in people with both acute and chronic SCI on physical capacity, strength and  
14 8 functional performance, including the effect of exercise interventions on cardiometabolic health [19 20].  
15 9 Evidence-based exercise guidelines for cardiometabolic health in people with SCI recommend a minimum  
16 10 of 30 minutes of moderate to vigorous aerobic exercise three times weekly to reduce cardiovascular risk  
17 11 factors [21]. The long-term effect increases when PA is combined with behavioral interventions [22].  
18 12 However, not all people with SCI are able to participate in PA intervention programs or maintain PA. Rates  
19 13 of participation in leisure time PA and in sports activities after discharge from primary rehabilitation are low  
20 14 among people with SCI [23 24]. Intra- and extrapersonal factors influence participation in PA, including self-  
21 15 efficacy related to being physically active [25]. PA alone is insufficient to induce weight loss in people with  
22 16 SCI [2]. Therefore, a broader approach to cardiovascular risk reduction may be appropriate, and a  
23 17 combination of several interventions is required to promote a physically active lifestyle and weight loss  
24 18 [26]. Examples of key intervention components are autonomy in relation to decision-making and behavioral  
25 19 interventions comprising goal setting and feedback via physical assessments [26 27].  
26  
27  
28  
29  
30

31 20 Although the separate or combined effects of PA, diet and behavioral interventions have been investigated  
32 21 previously in people with SCI with generally positive results, this study will investigate the effect of  
33 22 educational and behavioral interventions related to PA and diet in a subacute clinical rehabilitation setting.  
34 23 The study will investigate implementation of recommendations from the recent clinical practice guideline  
35 24 for identification and management of cardiometabolic risk after SCI, including assessments of physical  
36 25 capacity, body composition, bodyweight, dyslipidemia and impaired fasting glucose, as well as PA and diet  
37 26 [2]. Feedback on these assessments and goal setting will be part of the patient education delivered by  
38 27 clinical staff across settings during primary rehabilitation.  
39  
40  
41

42 28 To the best of our knowledge, only a single study has investigated outcomes related to cardiovascular risk  
43 29 factors following PA and behavioral interventions during subacute inpatient rehabilitation using outcomes  
44 30 related to cardiovascular risk factors, but this study only included wheelchair users [28 29]. The current  
45 31 study will contribute to existing knowledge by consecutively enrolling all patients, aged 18 years or older,  
46 32 with a new SCI who are admitted to CSCI, regardless of mobility status, and by evaluating the  
47 33 implementation of evidence-based guidelines for identification and management of cardiometabolic risk  
48 34 after SCI in a clinical setting.  
49  
50  
51

### 52 35 **Objectives**

53  
54 36 This study will investigate the effect of a systematic approach to incorporating targeted patient education  
55 37 about cardiovascular risk factors, PA and a healthy diet early in the primary rehabilitation process,  
56 38 compared to a historical control group.  
57  
58

### 59 39 **STUDY DESIGN**

1  
2  
3  
4 1 The primary study comprises a primary study designed as a controlled pre-post pragmatic intervention  
5 2 study with 6 months of follow up. A prospective national cohort study provides a historical control (Fig 1).

### 6 3 **Substudies**

7  
8  
9  
10 4 BMI is considered a high-risk determinant due to the impact of overweight on the cardiovascular risk profile  
11 5 and level of functioning among wheelchair-dependent people with SCI [5], [6] [7 8]. A prospective  
12 6 representative longitudinal survey of BMI conducted before the controlled intervention in collaboration  
13 7 with SCI Center of Western Denmark serves as a historical control (substudy 1). Additional outcome  
14 8 measures will be collected at CSCI during the survey period, including measures of PA, physical capacity and  
15 9 body composition. Two substudies of test-retest reliability of a VO<sub>2</sub>peak test (substudy 2) and a  
16 10 multisensor accelerometer (substudy 3) will be performed. VO<sub>2</sub>peak and accelerometry are considered  
17 11 valid methods to measure the effect, amount and intensity of PA at discharge from primary SCI  
18 12 rehabilitation. Both will be collected repeatedly during the primary study and serve as individual  
19 13 motivational components in education and communication, as well as outcome measures. Assessing test-  
20 14 retest reliability of the two procedures is essential.

### 21 15 **METHODS AND ANALYSIS**

22 16 The SPIRIT reporting guidelines are used in the reporting of the clinical trial [30].

#### 23 17 **Patient involvement**

24 18 A user panel consisting of six patients (three women and three men aged 23 to 78 years), including both  
25 19 recently injured people and those who had been living with SCI for some time, was established and  
26 20 involved in the early phase of study protocol development. All participants were hospitalized at CSCI when  
27 21 they participated in semi-structured focus group interviews about their perceptions of health promotion  
28 22 practices in the clinical setting [31]. The interview focused on both the existing level of information about  
29 23 increased risk of overweight and cardiovascular disease after SCI and education about diet and PA as a way  
30 24 of reducing those risks. Data were analyzed using constant comparative analysis [32]. The user panel  
31 25 recommended more information in the early phase of rehabilitation about cardiovascular risk, PA and diet  
32 26 and more support and guidance about appropriate diet and being physically active, which is the primary  
33 27 aim of the project. The study results will be disseminated to project participants.

#### 34 28 **Participants and eligibility criteria**

35 29 Inpatients who are aged 18 years or older, injured with SCI within the last 12 months and admitted at CSCI  
36 30 are recruited and consecutively included after providing informed consent, regardless of SCI etiology (i.e.,  
37 31 traumatic or non-traumatic), neurological level or completeness<sup>1</sup> of the lesion. In substudy 1, all newly

---

51  
52  
53 <sup>1</sup> The completeness of the injury is graded according to the ASIA Impairment Scale (AIS). AIS is used to  
54 determine the degree of motor and sensory function below the level of the SCI. A complete or incomplete  
55 injury is defined as absence or presence of sensory and motor function in the most caudal sacral segments.  
56 A = sensory and motor complete; B = sensory incomplete without motor function > 3 levels below the  
57 motor level of injury on both sides of the body; C = motor incomplete, with preserved motor function  
58 below the level of injury and where > 50% of the key muscles below the injury level have a degree < 3 by  
59  
60



1  
2  
3  
4  
5  
6  
7  
8  
9  
10  
11  
12  
13  
14  
15  
16  
17  
18  
19  
20  
21  
22  
23  
24  
25  
26  
27  
28  
29  
30  
31  
32  
33  
34  
35  
36  
37  
38  
39  
40  
41  
42  
43  
44  
45  
46  
47  
48  
49  
50  
51  
52  
53  
54  
55  
56  
57  
58  
59  
60

1 injured people with SCI admitted at the SCI Centre of Western Denmark are also included. Substudy 1  
2 serves as a historical control group, and the intervention in the primary study is part of a new standard of  
3 care. Therefore, randomization, blinding and sample size calculation are not appropriate.

4 Exclusion criteria for the VO<sub>2</sub>peak test include motor complete SCI (AIS A and B) at cervical (C)4 level or  
5 above and a need for artificial ventilation. Other exclusion criteria are the presence of decubiti, severe  
6 spasticity or musculoskeletal problems at risk of exacerbation or aggravation during testing or preventing  
7 completion of the test.

8 Substudy 3 includes a convenience sample of 20 patients with the goal of ensuring variation in age, gender,  
9 neurological level and completeness of SCI.

10 Primary study: A systematic interdisciplinary multimodal intervention that facilitates physical activity,  
11 healthy diet and maintenance after discharge through strategic patient education as part of usual care,  
12 with the aim of decreasing cardiovascular risk

13 This pre-post study includes all patients aged 18 years or older with a new SCI who are admitted at CSCI  
14 during a period of 12 to 18 months. The study includes follow up 6 months after discharge from primary  
15 rehabilitation.

16 Approximately 70 patients with a new SCI are admitted to CSCI annually; but due to expected missing data ,  
17 complete data sets from admission through follow up may be fewer.

## 18 **Intervention**

19 The intervention is based on recommendations in a recently released clinical practice guideline for the  
20 identification and management of cardiometabolic risk after SCI and conclusions from a meta- synthesis by  
21 Williams et al. and a systematic review by Greaves et al. [26 27]. A combination of several interventions is  
22 most effective at promoting a physically active lifestyle and weight loss after SCI. Crucial intervention  
23 components are autonomy in relation to decision-making about PA, support and follow up from health care  
24 professionals and mentors with SCI, information about adapted PA and behavioral interventions comprising  
25 goal setting and feedback from, for example, physical tests. Greaves et al. recommend group sessions,  
26 individual sessions and interdisciplinary interventions in the clinical setting that focus on maintaining PA  
27 and healthy diet [26].

28 The intervention will be integrated into usual care during the project period, and all newly injured patients  
29 will receive all multimodal components as appropriate to individual circumstances, such as level of injury.  
30 At discharge, the patient will describe adherence to the intervention and document participation in  
31 targeted education elements on a checklist. Similarly, health care professionals will use a checklist to  
32 document adherence to interventions at the start, midpoint and end of the study period. Medical records  
33 and schedules for goal-setting meetings will also be reviewed to monitor health care professionals'

---

manual muscle test (MMT); D = motor incomplete with preserved motor function below the level of injury  
and where > 50% of key muscles below the injury level have a degree > 3 by MMT; E = normal sensory and  
motor function in all segments.

1  
2  
3  
4 1 adherence to the interventions. Rehabilitation of the physical level of functioning and physical capacity  
5 2 (e.g., physiotherapy) will occur as part of usual care and is a mandatory core component of highly  
6 3 specialized SCI rehabilitation. However, decisions about PA made by the patient during rehabilitation may  
7 4 be integrated into the rehabilitation program to achieve his or her goals for PA during and after the  
8 5 rehabilitation period.

11 6 A central part of the intervention is to create a standardized approach to targeted strategic patient  
12 7 education of patients about cardiovascular risk factors, PA and a healthy diet by systematizing the existing  
13 8 clinical setting and treatment interventions.

16 9 In the process of reorganizing the institutional approach to addressing cardiovascular risks, *pre-education*  
17 10 of interdisciplinary health care personnel and peers with SCI is mandatory to clarify their roles in relation to  
18 11 targeted patient education. Pocket cards with evidence-based recommendations related to PA, diet and  
19 12 BMI in people with SCI are provided to all health care professionals and peers with SCI and will also  
20 13 illustrate the timeline for systematic targeted approaches during primary rehabilitation (Fig. 2)

23 14 Patients receive information and instructions about PA and healthy diet through patient education based  
24 15 on principles that include individualized face-to-face interaction between patients and health care  
25 16 professionals while working towards a specific health-related outcome [33]. The interventions begin at the  
26 17 outset of primary SCI rehabilitation and are integrated into usual care at predetermined time points (e.g.,  
27 18 dual- energy X-ray absorptiometry (DXA) scan, VO<sub>2</sub>peak, metabolic profile with feedback early after  
28 19 admission to rehabilitation and goal setting meetings about PA and diet within 6 weeks after admission)  
29 20 throughout the entire rehabilitation continuum, with the goal of secondary and tertiary cardiovascular  
30 21 prevention.

34 22 Representatives of all the health care professions generally carry out education of patients and their  
35 23 relatives in a variety of educational settings [34 35], with a focus on clarifying the importance of PA and a  
36 24 healthy diet. Patient education involves training sessions [36] and feedback on physiological outcome  
37 25 measures and tests that also serve as motivational tools. Additionally, goal-setting meetings, tools for  
38 26 shared decision making [37] [26] [38] and use of mentors with SCI are also integrated as components  
39 27 supporting decision making about PA and healthy diet. BMI and diet are evaluated 3 months after discharge  
40 28 in an outpatient setting (see appendix for a more detailed description of the strategic interventions).

44 29 All components are offered to patients as a mandatory part of the intervention, ensuring that information  
45 30 and patient education are provided and decisions about PA and healthy diet are made. However, patients  
46 31 individually determine the extent to which they engage in making decisions and setting goals about PA and  
47 32 healthy diet. Interdisciplinary health care professionals respect the decisions and autonomy of patients  
48 33 who choose not to set goals or make decisions about PA and healthy diet.

51 34 Several outcome measures used to evaluate the intervention at admission, discharge and at follow up 6  
52 35 months after discharge are also motivational components of the intervention: BMI, body composition  
53 36 measured by DXA, physical capacity (VO<sub>2</sub>peak), PA (Actiheart multisensor accelerometer) and blood  
54 37 samples describing metabolic profile.

57 38 Substudy 1. Prospective national survey of body mass index among people with SCI  
58  
59  
60



1  
2  
3  
4  
5  
6  
7  
8  
9  
10  
11  
12  
13  
14  
15  
16  
17  
18  
19  
20  
21  
22  
23  
24  
25  
26  
27  
28  
29  
30  
31  
32  
33  
34  
35  
36  
37  
38  
39  
40  
41  
42  
43  
44  
45  
46  
47  
48  
49  
50  
51  
52  
53  
54  
55  
56  
57  
58  
59  
60

This study includes all patients with a new SCI hospitalized at CSCI or SCI Center of Western Denmark during a period of 10 months; 100 patients are expected to participate. Data on BMI, level of functioning (Spinal Cord Injury Independence Measure III [SCIM III]) and neurological status (International Standards for Neurological Classification of SCI [ISNCSCI]) are collected at both centers. Patients with an SCI within the last 12 months who are admitted for rehabilitation several months after injury are also included in the prospective survey. Data on BMI at the time of injury are collected for all patients at admission to primary rehabilitation from the patient's medical record. At CSCI, BMI every 6 weeks, quality of life (QoL SCI), depression (PHQ-2), amount of PA (Leisure Time Physical Activity Questionnaire for people with Spinal Cord Injury [LTPAQ-SCI]) and self-assessed ability to be physically active (Exercise Self Efficacy Scale [ESES]) will be collected at admission, discharge and follow up 6 months after discharge. Measures of physical capacity (VO<sub>2</sub>peak) and body composition (DXA) are also obtained at discharge. Data from this substudy serve as a historical control for the Intervention study.

### Substudy 2. Test-retest reliability of VO<sub>2</sub>peak testing

This study includes all patients participating in substudy 1 who are able to perform the VO<sub>2</sub>peak test at discharge from primary rehabilitation. Patients are randomized to a test session of either intra- or interrater reliability. Due to the complexity of SCI, four pre-defined exercise protocols are used to reach criteria for VO<sub>2</sub>peak, defined as a respiratory exchange ratio (RER) > 1.0 [39]. As a starting point, people with an incomplete SCI, as defined by ISNCSCI, will use a seated cross-trainer (NuStep T5XR®), which has software incorporating both a standard and a modified test protocol. The standard protocol starts at 50 watts (W) with 25W incremental increases every 2 minutes in the first three stages, 30 W increments thereafter and 115 steps per minute (SPM). The modified protocol starts at 25W with 15W increments every 2 minutes and 80 SPM. The equipment and modified protocol are reliable in people with traumatic brain injury and has been validated in healthy persons [40 41]. In people with an incomplete SCI, the equipment is safe and involves a large amount of muscle mass [42]. People with an ISNCSCI-defined complete SCI, very de-conditioned patients or those with an incomplete SCI but a poor ISNCSCI lower extremity motor score that may hinder reaching VO<sub>2</sub>peak on the seated cross trainer will use an arm-cranking ergometer (SCI FIT Pro1®). Test protocols used on the SCI FIT ergometer are established from the most common protocols for people with tetra- and paraplegia during rehabilitation reported in a recent systematic review [39]. The study protocols are designed as stage protocols starting at 5 W with an increase every minute of 5W for people with tetraplegia and 10W for people with paraplegia and 60 revolutions per minute.

If predefined criteria for VO<sub>2</sub>peak are not reached during test 1, a more suitable protocol to reach VO<sub>2</sub>peak is chosen for test 2 and will be retested at test 3. However, this is not possible if the protocol designed for people with tetraplegia is used. The test-retest study takes place at discharge, with 48 hours to 5 days between tests occurring at the same time of the day. Participants refrain from caffeine, alcohol and intensive physical exercise on the day of testing, as well as tobacco smoking two hours before testing. Bladder emptying occurs immediately before testing.

In the intervention study, the four exercise protocols are used to ensure that a true VO<sub>2</sub>peak is reached during the rehabilitation process. VO<sub>2</sub>peak is highly dependent on the level and completeness of the SCI and the testing equipment; for instance, a patient may be initially tested on the protocol designed for

1  
2  
3  
4 1 people with a complete tetraplegia and later tested on the non-modified standard protocol in the seated  
5 2 cross trainer due to neurological recovery and improvement in functional level.

### 6 3 Substudy 3. Test-retest reliability of a multisensor accelerometer

7  
8 4 This study includes a convenience sample of 20 patients ensuring a representative sample of individuals  
9 5 with para- and tetraplegia, complete and incomplete SCI, age and gender. The equipment used for  
10 6 monitoring the amount and intensity of PA consists of sensors registering acceleration and heart rate and is  
11 7 placed on the thorax of the participant with two surface electrodes. Data are expressed as daily PA energy  
12 8 expenditure (kcal/min) and the time spent in different activity intensities on the basis of metabolic  
13 9 equivalents. The equipment has been previously used among wheelchair-dependent people with SCI,  
14 10 although its reliability in an inpatient setting has not been assessed [43]. Precision is higher when the  
15 11 equipment is calibrated to individual participants using measures of energy expenditure and corresponding  
16 12 heart rate during rest and during exercise testing, covering a range of submaximal and maximal intensities.  
17 13 The equipment software uses these data to estimate energy expenditure using branched model equations  
18 14 [44]. This method will also take into account compromised cardiac sympathetic innervation in individuals  
19 15 with an injury above T6. In this study, individual calibration is based on activity performed during the  
20 16 VO<sub>2</sub>peak test (substudy 2), with resting metabolic rate measured before testing for 10 minutes following a  
21 17 rest period of 20 minutes [45 46]. Continuous measurements of the amount and intensity of PA will occur  
22 18 over 48 hours with sampling epochs every 15 seconds and a minimum wear-time of 80% [47]. To ensure  
23 19 comparability, test-retest procedures are performed over a period of two weeks on identical days of the  
24 20 week .

### 21 21 **Outcome measures**

22 22 Outcome measures evaluating the intervention comprise the following.

#### 23 23 Primary outcome

24 24 *Oxygen uptake* is measured as VO<sub>2</sub>peak during a maximal exercise test and is the gold standard for  
25 25 measuring aerobic capacity. For people with SCI, several test protocols have been used [36].

#### 26 26 Secondary outcomes

27 27 *Objective PA* is measured in a subsample of the historical control cohort and participants in the  
28 28 intervention study with a multisensor device (Actiheart®) recording accelerations and heart rate. It  
29 29 has been previously used for wheelchair users with SCI, and individual calibration is important to  
30 30 get the most accurate data [47]. Evidence-based exercise guidelines for cardiometabolic health in  
31 31 people with SCI recommend a minimum of 30 minutes of moderate to vigorous aerobic exercise  
32 32 three times weekly [21].

33 33  
34 34 *Bodyweight* is measured as BMI, which is the most widely used outcome measure for body weight in  
35 35 people with SCI. BMI is not sensitive enough to distinguish between fat mass and lean body mass or  
36 36 overweight in people with SCI. Overweight among adults with SCI is defined as  $\geq 22\text{kg/m}^2$  [48] [2]. BMI is

1  
2  
3  
4  
5  
6  
7  
8  
9  
10  
11  
12  
13  
14  
15  
16  
17  
18  
19  
20  
21  
22  
23  
24  
25  
26  
27  
28  
29  
30  
31  
32  
33  
34  
35  
36  
37  
38  
39  
40  
41  
42  
43  
44  
45  
46  
47  
48  
49  
50  
51  
52  
53  
54  
55  
56  
57  
58  
59  
60

1 already collected as part of usual care, and data for BMI every 6 weeks until discharge will be included in  
2 the project.

3 *Body composition* is determined by DXA, which is the gold standard for assessing obesity and body  
4 composition. Among adults with SCI, men with >22% body fat and women with >35% body fat should be  
5 classified as obese [2].

6 *Metabolic profile* consists of C-reactive protein (CRP) as a marker for inflammation and lipid profile  
7 including total cholesterol, triglycerides, high-density lipoprotein cholesterol (HDL-C) and low-density  
8 lipoprotein cholesterol (LDL-C), which are included in the international SCI Endocrine and Metabolic  
9 Function Basic Data Set. Triglycerides should not be  $\geq 150$  mg/dL (1.7 mmol/L). HDL-C should not be  $< 40$   
10 mg/dL (1.03 mmol/L) in men or  $< 50$  mg/dL (1.29 mmol/L) in women [2]. LDL-C should not be  $> 3.0$  mmol/l  
11 [49]. Hemoglobin A1c (HbA1c) serves as a marker for carbohydrate metabolism and is included in the  
12 International SCI Endocrine and Metabolic Extended Data Set [50 51]. Criteria for a diagnosis of prediabetes  
13 include HbA1c 5.7-6.4% (39-47 mmol/mol) and criteria for a diagnosis of diabetes include HbA1c  $> 6.5\%$  ( $>$   
14 48 mmol/mol) [2]. As approved by the Committees on Health Research Ethics in the Capital Region of  
15 Denmark, blood samples will not be stored after analysis.

16 *Blood pressure (BP)* is measured by sphygmomanometry. Criteria for a diagnosis of hypertension in people  
17 with SCI vary with injury level, severity and etiology. BP should not exceed 130/85 mm Hg.

18  
19 *Level of functioning* is determined by the SCIM III, which is a valid and reliable outcome measure designed  
20 to assess level of functioning in people with SCI in clinical care and research [52] [53 54] [55].

21 *Neurologic* status is determined by the ISNCSCI and is the most widely used classification in people with SCI  
22 [56 57].

23 *Depression* is measured by the Patient Health Questionnaire-2 (PHQ-2), which is a generic measure of  
24 depression. Among people with SCI, a cut-off score of 3 is associated with sensitivity of 83.3% and  
25 specificity of 95.7% [58].

26 *Quality of life* is measured by the International SCI Quality of Life Basic Data Set (QoL SCI), which consists of  
27 three questions about satisfaction with life in general and physical and mental health. It is a valid outcome  
28 measure with good internal consistency [59] [60].

29 *Self-reported PA* is measured by the LTPAQ-SCI, which is a self-administered questionnaire about leisure  
30 time PA, including amount and intensity during the past 7 days. Reliability and validity of self-reported  
31 activity are satisfactory in moderate and high intensity levels [61]. An additional question concerning PA  
32 outside of leisure time PA (i.e., PA as part of rehabilitation) is included in substudy 1. The question is  
33 designed to be similar to the original questions and is scored using the same intensity scale. During the  
34 intervention study, a version of LTPAQ-SCI adjusted to a Danish context will be used. This version is  
35 approved by the developers of the original LTPAQ-SCI and includes active transportation and active  
36 physiotherapy.

37 *Self-assessed ability to be physically active* is measured by ESES. It is an outcome measure developed for  
38 assessing self-efficacy related to PA in people with SCI and consists of 10 questions on a 0-4 response scale.

1  
2  
3  
4 1 ESES is reliable with high internal consistency (Cronbach's alpha 0.94) and satisfactory content validity in  
5 2 the form of face and construct validity [62].

7 3 *Shared decision making related to patient decision aids for PA and healthy diet* is measured by the 9-item  
8 4 Shared Decision Making Questionnaire (SDM-Q-9), which assesses the process of shared decision making  
9 5 between health care professionals and the patient from the patient's perspective. SDM-Q-9 consists of nine  
10 6 statements, which can be rated on a six-point scale from 0 to 5, with higher scores indicating greater  
11 7 shared decision making. All items are summed to yield a raw total score of 0 to 45. SDM Q-9 is only used  
12 8 at discharge.

13 9 *Varied and healthy diet in an appropriate amount* is measured by the Nordic monitoring of diet, PA and  
14 10 overweight (NORMON) developed in a Nordic collaboration and commonly used for monitoring [63]. The  
15 11 questionnaire explores how frequently 16 food indicators, several of which are recommended in the Nordic  
16 12 national nutritional recommendations, have been consumed over the previous 12 months. NORMON also  
17 13 includes questions related to alcohol intake, smoking and PA. The questionnaire was validated in 2009  
18 14 against existing questionnaires about diet [64]. In this study, a modified version of the questionnaire will  
19 15 ask patients to recall their dietary habits over the previous month.

## 26 16 **Statistics**

27  
28 17 All continuous data collected at admission, discharge and follow up are reported descriptively. In the  
29 18 intervention study, differences in the primary and secondary outcomes between baseline and follow up will  
30 19 be analyzed using analysis of covariance. The same approach will be used between baseline and follow up  
31 20 in the historic control study. Likewise differences between the intervention study and the historic control is  
32 21 analyzed using analysis of covariance. Due to the small sample size, participants in the intervention study  
33 22 and historic control will not be matched but participants will be compared to each other controlling for  
34 23 ISNCSCI classification, gender and functional level. Linear regression is used to measure the strength and  
35 24 association between BMI and DXA results and the association between the psychometric variables e.g. QoL  
36 25 and depression compared to VO<sub>2</sub>peak and BMI. Ordinal regression analysis is made for ordinal data e.g.  
37 26 ESES. Missing data on primary and secondary data are analyzed as intention to treat without imputation,  
38 27 but dropout analysis is made with baseline characteristics for participants completing and not completing  
39 28 the study. In sub-studies 3 and 4, the reliability of the outcome measures are analyzed by paired t-test,  
40 29 Pearson's product-moment correlation and coefficient of variation or intraclass correlation coefficient  
41 30 between the test-retest sessions.

## 47 31 **Ethics and dissemination**

48  
49 32 During the intervention period, all newly injured patients who are admitted for rehabilitation at CSCI are  
50 33 offered treatment and tests included in the intervention as a mandatory part of usual care to the extent  
51 34 they are able to participate, which may vary with the level of lesion and completeness of SCI. Because the  
52 35 intervention is part of usual care and comprises a standardized approach to patient education, no data  
53 36 monitoring or interim analysis is planned. Informed consent is obtained to analyze the data generated  
54 37 during the project. The intervention in the project is closely related with the content of the present  
55 38 rehabilitation, and the risk of pain and discomfort is considered modest. During the VO<sub>2</sub>peak test, special  
56 39 attention is paid to potential symptoms of autonomic dysreflexia (AD) in people with SCI above T5-6. In  
57  
58  
59  
60

1  
2  
3  
4  
5  
6  
7  
8  
9  
10  
11  
12  
13  
14  
15  
16  
17  
18  
19  
20  
21  
22  
23  
24  
25  
26  
27  
28  
29  
30  
31  
32  
33  
34  
35  
36  
37  
38  
39  
40  
41  
42  
43  
44  
45  
46  
47  
48  
49  
50  
51  
52  
53  
54  
55  
56  
57  
58  
59  
60

1 case of AD, the exercise test is stopped and relevant actions are initiated. It is assumed that any risks are  
2 surpassed by therapeutic gains, i.e, expected reductions in the risk of cardiovascular disease and mortality.  
3 Any unintended events related to the intervention are reported according to existing regional procedures,  
4 and compensation is covered by the normal procedures for unintended harm during hospitalization. The  
5 study is reported to the Committees on Health Research Ethics in the Capital Region of Denmark and the  
6 Danish Data Protection Agency and is registered at Clinicaltrials.gov.

#### 7 **Data statement section**

8 All patient data are stored in a secure web-based database (Redcap) with limited access and ID code to  
9 identify patients, to which data are transferred directly or by an encrypted USB stick. Patients are assigned  
10 unique identification numbers, which is the only identifier exported from Redcap during data analysis. Data  
11 are stored until December 31, 2027, after which paper material is shredded, data files are deleted and the  
12 Redcap database is no longer accessible. The principal investigator has access to all trial data. Data can be  
13 accessed upon request to the corresponding author after reports related to the Ph.D. project are published.  
14 No data monitoring committee is established.

#### 15 **DISCUSSION**

16 This study will investigate the effectiveness of a systematic institutional strategy incorporating  
17 individualized patient education and testing about cardiovascular risk factors, PA and a healthy diet lifestyle  
18 early after SCI diagnosis during primary rehabilitation, compared to a historical control group. Our findings  
19 will be discussed in light of recent studies suggesting that an interdisciplinary multimodal approach in  
20 prevention of cardiovascular risks among people with SCI with a focus on diet, PA and behavioral  
21 interventions is beneficial [23] [65] [66] [13 25] [14]. Crucial components of the intervention are autonomy  
22 in relation to decision-making and support and follow up from health care professionals and mentors with  
23 SCI. A qualitative meta-synthesis concluded that timely information about PA and its benefits in relation to  
24 SCI and behavioral interventions using goal setting and motivational feedback through physical tests might  
25 be important patient-activating tools [27]. This is consistent with a recent systematic review by Greaves et  
26 al. [26], who also strongly recommended that interventions in the clinical setting contain both group  
27 sessions and individual sessions as well as interdisciplinary interventions that focus on maintaining PA and  
28 healthy diet [26]. These elements are incorporated into the intervention investigated in this study.

29 Several of the outcome measures used to evaluate the intervention are components of the intervention, as  
30 recommended in the clinical guideline for identification and management of cardiometabolic risk after SCI  
31 [2]. Outcome measures also serve as individual motivational tools. The primary outcome measure is  
32 VO<sub>2</sub>peak, for which a significant positive relationship exists with some cardiometabolic markers in people  
33 with SCI, such as lipid profiles and fasting insulin levels [61]. Consequently, PA that increases physical  
34 capacity may also reduce the risk of cardiovascular disease [67]. Physical capacity measured as VO<sub>2</sub>peak is  
35 positively associated with functional independence [68], less physical strain during activities of daily living  
36 [69] and life satisfaction [70] among people with SCI, although other measures of physical capacity have an  
37 important and, in some cases, stronger impact on functional independence [68].

38 Among people with SCI, several test protocols have been used for assessing VO<sub>2</sub>peak [36]. In this study,  
39 four exercise protocols make VO<sub>2</sub>peak testing feasible for clinical physiotherapists who, although trained in



1  
2  
3  
4 1 using the testing equipment, are inexperienced in determining the appropriate workload during VO<sub>2</sub>peak  
5 2 testing, which is difficult due to the complexity of a SCI. If predefined criteria for VO<sub>2</sub>peak are not reached,  
6 3 a more suitable protocol is selected. The protocol and equipment used in the study are identical at  
7 4 admission and discharge. If a patient's neurological and functional level has improved to the point where a  
8 5 different protocol and equipment will more accurately measure VO<sub>2</sub>peak, an additional test at discharge  
9 6 will be performed on a separate day. Data from both tests will be evaluated and the new protocol will be  
10 7 repeated at follow up 6 months after discharge. This approach to testing VO<sub>2</sub>peak in a clinical setting has,  
11 8 to the best of our knowledge, not been described previously

12 9 Secondary outcome measures include PA. Objective PA will be measured by the Actiheart accelerometer,  
13 10 which has previously been used for wheelchair users with SCI in laboratory and outpatient settings [47]. In  
14 11 this study, it will be used in an inpatient setting and among people with SCI and some ambulatory function,  
15 12 which has not been previously described. As a measure of self-reported PA, a validated Danish version of  
16 13 the LTPAQ-SCI will be used. This version has been adapted to a Danish context in close collaboration with  
17 14 the developers of the original questionnaire; PA-related active transportation, such as hand biking or  
18 15 wheeling to work or school, as well as active physiotherapy exercises are included, as both are common PA  
19 16 for people with SCI in Denmark.

20 17 The primary study is possible due to the average length of stay during initial rehabilitation at CSCI, which is  
21 18 85 and 86 days, respectively, for people with incomplete tetra- and paraplegia and 110 and 123 days,  
22 19 respectively, for people with complete tetra- and paraplegia (unpublished data, 2014). The study is highly  
23 20 dependent on adherence by interdisciplinary health care professionals and patients to the new  
24 21 intervention. Health care professionals' adherence to the intervention is both supported and measured by  
25 22 a process inspired by a prospective effect and process evaluation for complex trials, in which at least 75%  
26 23 must agree that a specific element of strategic patient education has become a part of routine clinical  
27 24 practice before it is considered implemented [71]. This evaluation is repeated every 6-8 weeks throughout  
28 25 the intervention period. Similarly, perceived barriers to implementation are also evaluated every 6-8 weeks  
29 26 throughout the intervention period. Interdisciplinary coordination meetings occurring three times weekly  
30 27 facilitate the implementation of all interventions.

31 28 Patient adherence may be challenging; in one report, patients missed an average of 2.5 hours weekly of  
32 29 rehabilitation [72]. Patient adherence to the intervention is described at discharge by the patient, who will  
33 30 document participation in targeted education elements using a checklist. However, a 2016 study found that  
34 31 the most important factor facilitating participation in clinical studies was the possibility of learning more  
35 32 about SCI and health, which is a clear potential in the intervention study [73]. A review by Van Wyk et al.  
36 33 emphasizes that patient education is an important part of the interdisciplinary rehabilitation of people with  
37 34 SCI and recommend an individualized approach and the use of different settings in which the patient can  
38 35 receive the education [29].

### 36 **Author Contributions**

37 37 Nicolaj Jersild Holm has been primarily responsible for writing the protocol. Tom Møller (head supervisor),  
38 38 Fin Biering-Sørensen and Lone Schou (co-supervisors) have all contributed to the development of the  
39 39 protocol and study design, as well as feedback, supervision and contributions to the text writing. Lis  
40 40 Adamsen has read and commented on several of the protocol drafts and contributed ideas for ensuring

1  
2  
3  
4  
5  
6  
7  
8  
9  
10  
11  
12  
13  
14  
15  
16  
17  
18  
19  
20  
21  
22  
23  
24  
25  
26  
27  
28  
29  
30  
31  
32  
33  
34  
35  
36  
37  
38  
39  
40  
41  
42  
43  
44  
45  
46  
47  
48  
49  
50  
51  
52  
53  
54  
55  
56  
57  
58  
59  
60

adherence of participants during the intervention. Line Dalsgaard has, in particular, contributed critical insights into the clinical setting and workflows involved in the project and the initial development and writing of the protocol. All authors approved the final version of the manuscript.

#### Funding statement

This work was supported by a research program, "Centre for Integrated Rehabilitation of Cancer Patients (CIRE) - Neuro/Psychology", conducted collaboratively by the University Hospitals Centre for Health Care Research, University Hospital Copenhagen, Rigshospitalet, University College Copenhagen, Department of Nursing and Nutrition, and the NeuroScience Centre, Rigshospitalet.

This research received no grants from funding agencies in the public, commercial, or not-for-profit sectors

#### Competing interest statement

The authors have no conflicts of interest.

#### REFERENCES

1. Biering-Sorensen F. Rygmarvsskade-den moderne behandling. *Ugeskrift for Læger* 2001;**163**:2766-69.
2. Nash MS, Groah SL, Gater DR, Jr., et al. Identification and management of cardiometabolic risk after spinal cord injury: clinical practice guideline for health care providers. *Top Spinal Cord Inj Rehabil* 2018;**24**:379-423. doi: 10.1310/sci2404-379
3. Møller T, Moser C, Adamsen L, et al. Early warning and prevention of pneumonia in acute leukemia by patient education, spirometry, and positive expiratory pressure: a randomized controlled trial. *Am J Hematol* 2016;**91**:271-6.
4. Moller T, Borregaard N, Tvede M, et al. Patient education: a strategy for prevention of infections caused by permanent central venous catheters in patients with haematological malignancies: a randomized clinical trial. *J Hosp Infect* 2005;**61**:330-41.
5. Rajan S, McNeely MJ, Warms C, et al. Clinical assessment and management of obesity in individuals with spinal cord injury: a review. *J Spinal Cord Med* 2008;**31**:361-72.
6. Wahman K, Nash MS, Lewis JE, et al. Cardiovascular disease risk and the need for prevention after paraplegia determined by conventional multifactorial risk models: the Stockholm spinal cord injury study. *J Rehabil Med* 2011;**43**:237-42. doi: 10.2340/16501977-0658
7. Libin A, Tinsley EA, Nash MS, et al. Cardiometabolic risk clustering in spinal cord injury: results of exploratory factor analysis. *Top Spinal Cord Inj Rehabil* 2013;**19**:183-94. doi: 10.1310/sci1903-183
8. Nash MS, Tractenberg RE, Mendez AJ, et al. Cardiometabolic syndrome in people with spinal cord injury/disease: guideline-derived and nonguideline risk components in a pooled sample. *Arch Phys Med Rehabil* 2016;**97**:1696-705. doi: 10.1016/j.apmr.2016.07.002
9. Felleiter P, Krebs J, Haeberli Y, et al. Post-traumatic changes in energy expenditure and body composition in patients with acute spinal cord injury. *J Rehabil Med* 2017;**49**:579-84. doi: 10.2340/16501977-2244
10. de Groot S, Post MW, Postma K, et al. Prospective analysis of body mass index during and up to 5 years after discharge from inpatient spinal cord injury rehabilitation. *J Rehabil Med* 2010;**42**:922-8.

11. Stenson KW, Deutsch A, Heinemann AW, et al. Obesity and inpatient rehabilitation outcomes for patients with a traumatic spinal cord injury. *Arch Phys Med Rehabil* 2011;**92**:384-90. doi: 10.1016/j.apmr.2010.07.235
12. Salem R, Bamer AM, Alschuler KN, et al. Obesity and symptoms and quality of life indicators of individuals with disabilities. *Disabil Health J* 2014;**7**:124-30. doi: 10.1016/j.dhjo.2013.10.003
13. Chen Y, Henson S, Jackson AB, et al. Obesity intervention in persons with spinal cord injury. *Spinal Cord* 2006;**44**:82-91. doi: 10.1038/sj.sc.3101818
14. Nash MS, Kressler J. Model programs to address obesity and cardiometabolic disease: interventions for suboptimal nutrition and sedentary lifestyles. *Arch Phys Med Rehabil* 2016;**97**:S238-46. doi: 10.1016/j.apmr.2016.05.026
15. Szlachcic Y, Adkins RH, Adal T, et al. The effect of dietary intervention on lipid profiles in individuals with spinal cord injury. *J Spinal Cord Med* 2001;**24**:26-9. doi: 10.1080/10790268.2001.11753551
16. Wong S, van Middendorp J, Belci M, et al. Knowledge, attitudes and practices of medical staff towards obesity management in patients with spinal cord injuries: an International survey of four western European countries. *Spinal Cord* 2015;**53**:24-31. doi: 10.1038/sc.2014.168
17. Locatelli SM, Gerber BS, Goldstein B, et al. Health care provider practices, barriers, and facilitators for weight management for individuals with spinal cord injuries and disorders. *Top Spinal Cord Inj Rehabil* 2014;**20**:329-37. doi: 10.1310/sci2004-329
18. Fysisk aktivitet-håndbog om forebyggelse og behandling. Copenhagen: Sundhedsstyrelsen 2011.
19. Hicks AL, Martin Ginis KA, Pelletier CA, et al. The effects of exercise training on physical capacity, strength, body composition and functional performance among adults with spinal cord injury: a systematic review. *Spinal Cord* 2011;**49**:1103-27. doi: 10.1038/sc.2011.62
20. van der Scheer JW, Martin Ginis KA, Ditor DS, et al. Effects of exercise on fitness and health of adults with spinal cord injury: a systematic review. *Neurology* 2017;**89**:736-45. doi: 10.1212/wnl.0000000000004224
21. Martin Ginis KA, van der Scheer JW, Latimer-Cheung AE, et al. Evidence-based scientific exercise guidelines for adults with spinal cord injury: an update and a new guideline. *Spinal Cord* 2017 doi: 10.1038/s41393-017-0017-3
22. Rezende LS, Lima MB, Salvador EP. Interventions for promoting physical activity among individuals with spinal cord injury: a systematic review. *J Phys Act Health* 2018;**15**:1-6. doi: 10.1123/jpah.2018-0034
23. Nash MS, Cowan RE, Kressler J. Evidence-based and heuristic approaches for customization of care in cardiometabolic syndrome after spinal cord injury. *J Spinal Cord Med* 2012;**35**:278-92. doi: 10.1179/2045772312y.00000000034
24. Ginis KA, Arbour-Nicitopoulos KP, Latimer AE, et al. Leisure time physical activity in a population-based sample of people with spinal cord injury part II: activity types, intensities, and durations. *Arch Phys Med Rehabil* 2010;**91**:729-33. doi: 10.1016/j.apmr.2009.12.028
25. Nooijen CF, Post MW, Spooren AL, et al. Exercise self-efficacy and the relation with physical behavior and physical capacity in wheelchair-dependent persons with subacute spinal cord injury. *J Neuroeng Rehabil* 2015;**12**:103. doi: 10.1186/s12984-015-0099-0
26. Greaves CJ, Sheppard KE, Abraham C, et al. Systematic review of reviews of intervention components associated with increased effectiveness in dietary and physical activity interventions. *BMC Public Health* 2011;**11**:119. doi: 10.1186/1471-2458-11-119
27. Williams TL, Ma JK, Martin Ginis KA. Participant experiences and perceptions of physical activity-enhancing interventions for people with physical impairments and mobility limitations: a meta-synthesis of qualitative research evidence. *Health Psychol Rev* 2017;**11**:179-96. doi: 10.1080/17437199.2017.1299027
28. Nooijen CF, Stam HJ, Bergen MP, et al. A behavioural intervention increases physical activity in people with subacute spinal cord injury: a randomised trial. *J Physiother* 2016;**62**:35-41. doi: 10.1016/j.jphys.2015.11.003



1  
2  
3  
4  
5  
6  
7  
8  
9  
10  
11  
12  
13  
14  
15  
16  
17  
18  
19  
20  
21  
22  
23  
24  
25  
26  
27  
28  
29  
30  
31  
32  
33  
34  
35  
36  
37  
38  
39  
40  
41  
42  
43  
44  
45  
46  
47  
48  
49  
50  
51  
52  
53  
54  
55  
56  
57  
58  
59  
60

29. Nooijen CF, Stam HJ, Sluis T, et al. A behavioral intervention promoting physical activity in people with subacute spinal cord injury: secondary effects on health, social participation and quality of life. *Clin Rehabil* 2017;**31**:772-80. doi: 10.1177/0269215516657581
30. Chan AW, Tetzlaff JM, Altman DG, et al. SPIRIT 2013 statement: defining standard protocol items for clinical trials. *Ann Intern Med* 2013;**158**:200-7. doi: 10.7326/0003-4819-158-3-201302050-00583
31. Krueger R, Casey M. Focus Groups: A Practical Guide for Applied Research. Newbury Park, California: SAGE Publications 2000.
32. Glaser B, Strauss A. The Discovery of Grounded Theory: Strategies for Qualitative Research. New York: Aldine 1980.
33. Møller T. Individualized supervised patient education: a key role in reinforcement of infection protection and outpatient management of acute leukemia (dissertation). University of Copenhagen, 2011.
34. van Wyk K, Backwell A, Townson A. A narrative literature review to direct spinal cord injury patient education programming. *Top Spinal Cord Inj Rehabil* 2015;**21**:49-60. doi: 10.1310/sci2101-49
35. Lynch J, Cahalan R. The impact of spinal cord injury on the quality of life of primary family caregivers: a literature review. *Spinal Cord* 2017;**55** doi: 10.1038/sc.2017.56
36. Goosey-Tolfrey VL, Paulson TA, Tolfrey K, et al. Prediction of peak oxygen uptake from differentiated ratings of perceived exertion during wheelchair propulsion in trained wheelchair sportspeople. *Eur J Appl Physiol* 2014;**114**:1251-8. doi: 10.1007/s00421-014-2850-9
37. Latimer-Cheung AE, Arbour-Nicitopoulos KP, Brawley LR, et al. Developing physical activity interventions for adults with spinal cord injury. Part 2: motivational counseling and peer-mediated interventions for people intending to be active. *Rehabil Psychol* 2013;**58**:307-15. doi: 10.1037/a0032816
38. Stacey D, Legare F, Lewis K, et al. Decision aids for people facing health treatment or screening decisions. *Cochrane Database Syst Rev* 2017;**4**:Cd001431. doi: 10.1002/14651858.CD001431.pub5
39. Eerden S, Dekker R, Hettinga FJ. Maximal and submaximal aerobic tests for wheelchair-dependent persons with spinal cord injury: a systematic review to summarize and identify useful applications for clinical rehabilitation. *Disabil Rehabil* 2017;**1**:1-25. doi: 10.1080/09638288.2017.1287623
40. Billinger SA, Tseng BY, Kluding PM. Modified total-body recumbent stepper exercise test for assessing peak oxygen consumption in people with chronic stroke. *Phys Ther* 2008;**88**:1188-95. doi: 10.2522/ptj.20080072
41. Billinger SA, Loudon JK, Gajewski BJ. Validity of a total body recumbent stepper exercise test to assess cardiorespiratory fitness. *J Strength Cond Res* 2008;**22**:1556-62. doi: 10.1519/JSC.0b013e3181739dd7
42. DiPiro ND, Embry AE, Fritz SL, et al. Effects of aerobic exercise training on fitness and walking-related outcomes in ambulatory individuals with chronic incomplete spinal cord injury. *Spinal Cord* 2016;**54**:675-81. doi: 10.1038/sc.2015.212
43. Nightingale TE, Walhin JP, Thompson D, et al. Predicting physical activity energy expenditure in wheelchair users with a multisensor device. *BMJ Open Sport Exerc Med* 2015;**1** doi: 10.1136/bmjsem-2015-000008
44. Brage S, Brage N, Franks PW, et al. Branched equation modeling of simultaneous accelerometry and heart rate monitoring improves estimate of directly measured physical activity energy expenditure. *J Appl Physiol (1985)* 2004;**96**:343-51. doi: 10.1152/jappphysiol.00703.2003
45. Compher C, Frankenfield D, Keim N, et al. Best practice methods to apply to measurement of resting metabolic rate in adults: a systematic review. *J Am Diet Assoc* 2006;**106**:881-903. doi: 10.1016/j.jada.2006.02.009
46. Fullmer S, Benson-Davies S, Earthman CP, et al. Evidence analysis library review of best practices for performing indirect calorimetry in healthy and non-critically ill individuals. *J Acad Nutr Diet* 2015;**115**:1417-46.e2. doi: 10.1016/j.jand.2015.04.003

- 1  
2  
3  
4 1 47. Nightingale TE, Rouse PC, Thompson D, et al. Measurement of physical activity and energy expenditure  
5 2 in wheelchair users: methods, considerations and future directions. *Sports Med Open* 2017;**3**:10.  
6 3 doi: 10.1186/s40798-017-0077-0  
7 4  
8 4 48. Silveira SL, Ledoux TA, Robinson-Whelen S, et al. Methods for classifying obesity in spinal cord injury: a  
9 5 review. *Spinal Cord* 2017;**55** doi: 10.1038/sc.2017.79  
10 6  
11 6 49. Piepoli MF, Hoes AW, Agewall S, et al. 2016 European guidelines on cardiovascular disease prevention  
12 7 in clinical practice: The Sixth Joint Task Force of the European Society of Cardiology and other  
13 8 societies on cardiovascular disease prevention in clinical practice (constituted by representatives of  
14 9 10 societies and by invited experts) developed with the special contribution of the European  
15 10 Association for Cardiovascular Prevention & Rehabilitation (EACPR). *Eur J Prev Cardiol* 2016;**23**:Np1-  
16 11 np96. doi: 10.1177/2047487316653709  
17 12  
18 12 50. Bauman WA, Biering-Sorensen F, Krassioukov A. The international spinal cord injury endocrine and  
19 13 metabolic function basic data set. *Spinal Cord* 2011;**49**:1068-72. doi: 10.1038/sc.2011.51  
20 14  
21 14 51. Bauman WA, Wecht JM, Biering-Sorensen F. International spinal cord injury endocrine and metabolic  
22 15 extended data set. *Spinal Cord* 2017;**55**:466-77. doi: 10.1038/sc.2016.164  
23 16  
24 16 52. Catz A, Itzkovich M, Tesio L, et al. A multicenter international study on the Spinal Cord Independence  
25 17 Measure, version III: Rasch psychometric validation. *Spinal Cord* 2007;**45**:275-91. doi:  
26 18 10.1038/sj.sc.3101960  
27 19  
28 19 53. Itzkovich M, Gelernter I, Biering-Sorensen F, et al. The Spinal Cord Independence Measure (SCIM)  
29 20 version III: reliability and validity in a multi-center international study. *Disabil Rehabil*  
30 21 2007;**29**:1926-33. doi: 10.1080/09638280601046302  
31 22  
32 22 54. Anderson KD, Acuff ME, Arp BG, et al. United States (US) multi-center study to assess the validity and  
33 23 reliability of the Spinal Cord Independence Measure (SCIM III). *Spinal Cord* 2011;**49**:880-5. doi:  
34 24 10.1038/sc.2011.20  
35 25  
36 25 55. Fekete C, Eriks-Hoogland I, Baumberger M, et al. Development and validation of a self-report version of  
37 26 the Spinal Cord Independence Measure (SCIM III). *Spinal Cord* 2013;**51**:40-7. doi:  
38 27 10.1038/sc.2012.87  
39 28  
40 28 56. Kirshblum S, Waring W, 3rd. Updates for the International Standards for Neurological Classification of  
41 29 Spinal Cord Injury. *Phys Med Rehabil Clin N Am* 2014;**25**:505-17, vii. doi: 10.1016/j.pmr.2014.04.001  
42 30  
43 30 57. Kirshblum SC, Burns SP, Biering-Sorensen F, et al. International standards for neurological classification  
44 31 of spinal cord injury (revised 2011). *J Spinal Cord Med* 2011;**34**:535-46. doi:  
45 32 10.1179/204577211x13207446293695  
46 33  
47 33 58. Poritz JMP, Mignogna J, Christie AJ, et al. The Patient Health Questionnaire depression screener in  
48 34 spinal cord injury. *J Spinal Cord Med* 2017:1-7. doi: 10.1080/10790268.2017.1294301  
49 35  
50 35 59. Charlifue S, Post MW, Biering-Sorensen F, et al. International spinal cord injury quality of life basic data  
51 36 set. *Spinal Cord* 2012;**50**:672-5. doi: 10.1038/sc.2012.27  
52 37  
53 37 60. Post MW, Adriaansen JJ, Charlifue S, et al. Good validity of the international spinal cord injury quality of  
54 38 life basic data set. *Spinal Cord* 2016;**54**:314-8. doi: 10.1038/sc.2015.99  
55 39  
56 39 61. Martin Ginis KA, Jorgensen S, Stapleton J. Exercise and sport for persons with spinal cord injury. *Pm r*  
57 40 2012;**4**:894-900. doi: 10.1016/j.pmrj.2012.08.006  
58 41  
59 41 62. Kroll T, Kehn M, Ho PS, et al. The SCI Exercise Self-Efficacy Scale (ESES): development and psychometric  
60 42 properties. *Int J Behav Nutr Phys Act* 2007;**4**:34. doi: 10.1186/1479-5868-4-34  
61 43  
62 43 63. Matthiessen J, Andersen LF, Barbieri HE, et al. The Nordic Monitoring System 2011–2014 status and  
63 44 development of diet, physical activity, smoking, alcohol and overweight. TemaNord, 2016.  
64 45  
65 45 64. Mathiessen J, Ander L, Barbieri H, et al. The Nordic monitoring of diet, physical activity, smoking,  
66 46 alcohol and overweight: 2011–2014. *European Journal of Nutrition & Food Safety* 2017;**7**:128-30.  
67 47  
68 47 65. Gater DR, Jr. Obesity after spinal cord injury. *Phys Med Rehabil Clin N Am* 2007;**18**:333-51, vii. doi:  
69 48 10.1016/j.pmr.2007.03.004  
70 49  
71 50  
72 51  
73 52  
74 53  
75 54  
76 55  
77 56  
78 57  
79 58  
80 59  
81 60

1  
2  
3  
4  
5  
6  
7  
8  
9  
10  
11  
12  
13  
14  
15  
16  
17  
18  
19  
20  
21  
22  
23  
24  
25  
26  
27  
28  
29  
30  
31  
32  
33  
34  
35  
36  
37  
38  
39  
40  
41  
42  
43  
44  
45  
46  
47  
48  
49  
50  
51  
52  
53  
54  
55  
56  
57  
58  
59  
60

66. Liusuwan RA, Widman LM, Abresch RT, et al. Behavioral intervention, exercise, and nutrition education to improve health and fitness (BENEFIT) in adolescents with mobility impairment due to spinal cord dysfunction. *J Spinal Cord Med* 2007;**30** Suppl 1:S119-26.
67. de Groot S, Dallmeijer AJ, Post MW, et al. The longitudinal relationship between lipid profile and physical capacity in persons with a recent spinal cord injury. *Spinal Cord* 2008;**46**:344-51. doi: 10.1038/sj.sc.3102147
68. Haisma JA, Post MW, van der Woude LH, et al. Functional independence and health-related functional status following spinal cord injury: a prospective study of the association with physical capacity. *J Rehabil Med* 2008;**40**:812-8. doi: 10.2340/16501977-0258
69. Janssen TW, van Oers CA, Veeger HE, et al. Relationship between physical strain during standardised ADL tasks and physical capacity in men with spinal cord injuries. *Paraplegia* 1994;**32**:844-59. doi: 10.1038/sc.1994.131
70. van Koppenhagen CF, Post M, de Groot S, et al. Longitudinal relationship between wheelchair exercise capacity and life satisfaction in patients with spinal cord injury: a cohort study in the Netherlands. *J Spinal Cord Med* 2014;**37**:328-37. doi: 10.1179/2045772313y.0000000167
71. de Groot S, Bevers G, Post MW, et al. Effect and process evaluation of implementing standardized tests to monitor patients in spinal cord injury rehabilitation. *Disabil Rehabil* 2010;**32**:588-97. doi: 10.3109/09638280903174414
72. Zanca JM, Dijkers MP, Hammond FM, et al. Pain and its impact on inpatient rehabilitation for acute traumatic spinal cord injury: analysis of observational data collected in the SCIRehab study. *Arch Phys Med Rehabil* 2013;**94**:S137-44. doi: 10.1016/j.apmr.2012.10.035
73. Anderson KD, Cowan RE, Horsewell J. Facilitators and barriers to spinal cord injury clinical trial participation: multi-national perspective of people living with spinal cord injury. *J Neurotrauma* 2016;**33**:493-9. doi: 10.1089/neu.2015.4064

**Figure 1.** Timeline for all sub studies and used outcome measures. Figure A and B illustrates the prospective historic control study and the intervention study respectively.

**Figure 2.** Timeline illustrated on the pocket card for systematic targeted approaches during primary rehabilitation within 2, 4 and 6 weeks after admission (AA) and during the last 4 and 2 weeks before discharge (BD) and at follow up 6 months after discharge. **PA:** Physical activity; **VO2peak:** peak oxygen uptake; **BMI:** Body Mass Index; **DXA:** Dual- energy X-ray Absorptiometry.

**Fig. A**

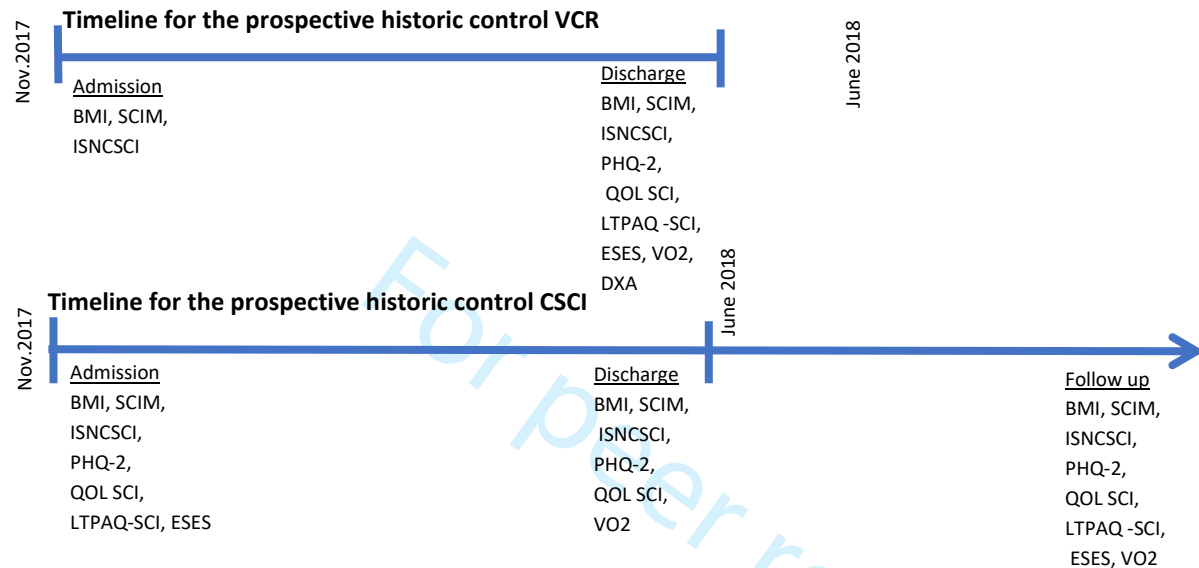

**Fig. B**

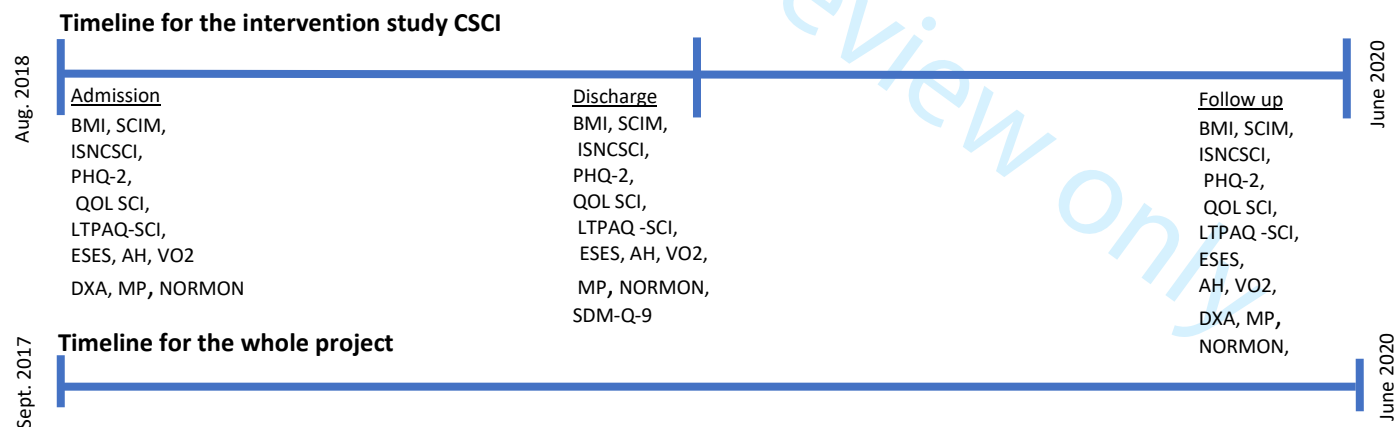

**VCR:** Center for Spinal Cord Injury, Western Denmark ; **CSCI:** Clinic for Spinal Cord Injuries, Eastern Denmark; **BMI:** Body Mass Index; **SCIM:** Spinal Cord Injury Independence Measure; **ISNCSCI:** International Standards for Neurological Classification of Spinal Cord Injury; **PHQ-2:** Patient Health Questionnaire- 2; **QOL SCI:** International SCI Quality of Life Basic Data Set; **LTPAQ-SCI:** Leisure Time Physical Activity Questionnaire for people With Spinal Cord Injury; **ESES:** Exercise Self Efficacy Scale ;**AH Actiheart (accelerometer); VO2peak:**peak oxygen uptake ;**DXA:** Dual- energy X-ray Absorptiometry **MP:** Metabolic profile;; **NORMON: Nordic monitoring of diet, physical activity and overweight; SDM-Q-9: 9-item Shared Decision Making Questionnaire**

1  
2  
3  
4  
5  
6  
7  
8  
9  
10  
11  
12  
13  
14  
15  
16  
17  
18  
19  
20  
21  
22  
23  
24  
25  
26  
27  
28  
29  
30  
31  
32  
33  
34  
35  
36  
37  
38  
39  
40  
41  
42  
43  
44  
45  
46  
47

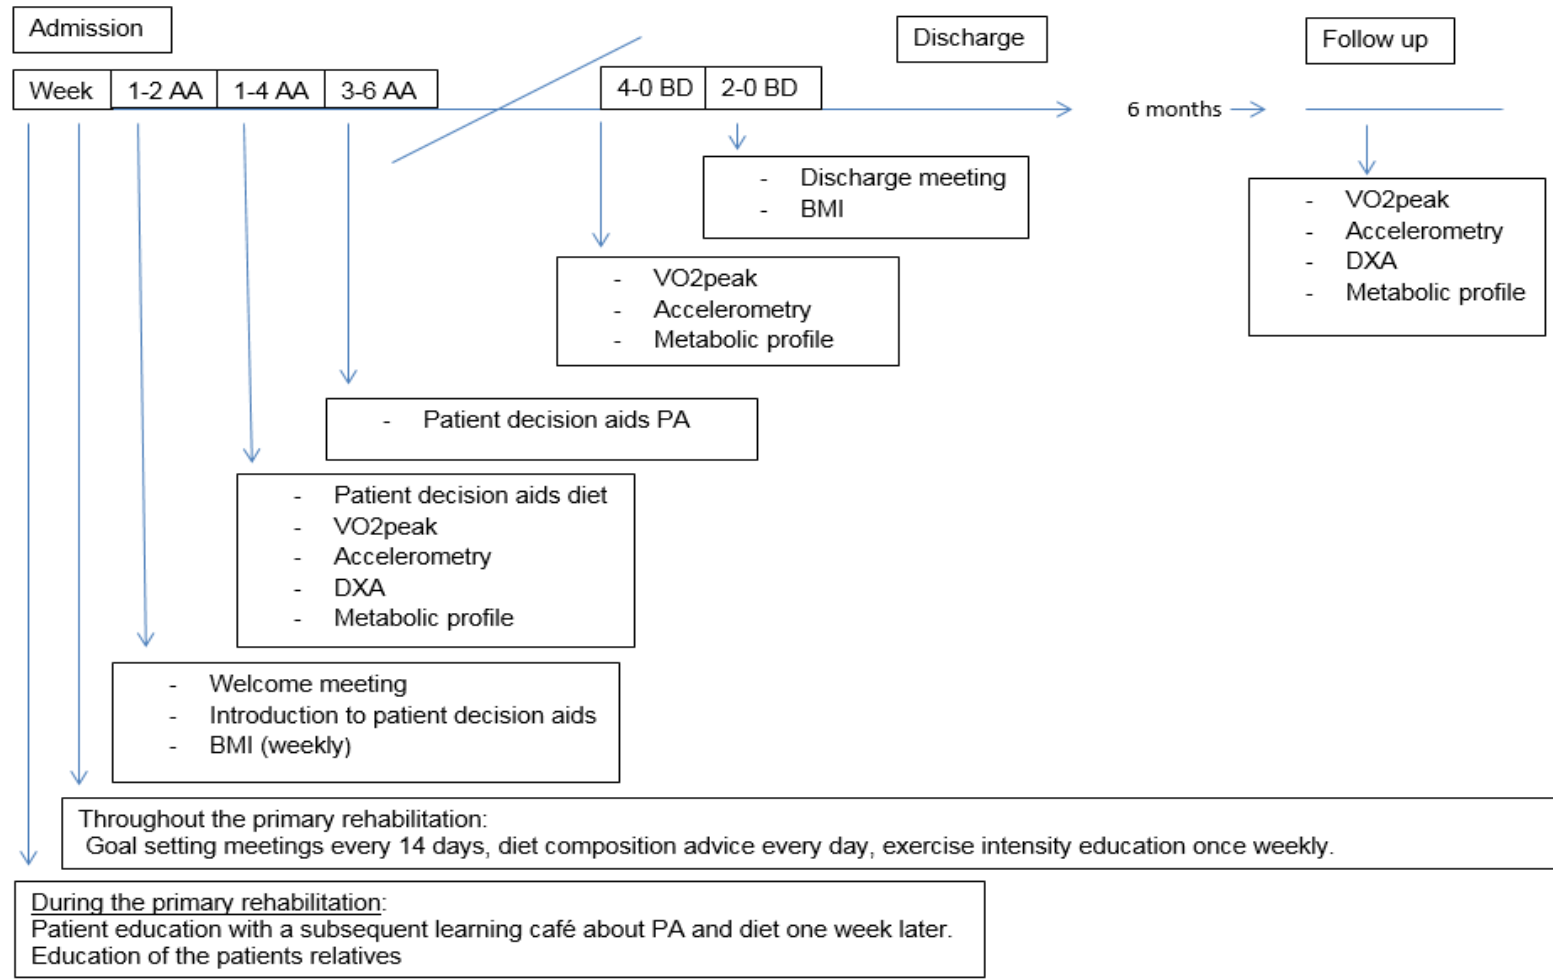

## Appendix: Strategic interventions

| Strategic interventions                                            | Scope/ Content                                                                                                                                                                                                                                                                                         | Procedure                                                                                                                                                                                                                                                        | Health care staff                                                                                                             | Process                                                                                                            |
|--------------------------------------------------------------------|--------------------------------------------------------------------------------------------------------------------------------------------------------------------------------------------------------------------------------------------------------------------------------------------------------|------------------------------------------------------------------------------------------------------------------------------------------------------------------------------------------------------------------------------------------------------------------|-------------------------------------------------------------------------------------------------------------------------------|--------------------------------------------------------------------------------------------------------------------|
| Pre- education of all health care professionals and peers with SCI | To prepare a uniform and systematic approach and clarifying the roles of each profession in relation to the targeted patient education, an evidence-based pre-education of the interdisciplinary health care personnel and peers with SCI is performed about cardiovascular risk, PA and healthy diet. | Pre-education is performed by stakeholders, as one session just before the intervention start-up. Pocket cards with evidence based basic recommendations related to PA and healthy diet in people with SCI are provided to all professions and peers with SCI.   | All health care professionals at the clinic, and all peers from the peer corps.                                               | The pre-education is performed multiple times until all health care professionals have attended the pre-education. |
| Patient education + session about diet and PA                      | To Inform the patients about SCI in general, including specific evidence based information about cardiovascular risk and overweight as a mandatory part, facilitating patients discussing healthy diet and PA                                                                                          | Patient education is performed face- to-face as a group session. Afterwards the patients discuss PA and healthy diet. Interdisciplinary health care professionals facilitates the session from evidence based information in the patient decision aids material. | Patient education: Medical doctors.<br><br>Session about diet and PA: Interdisciplinary health care professionals.            | Once                                                                                                               |
| Education of relatives                                             | To inform the relatives about SCI in general, including specific evidence based information about cardiovascular risk and overweight and the benefits of healthy diet and PA as a mandatory element.                                                                                                   | The session last a full day with face-to-face information and discussion about several aspects related to SCI and the role as a relative.                                                                                                                        | Interdisciplinary+ invited relatives to former patients sharing their experiences about being a relative to a person with SCI | Once                                                                                                               |
| Admission meeting                                                  | A group setting where patients and relatives are informed about the scope of the rehabilitation and consequences of a SCI.                                                                                                                                                                             | Information face- to-face about cardiovascular risk and overweight and the benefits of healthy diet and PA is provided                                                                                                                                           | Interdisciplinary team                                                                                                        | Once                                                                                                               |

Information and education in group sessions

|    |                                                                                    |                                                                                                                                                                         |                                                                                                                                                                                                                                                                                                  |                            |                                                                                      |
|----|------------------------------------------------------------------------------------|-------------------------------------------------------------------------------------------------------------------------------------------------------------------------|--------------------------------------------------------------------------------------------------------------------------------------------------------------------------------------------------------------------------------------------------------------------------------------------------|----------------------------|--------------------------------------------------------------------------------------|
| 1  |                                                                                    |                                                                                                                                                                         |                                                                                                                                                                                                                                                                                                  |                            |                                                                                      |
| 2  |                                                                                    |                                                                                                                                                                         |                                                                                                                                                                                                                                                                                                  |                            |                                                                                      |
| 3  |                                                                                    |                                                                                                                                                                         |                                                                                                                                                                                                                                                                                                  |                            |                                                                                      |
| 4  |                                                                                    |                                                                                                                                                                         |                                                                                                                                                                                                                                                                                                  |                            |                                                                                      |
| 5  |                                                                                    |                                                                                                                                                                         |                                                                                                                                                                                                                                                                                                  |                            |                                                                                      |
| 6  |                                                                                    |                                                                                                                                                                         |                                                                                                                                                                                                                                                                                                  |                            |                                                                                      |
| 7  |                                                                                    |                                                                                                                                                                         |                                                                                                                                                                                                                                                                                                  |                            |                                                                                      |
| 8  |                                                                                    |                                                                                                                                                                         |                                                                                                                                                                                                                                                                                                  |                            |                                                                                      |
| 9  |                                                                                    |                                                                                                                                                                         |                                                                                                                                                                                                                                                                                                  |                            |                                                                                      |
| 10 |                                                                                    |                                                                                                                                                                         |                                                                                                                                                                                                                                                                                                  |                            |                                                                                      |
| 11 |                                                                                    |                                                                                                                                                                         |                                                                                                                                                                                                                                                                                                  |                            |                                                                                      |
| 12 |                                                                                    |                                                                                                                                                                         |                                                                                                                                                                                                                                                                                                  |                            |                                                                                      |
| 13 |                                                                                    |                                                                                                                                                                         |                                                                                                                                                                                                                                                                                                  |                            |                                                                                      |
| 14 |                                                                                    |                                                                                                                                                                         |                                                                                                                                                                                                                                                                                                  |                            |                                                                                      |
| 15 |                                                                                    |                                                                                                                                                                         |                                                                                                                                                                                                                                                                                                  |                            |                                                                                      |
| 16 |                                                                                    |                                                                                                                                                                         |                                                                                                                                                                                                                                                                                                  |                            |                                                                                      |
| 17 |                                                                                    |                                                                                                                                                                         |                                                                                                                                                                                                                                                                                                  |                            |                                                                                      |
| 18 |                                                                                    |                                                                                                                                                                         |                                                                                                                                                                                                                                                                                                  |                            |                                                                                      |
| 19 |                                                                                    |                                                                                                                                                                         |                                                                                                                                                                                                                                                                                                  |                            |                                                                                      |
| 20 |                                                                                    |                                                                                                                                                                         |                                                                                                                                                                                                                                                                                                  |                            |                                                                                      |
| 21 |                                                                                    |                                                                                                                                                                         |                                                                                                                                                                                                                                                                                                  |                            |                                                                                      |
| 22 |                                                                                    |                                                                                                                                                                         |                                                                                                                                                                                                                                                                                                  |                            |                                                                                      |
| 23 |                                                                                    |                                                                                                                                                                         |                                                                                                                                                                                                                                                                                                  |                            |                                                                                      |
| 24 |                                                                                    |                                                                                                                                                                         |                                                                                                                                                                                                                                                                                                  |                            |                                                                                      |
| 25 |                                                                                    |                                                                                                                                                                         |                                                                                                                                                                                                                                                                                                  |                            |                                                                                      |
| 26 |                                                                                    |                                                                                                                                                                         |                                                                                                                                                                                                                                                                                                  |                            |                                                                                      |
| 27 |                                                                                    |                                                                                                                                                                         |                                                                                                                                                                                                                                                                                                  |                            |                                                                                      |
| 28 |                                                                                    |                                                                                                                                                                         |                                                                                                                                                                                                                                                                                                  |                            |                                                                                      |
| 29 |                                                                                    |                                                                                                                                                                         |                                                                                                                                                                                                                                                                                                  |                            |                                                                                      |
| 30 |                                                                                    |                                                                                                                                                                         |                                                                                                                                                                                                                                                                                                  |                            |                                                                                      |
| 31 | <b>Motivational physiologic<br/>outcome measures and<br/>face-to-face feedback</b> |                                                                                                                                                                         |                                                                                                                                                                                                                                                                                                  |                            |                                                                                      |
| 32 |                                                                                    |                                                                                                                                                                         |                                                                                                                                                                                                                                                                                                  |                            |                                                                                      |
| 33 |                                                                                    |                                                                                                                                                                         |                                                                                                                                                                                                                                                                                                  |                            |                                                                                      |
| 34 |                                                                                    |                                                                                                                                                                         |                                                                                                                                                                                                                                                                                                  |                            |                                                                                      |
| 35 |                                                                                    |                                                                                                                                                                         |                                                                                                                                                                                                                                                                                                  |                            |                                                                                      |
| 36 |                                                                                    |                                                                                                                                                                         |                                                                                                                                                                                                                                                                                                  |                            |                                                                                      |
| 37 |                                                                                    |                                                                                                                                                                         |                                                                                                                                                                                                                                                                                                  |                            |                                                                                      |
| 38 |                                                                                    |                                                                                                                                                                         |                                                                                                                                                                                                                                                                                                  |                            |                                                                                      |
| 39 |                                                                                    |                                                                                                                                                                         |                                                                                                                                                                                                                                                                                                  |                            |                                                                                      |
| 40 |                                                                                    |                                                                                                                                                                         |                                                                                                                                                                                                                                                                                                  |                            |                                                                                      |
| 41 |                                                                                    |                                                                                                                                                                         |                                                                                                                                                                                                                                                                                                  |                            |                                                                                      |
| 42 |                                                                                    |                                                                                                                                                                         |                                                                                                                                                                                                                                                                                                  |                            |                                                                                      |
| 43 |                                                                                    |                                                                                                                                                                         |                                                                                                                                                                                                                                                                                                  |                            |                                                                                      |
| 44 |                                                                                    |                                                                                                                                                                         |                                                                                                                                                                                                                                                                                                  |                            |                                                                                      |
| 45 |                                                                                    |                                                                                                                                                                         |                                                                                                                                                                                                                                                                                                  |                            |                                                                                      |
| 46 |                                                                                    |                                                                                                                                                                         |                                                                                                                                                                                                                                                                                                  |                            |                                                                                      |
|    | Discharge meeting                                                                  | A group setting where the patient and relatives are informed about the discharge in general, and how to manage consequences of the SCI in a new context after discharge | Information face- to-face about how to transfer the achieved knowledge and behaviors related to PA and healthy diet to a new context and information about the risk of low PA and gaining weight after discharge is provided.                                                                    | Interdisciplinary team     | Once                                                                                 |
|    | Diet composition advice                                                            | Recommendations about the diet composition at lunch servings is presented, based on the national nutrition guidelines.                                                  | Servings take place in a dining room. Visual material with diet composition recommendations is available and a plate model for inspiration is presented, with 200-300 gram of vegetables.                                                                                                        | Kitchen staff              | Every day                                                                            |
|    | Exercise intensity education                                                       | Education about evidence based exercise amount and intensity for reducing cardiovascular risk and how to monitor intensity by using ratings of perceived exertion       | The education is delivered by trained physiotherapists during group sessions of wheelchair skills training and cardiovascular exercise sessions.                                                                                                                                                 | Physiotherapist            | Once weekly                                                                          |
|    | BMI                                                                                | BMI is assessed as part of existing routines and the patient is informed about the course of BMI. Serves as motivational tool.                                          | Information is delivered to the patient face to face, in a private setting, with no other agendas. Evidence based actions related to BMI are discussed if relevant. Physiotherapists makes sure that the patient is up to date with total weight of the wheelchair and cushion before assessment | Nurses + Physiotherapists. | BMI and feedback is performed every week throughout the rehabilitation               |
|    | VO2peak                                                                            | VO2peak serves as a marker of physical capacity and the patient is informed about the test result and the course of physical capacity. Serves as motivational tool.     | Information is delivered to the patient face to face, in a private setting, with no other agendas. Evidence based actions related to physical capacity are discussed if relevant.                                                                                                                | Physiotherapists           | Measurement and subsequently feedback at:<br><br>Admission<br>Discharge<br>Follow up |



|    |  |  |  |  |  |
|----|--|--|--|--|--|
| 1  |  |  |  |  |  |
| 2  |  |  |  |  |  |
| 3  |  |  |  |  |  |
| 4  |  |  |  |  |  |
| 5  |  |  |  |  |  |
| 6  |  |  |  |  |  |
| 7  |  |  |  |  |  |
| 8  |  |  |  |  |  |
| 9  |  |  |  |  |  |
| 10 |  |  |  |  |  |
| 11 |  |  |  |  |  |
| 12 |  |  |  |  |  |
| 13 |  |  |  |  |  |
| 14 |  |  |  |  |  |
| 15 |  |  |  |  |  |
| 16 |  |  |  |  |  |
| 17 |  |  |  |  |  |
| 18 |  |  |  |  |  |
| 19 |  |  |  |  |  |
| 20 |  |  |  |  |  |
| 21 |  |  |  |  |  |
| 22 |  |  |  |  |  |
| 23 |  |  |  |  |  |
| 24 |  |  |  |  |  |
| 25 |  |  |  |  |  |
| 26 |  |  |  |  |  |
| 27 |  |  |  |  |  |
| 28 |  |  |  |  |  |
| 29 |  |  |  |  |  |
| 30 |  |  |  |  |  |
| 31 |  |  |  |  |  |
| 32 |  |  |  |  |  |
| 33 |  |  |  |  |  |
| 34 |  |  |  |  |  |
| 35 |  |  |  |  |  |
| 36 |  |  |  |  |  |
| 37 |  |  |  |  |  |
| 38 |  |  |  |  |  |
| 39 |  |  |  |  |  |
| 40 |  |  |  |  |  |
| 41 |  |  |  |  |  |
| 42 |  |  |  |  |  |
| 43 |  |  |  |  |  |
| 44 |  |  |  |  |  |
| 45 |  |  |  |  |  |
| 46 |  |  |  |  |  |

**Goalsetting and  
action planning  
(lifestyle changes)**



|                                     |                                                                                                                                      |                                                                                                                                                   |                        |                                                                                 |
|-------------------------------------|--------------------------------------------------------------------------------------------------------------------------------------|---------------------------------------------------------------------------------------------------------------------------------------------------|------------------------|---------------------------------------------------------------------------------|
|                                     | to help the patient consider each option in relation to his/her overall life situation and make a choice that fits the patient well. | patient, peers with SCI are accessible, ready to share their own experiences related to PA and diet.                                              |                        | <b>goalsetting meetings</b> approx. 4 and 5 weeks after admission respectively. |
| Goal setting meetings               | A setting with the patient where goals for the rehabilitation are defined including goals related to PA and healthy diet.            | Previous goals are evaluated and new goals are defined for the next 14 days. Asking the patient about goals for PA and healthy diet is mandatory. | Interdisciplinary team | Every 14 days                                                                   |
| Follow up 3 months after discharge. | Follow up in an outpatient setting on the course of BMI and healthy diet.                                                            | The follow-up is a face-to-face interaction based on the patient decision aids for diet                                                           | Nurses                 | Once                                                                            |

Interdisciplinary team: Medical doctor, nurse, physiotherapist, occupational therapist, social worker, psychologist.

SCI: Spinal Cord Injury; PA: Physical Activity; BMI: Body Mass Index; DXA: Dual-energy X-ray Absorptiometry

1  
2  
3  
4  
5  
6  
7  
8  
9  
10  
11  
12  
13  
14  
15  
16  
17  
18  
19  
20  
21  
22  
23  
24  
25  
26  
27  
28  
29  
30  
31  
32  
33  
34  
35  
36  
37  
38  
39  
40  
41  
42  
43  
44  
45  
46

# Reporting checklist for protocol of a clinical trial.

Based on the SPIRIT guidelines.

## Instructions to authors

Complete this checklist by entering the page numbers from your manuscript where readers will find each of the items listed below.

Your article may not currently address all the items on the checklist. Please modify your text to include the missing information. If you are certain that an item does not apply, please write "n/a" and provide a short explanation.

Upload your completed checklist as an extra file when you submit to a journal.

In your methods section, say that you used the SPIRIT reporting guidelines, and cite them as:

Chan A-W, Tetzlaff JM, Altman DG, Laupacis A, Gøtzsche PC, Krleža-Jerić K, Hróbjartsson A, Mann H, Dickersin K, Berlin J, Doré C, Parulekar W, Summerskill W, Groves T, Schulz K, Sox H, Rockhold FW, Rennie D, Moher D. SPIRIT 2013 Statement: Defining standard protocol items for clinical trials. *Ann Intern Med.* 2013;158(3):200-207

|                                             |                     | Reporting Item                                                                                               | Page Number |
|---------------------------------------------|---------------------|--------------------------------------------------------------------------------------------------------------|-------------|
| Title                                       | <a href="#">#1</a>  | Descriptive title identifying the study design, population, interventions, and, if applicable, trial acronym | 1           |
| Trial registration                          | <a href="#">#2a</a> | Trial identifier and registry name. If not yet registered, name of intended registry                         | 3           |
| Trial registration: data set                | <a href="#">#2b</a> | All items from the World Health Organization Trial Registration Data Set                                     | 3           |
| Protocol version                            | <a href="#">#3</a>  | Date and version identifier                                                                                  | 2           |
| Funding                                     | <a href="#">#4</a>  | Sources and types of financial, material, and other support                                                  | 13          |
| Roles and responsibilities: contributorship | <a href="#">#5a</a> | Names, affiliations, and roles of protocol contributors                                                      | 13          |

|    |                      |                     |                                                     |     |
|----|----------------------|---------------------|-----------------------------------------------------|-----|
| 1  | Roles and            | <a href="#">#5b</a> | Name and contact information for the trial          | 13  |
| 2  | responsibilities:    |                     | sponsor                                             |     |
| 3  | sponsor contact      |                     |                                                     |     |
| 4  | information          |                     |                                                     |     |
| 5  |                      |                     |                                                     |     |
| 6  |                      |                     |                                                     |     |
| 7  |                      |                     |                                                     |     |
| 8  | Roles and            | <a href="#">#5c</a> | Role of study sponsor and funders, if any, in       | 13  |
| 9  | responsibilities:    |                     | study design; collection, management, analysis,     |     |
| 10 | sponsor and funder   |                     | and interpretation of data; writing of the report;  |     |
| 11 |                      |                     | and the decision to submit the report for           |     |
| 12 |                      |                     | publication, including whether they will have       |     |
| 13 |                      |                     | ultimate authority over any of these activities     |     |
| 14 |                      |                     |                                                     |     |
| 15 |                      |                     |                                                     |     |
| 16 |                      |                     |                                                     |     |
| 17 | Roles and            | <a href="#">#5d</a> | Composition, roles, and responsibilities of the     | N/A |
| 18 | responsibilities:    |                     | coordinating centre, steering committee, endpoint   |     |
| 19 | committees           |                     | adjudication committee, data management team,       |     |
| 20 |                      |                     | and other individuals or groups overseeing the      |     |
| 21 |                      |                     | trial, if applicable (see Item 21a for data         |     |
| 22 |                      |                     | monitoring committee)                               |     |
| 23 |                      |                     |                                                     |     |
| 24 |                      |                     |                                                     |     |
| 25 |                      |                     |                                                     |     |
| 26 |                      |                     |                                                     |     |
| 27 | Background and       | <a href="#">#6a</a> | Description of research question and justification  | 3   |
| 28 | rationale            |                     | for undertaking the trial, including summary of     |     |
| 29 |                      |                     | relevant studies (published and unpublished)        |     |
| 30 |                      |                     | examining benefits and harms for each               |     |
| 31 |                      |                     | intervention                                        |     |
| 32 |                      |                     |                                                     |     |
| 33 |                      |                     |                                                     |     |
| 34 |                      |                     |                                                     |     |
| 35 |                      |                     |                                                     |     |
| 36 | Background and       | <a href="#">#6b</a> | Explanation for choice of comparators               | 3-4 |
| 37 | rationale: choice of |                     |                                                     |     |
| 38 | comparators          |                     |                                                     |     |
| 39 |                      |                     |                                                     |     |
| 40 |                      |                     |                                                     |     |
| 41 | Objectives           | <a href="#">#7</a>  | Specific objectives or hypotheses                   | 5   |
| 42 |                      |                     |                                                     |     |
| 43 | Trial design         | <a href="#">#8</a>  | Description of trial design including type of trial | 5   |
| 44 |                      |                     | (eg, parallel group, crossover, factorial, single   |     |
| 45 |                      |                     | group), allocation ratio, and framework (eg,        |     |
| 46 |                      |                     | superiority, equivalence, non-inferiority,          |     |
| 47 |                      |                     | exploratory)                                        |     |
| 48 |                      |                     |                                                     |     |
| 49 |                      |                     |                                                     |     |
| 50 |                      |                     |                                                     |     |
| 51 | Study setting        | <a href="#">#9</a>  | Description of study settings (eg, community        | 5   |
| 52 |                      |                     | clinic, academic hospital) and list of countries    |     |
| 53 |                      |                     | where data will be collected. Reference to where    |     |
| 54 |                      |                     | list of study sites can be obtained                 |     |
| 55 |                      |                     |                                                     |     |
| 56 |                      |                     |                                                     |     |
| 57 |                      |                     |                                                     |     |
| 58 |                      |                     |                                                     |     |
| 59 |                      |                     |                                                     |     |
| 60 |                      |                     |                                                     |     |

|    |                                 |                      |                                                                                                                                                                                                                                                                                                                                                                                |                                                                          |
|----|---------------------------------|----------------------|--------------------------------------------------------------------------------------------------------------------------------------------------------------------------------------------------------------------------------------------------------------------------------------------------------------------------------------------------------------------------------|--------------------------------------------------------------------------|
| 1  | Eligibility criteria            | <a href="#">#10</a>  | Inclusion and exclusion criteria for participants. If applicable, eligibility criteria for study centres and individuals who will perform the interventions (eg, surgeons, psychotherapists)                                                                                                                                                                                   | 6                                                                        |
| 2  |                                 |                      |                                                                                                                                                                                                                                                                                                                                                                                |                                                                          |
| 3  |                                 |                      |                                                                                                                                                                                                                                                                                                                                                                                |                                                                          |
| 4  |                                 |                      |                                                                                                                                                                                                                                                                                                                                                                                |                                                                          |
| 5  |                                 |                      |                                                                                                                                                                                                                                                                                                                                                                                |                                                                          |
| 6  |                                 |                      |                                                                                                                                                                                                                                                                                                                                                                                |                                                                          |
| 7  |                                 |                      |                                                                                                                                                                                                                                                                                                                                                                                |                                                                          |
| 8  | Interventions: description      | <a href="#">#11a</a> | Interventions for each group with sufficient detail to allow replication, including how and when they will be administered                                                                                                                                                                                                                                                     | 7-9                                                                      |
| 9  |                                 |                      |                                                                                                                                                                                                                                                                                                                                                                                |                                                                          |
| 10 |                                 |                      |                                                                                                                                                                                                                                                                                                                                                                                |                                                                          |
| 11 |                                 |                      |                                                                                                                                                                                                                                                                                                                                                                                |                                                                          |
| 12 |                                 |                      |                                                                                                                                                                                                                                                                                                                                                                                |                                                                          |
| 13 | Interventions: modifications    | <a href="#">#11b</a> | Criteria for discontinuing or modifying allocated interventions for a given trial participant (eg, drug dose change in response to harms, participant request, or improving / worsening disease)                                                                                                                                                                               | N/A Decisions related to the intervention are made by the clinical staff |
| 14 |                                 |                      |                                                                                                                                                                                                                                                                                                                                                                                |                                                                          |
| 15 |                                 |                      |                                                                                                                                                                                                                                                                                                                                                                                |                                                                          |
| 16 |                                 |                      |                                                                                                                                                                                                                                                                                                                                                                                |                                                                          |
| 17 |                                 |                      |                                                                                                                                                                                                                                                                                                                                                                                |                                                                          |
| 18 |                                 |                      |                                                                                                                                                                                                                                                                                                                                                                                |                                                                          |
| 19 |                                 |                      |                                                                                                                                                                                                                                                                                                                                                                                |                                                                          |
| 20 |                                 |                      |                                                                                                                                                                                                                                                                                                                                                                                |                                                                          |
| 21 | Interventions: adherence        | <a href="#">#11c</a> | Strategies to improve adherence to intervention protocols, and any procedures for monitoring adherence (eg, drug tablet return; laboratory tests)                                                                                                                                                                                                                              | 12-13                                                                    |
| 22 |                                 |                      |                                                                                                                                                                                                                                                                                                                                                                                |                                                                          |
| 23 |                                 |                      |                                                                                                                                                                                                                                                                                                                                                                                |                                                                          |
| 24 |                                 |                      |                                                                                                                                                                                                                                                                                                                                                                                |                                                                          |
| 25 |                                 |                      |                                                                                                                                                                                                                                                                                                                                                                                |                                                                          |
| 26 |                                 |                      |                                                                                                                                                                                                                                                                                                                                                                                |                                                                          |
| 27 |                                 |                      |                                                                                                                                                                                                                                                                                                                                                                                |                                                                          |
| 28 | Interventions: concomitant care | <a href="#">#11d</a> | Relevant concomitant care and interventions that are permitted or prohibited during the trial                                                                                                                                                                                                                                                                                  | 7                                                                        |
| 29 |                                 |                      |                                                                                                                                                                                                                                                                                                                                                                                |                                                                          |
| 30 |                                 |                      |                                                                                                                                                                                                                                                                                                                                                                                |                                                                          |
| 31 |                                 |                      |                                                                                                                                                                                                                                                                                                                                                                                |                                                                          |
| 32 | Outcomes                        | <a href="#">#12</a>  | Primary, secondary, and other outcomes, including the specific measurement variable (eg, systolic blood pressure), analysis metric (eg, change from baseline, final value, time to event), method of aggregation (eg, median, proportion), and time point for each outcome. Explanation of the clinical relevance of chosen efficacy and harm outcomes is strongly recommended | 9                                                                        |
| 33 |                                 |                      |                                                                                                                                                                                                                                                                                                                                                                                |                                                                          |
| 34 |                                 |                      |                                                                                                                                                                                                                                                                                                                                                                                |                                                                          |
| 35 |                                 |                      |                                                                                                                                                                                                                                                                                                                                                                                |                                                                          |
| 36 |                                 |                      |                                                                                                                                                                                                                                                                                                                                                                                |                                                                          |
| 37 |                                 |                      |                                                                                                                                                                                                                                                                                                                                                                                |                                                                          |
| 38 |                                 |                      |                                                                                                                                                                                                                                                                                                                                                                                |                                                                          |
| 39 |                                 |                      |                                                                                                                                                                                                                                                                                                                                                                                |                                                                          |
| 40 |                                 |                      |                                                                                                                                                                                                                                                                                                                                                                                |                                                                          |
| 41 |                                 |                      |                                                                                                                                                                                                                                                                                                                                                                                |                                                                          |
| 42 |                                 |                      |                                                                                                                                                                                                                                                                                                                                                                                |                                                                          |
| 43 |                                 |                      |                                                                                                                                                                                                                                                                                                                                                                                |                                                                          |
| 44 |                                 |                      |                                                                                                                                                                                                                                                                                                                                                                                |                                                                          |
| 45 | Participant timeline            | <a href="#">#13</a>  | Time schedule of enrolment, interventions (including any run-ins and washouts), assessments, and visits for participants. A schematic diagram is highly recommended (see Figure)                                                                                                                                                                                               | 7                                                                        |
| 46 |                                 |                      |                                                                                                                                                                                                                                                                                                                                                                                |                                                                          |
| 47 |                                 |                      |                                                                                                                                                                                                                                                                                                                                                                                |                                                                          |
| 48 |                                 |                      |                                                                                                                                                                                                                                                                                                                                                                                |                                                                          |
| 49 |                                 |                      |                                                                                                                                                                                                                                                                                                                                                                                |                                                                          |
| 50 |                                 |                      |                                                                                                                                                                                                                                                                                                                                                                                |                                                                          |
| 51 |                                 |                      |                                                                                                                                                                                                                                                                                                                                                                                |                                                                          |
| 52 |                                 |                      |                                                                                                                                                                                                                                                                                                                                                                                |                                                                          |
| 53 | Sample size                     | <a href="#">#14</a>  | Estimated number of participants needed to achieve study objectives and how it was determined, including clinical and statistical                                                                                                                                                                                                                                              | 7                                                                        |
| 54 |                                 |                      |                                                                                                                                                                                                                                                                                                                                                                                |                                                                          |
| 55 |                                 |                      |                                                                                                                                                                                                                                                                                                                                                                                |                                                                          |
| 56 |                                 |                      |                                                                                                                                                                                                                                                                                                                                                                                |                                                                          |
| 57 |                                 |                      |                                                                                                                                                                                                                                                                                                                                                                                |                                                                          |
| 58 |                                 |                      |                                                                                                                                                                                                                                                                                                                                                                                |                                                                          |
| 59 |                                 |                      |                                                                                                                                                                                                                                                                                                                                                                                |                                                                          |
| 60 |                                 |                      |                                                                                                                                                                                                                                                                                                                                                                                |                                                                          |

|    |                      |                      |                                                                                     |             |
|----|----------------------|----------------------|-------------------------------------------------------------------------------------|-------------|
| 1  |                      |                      | assumptions supporting any sample size                                              |             |
| 2  |                      |                      | calculations                                                                        |             |
| 3  |                      |                      |                                                                                     |             |
| 4  | Recruitment          | <a href="#">#15</a>  | Strategies for achieving adequate participant enrolment to reach target sample size | 6           |
| 5  |                      |                      |                                                                                     |             |
| 6  |                      |                      |                                                                                     |             |
| 7  |                      |                      |                                                                                     |             |
| 8  | Allocation:          | <a href="#">#16a</a> | Method of generating the allocation sequence                                        | N/A due to  |
| 9  | sequence             |                      | (eg, computer-generated random numbers), and                                        | consecutive |
| 10 | generation           |                      | list of any factors for stratification. To reduce                                   | enrollment  |
| 11 |                      |                      | predictability of a random sequence, details of                                     |             |
| 12 |                      |                      | any planned restriction (eg, blocking) should be                                    |             |
| 13 |                      |                      | provided in a separate document that is                                             |             |
| 14 |                      |                      | unavailable to those who enrol participants or                                      |             |
| 15 |                      |                      | assign interventions                                                                |             |
| 16 |                      |                      |                                                                                     |             |
| 17 |                      |                      |                                                                                     |             |
| 18 |                      |                      |                                                                                     |             |
| 19 |                      |                      |                                                                                     |             |
| 20 | Allocation           | <a href="#">#16b</a> | Mechanism of implementing the allocation                                            | N/A due to  |
| 21 | concealment          |                      | sequence (eg, central telephone; sequentially                                       | consecutive |
| 22 | mechanism            |                      | numbered, opaque, sealed envelopes),                                                | enrollment  |
| 23 |                      |                      | describing any steps to conceal the sequence                                        |             |
| 24 |                      |                      | until interventions are assigned                                                    |             |
| 25 |                      |                      |                                                                                     |             |
| 26 |                      |                      |                                                                                     |             |
| 27 |                      |                      |                                                                                     |             |
| 28 |                      |                      |                                                                                     |             |
| 29 | Allocation:          | <a href="#">#16c</a> | Who will generate the allocation sequence, who                                      | N/A due to  |
| 30 | implementation       |                      | will enrol participants, and who will assign                                        | consecutive |
| 31 |                      |                      | participants to interventions                                                       | enrollment  |
| 32 |                      |                      |                                                                                     |             |
| 33 |                      |                      |                                                                                     |             |
| 34 | Blinding (masking)   | <a href="#">#17a</a> | Who will be blinded after assignment to                                             | N/A due to  |
| 35 |                      |                      | interventions (eg, trial participants, care                                         | consecutive |
| 36 |                      |                      | providers, outcome assessors, data analysts),                                       | enrollment  |
| 37 |                      |                      | and how                                                                             |             |
| 38 |                      |                      |                                                                                     |             |
| 39 |                      |                      |                                                                                     |             |
| 40 |                      |                      |                                                                                     |             |
| 41 | Blinding (masking):  | <a href="#">#17b</a> | If blinded, circumstances under which unblinding                                    | N/A due to  |
| 42 | emergency            |                      | is permissible, and procedure for revealing a                                       | consecutive |
| 43 | unblinding           |                      | participant's allocated intervention during the trial                               | enrollment  |
| 44 |                      |                      |                                                                                     |             |
| 45 |                      |                      |                                                                                     |             |
| 46 | Data collection plan | <a href="#">#18a</a> | Plans for assessment and collection of outcome,                                     | 9           |
| 47 |                      |                      | baseline, and other trial data, including any                                       |             |
| 48 |                      |                      | related processes to promote data quality (eg,                                      |             |
| 49 |                      |                      | duplicate measurements, training of assessors)                                      |             |
| 50 |                      |                      | and a description of study instruments (eg,                                         |             |
| 51 |                      |                      | questionnaires, laboratory tests) along with their                                  |             |
| 52 |                      |                      | reliability and validity, if known. Reference to                                    |             |
| 53 |                      |                      | where data collection forms can be found, if not                                    |             |
| 54 |                      |                      | in the protocol                                                                     |             |
| 55 |                      |                      |                                                                                     |             |
| 56 |                      |                      |                                                                                     |             |
| 57 |                      |                      |                                                                                     |             |
| 58 |                      |                      |                                                                                     |             |
| 59 |                      |                      |                                                                                     |             |
| 60 |                      |                      |                                                                                     |             |

|    |                      |                      |                                                    |     |
|----|----------------------|----------------------|----------------------------------------------------|-----|
| 1  | Data collection      | <a href="#">#18b</a> | Plans to promote participant retention and         | 13  |
| 2  | plan: retention      |                      | complete follow-up, including list of any outcome  |     |
| 3  |                      |                      | data to be collected for participants who          |     |
| 4  |                      |                      | discontinue or deviate from intervention protocols |     |
| 5  |                      |                      |                                                    |     |
| 6  |                      |                      |                                                    |     |
| 7  |                      |                      |                                                    |     |
| 8  | Data management      | <a href="#">#19</a>  | Plans for data entry, coding, security, and        | 11  |
| 9  |                      |                      | storage, including any related processes to        |     |
| 10 |                      |                      | promote data quality (eg, double data entry;       |     |
| 11 |                      |                      | range checks for data values). Reference to        |     |
| 12 |                      |                      | where details of data management procedures        |     |
| 13 |                      |                      | can be found, if not in the protocol               |     |
| 14 |                      |                      |                                                    |     |
| 15 |                      |                      |                                                    |     |
| 16 |                      |                      |                                                    |     |
| 17 | Statistics:          | <a href="#">#20a</a> | Statistical methods for analysing primary and      | 11  |
| 18 | outcomes             |                      | secondary outcomes. Reference to where other       |     |
| 19 |                      |                      | details of the statistical analysis plan can be    |     |
| 20 |                      |                      | found, if not in the protocol                      |     |
| 21 |                      |                      |                                                    |     |
| 22 |                      |                      |                                                    |     |
| 23 |                      |                      |                                                    |     |
| 24 | Statistics:          | <a href="#">#20b</a> | Methods for any additional analyses (eg,           | 11  |
| 25 | additional analyses  |                      | subgroup and adjusted analyses)                    |     |
| 26 |                      |                      |                                                    |     |
| 27 |                      |                      |                                                    |     |
| 28 | Statistics: analysis | <a href="#">#20c</a> | Definition of analysis population relating to      | -   |
| 29 | population and       |                      | protocol non-adherence (eg, as randomised          |     |
| 30 | missing data         |                      | analysis), and any statistical methods to handle   |     |
| 31 |                      |                      | missing data (eg, multiple imputation)             |     |
| 32 |                      |                      |                                                    |     |
| 33 |                      |                      |                                                    |     |
| 34 |                      |                      |                                                    |     |
| 35 | Data monitoring:     | <a href="#">#21a</a> | Composition of data monitoring committee           | 11  |
| 36 | formal committee     |                      | (DMC); summary of its role and reporting           |     |
| 37 |                      |                      | structure; statement of whether it is independent  |     |
| 38 |                      |                      | from the sponsor and competing interests; and      |     |
| 39 |                      |                      | reference to where further details about its       |     |
| 40 |                      |                      | charter can be found, if not in the protocol.      |     |
| 41 |                      |                      | Alternatively, an explanation of why a DMC is not  |     |
| 42 |                      |                      | needed                                             |     |
| 43 |                      |                      |                                                    |     |
| 44 |                      |                      |                                                    |     |
| 45 |                      |                      |                                                    |     |
| 46 |                      |                      |                                                    |     |
| 47 |                      |                      |                                                    |     |
| 48 | Data monitoring:     | <a href="#">#21b</a> | Description of any interim analyses and stopping   | N/A |
| 49 | interim analysis     |                      | guidelines, including who will have access to      |     |
| 50 |                      |                      | these interim results and make the final decision  |     |
| 51 |                      |                      | to terminate the trial                             |     |
| 52 |                      |                      |                                                    |     |
| 53 |                      |                      |                                                    |     |
| 54 |                      |                      |                                                    |     |
| 55 |                      |                      |                                                    |     |
| 56 |                      |                      |                                                    |     |
| 57 |                      |                      |                                                    |     |
| 58 |                      |                      |                                                    |     |
| 59 |                      |                      |                                                    |     |
| 60 |                      |                      |                                                    |     |

|    |                                      |                      |                                                                                                                                                                                                                                    |     |
|----|--------------------------------------|----------------------|------------------------------------------------------------------------------------------------------------------------------------------------------------------------------------------------------------------------------------|-----|
| 1  | Harms                                | <a href="#">#22</a>  | Plans for collecting, assessing, reporting, and managing solicited and spontaneously reported adverse events and other unintended effects of trial interventions or trial conduct                                                  | 11  |
| 2  |                                      |                      |                                                                                                                                                                                                                                    |     |
| 3  |                                      |                      |                                                                                                                                                                                                                                    |     |
| 4  |                                      |                      |                                                                                                                                                                                                                                    |     |
| 5  |                                      |                      |                                                                                                                                                                                                                                    |     |
| 6  |                                      |                      |                                                                                                                                                                                                                                    |     |
| 7  |                                      |                      |                                                                                                                                                                                                                                    |     |
| 8  | Auditing                             | <a href="#">#23</a>  | Frequency and procedures for auditing trial conduct, if any, and whether the process will be independent from investigators and the sponsor                                                                                        | N/A |
| 9  |                                      |                      |                                                                                                                                                                                                                                    |     |
| 10 |                                      |                      |                                                                                                                                                                                                                                    |     |
| 11 |                                      |                      |                                                                                                                                                                                                                                    |     |
| 12 |                                      |                      |                                                                                                                                                                                                                                    |     |
| 13 | Research ethics approval             | <a href="#">#24</a>  | Plans for seeking research ethics committee / institutional review board (REC / IRB) approval                                                                                                                                      | 3   |
| 14 |                                      |                      |                                                                                                                                                                                                                                    |     |
| 15 |                                      |                      |                                                                                                                                                                                                                                    |     |
| 16 |                                      |                      |                                                                                                                                                                                                                                    |     |
| 17 | Protocol amendments                  | <a href="#">#25</a>  | Plans for communicating important protocol modifications (eg, changes to eligibility criteria, outcomes, analyses) to relevant parties (eg, investigators, REC / IRBs, trial participants, trial registries, journals, regulators) | 3   |
| 18 |                                      |                      |                                                                                                                                                                                                                                    |     |
| 19 |                                      |                      |                                                                                                                                                                                                                                    |     |
| 20 |                                      |                      |                                                                                                                                                                                                                                    |     |
| 21 |                                      |                      |                                                                                                                                                                                                                                    |     |
| 22 |                                      |                      |                                                                                                                                                                                                                                    |     |
| 23 |                                      |                      |                                                                                                                                                                                                                                    |     |
| 24 |                                      |                      |                                                                                                                                                                                                                                    |     |
| 25 | Consent or assent                    | <a href="#">#26a</a> | Who will obtain informed consent or assent from potential trial participants or authorised surrogates, and how (see Item 32)                                                                                                       | 3   |
| 26 |                                      |                      |                                                                                                                                                                                                                                    |     |
| 27 |                                      |                      |                                                                                                                                                                                                                                    |     |
| 28 |                                      |                      |                                                                                                                                                                                                                                    |     |
| 29 |                                      |                      |                                                                                                                                                                                                                                    |     |
| 30 | Consent or assent: ancillary studies | <a href="#">#26b</a> | Additional consent provisions for collection and use of participant data and biological specimens in ancillary studies, if applicable                                                                                              | N/A |
| 31 |                                      |                      |                                                                                                                                                                                                                                    |     |
| 32 |                                      |                      |                                                                                                                                                                                                                                    |     |
| 33 |                                      |                      |                                                                                                                                                                                                                                    |     |
| 34 |                                      |                      |                                                                                                                                                                                                                                    |     |
| 35 |                                      |                      |                                                                                                                                                                                                                                    |     |
| 36 | Confidentiality                      | <a href="#">#27</a>  | How personal information about potential and enrolled participants will be collected, shared, and maintained in order to protect confidentiality before, during, and after the trial                                               | 11  |
| 37 |                                      |                      |                                                                                                                                                                                                                                    |     |
| 38 |                                      |                      |                                                                                                                                                                                                                                    |     |
| 39 |                                      |                      |                                                                                                                                                                                                                                    |     |
| 40 |                                      |                      |                                                                                                                                                                                                                                    |     |
| 41 |                                      |                      |                                                                                                                                                                                                                                    |     |
| 42 |                                      |                      |                                                                                                                                                                                                                                    |     |
| 43 | Declaration of interests             | <a href="#">#28</a>  | Financial and other competing interests for principal investigators for the overall trial and each study site                                                                                                                      | 13  |
| 44 |                                      |                      |                                                                                                                                                                                                                                    |     |
| 45 |                                      |                      |                                                                                                                                                                                                                                    |     |
| 46 |                                      |                      |                                                                                                                                                                                                                                    |     |
| 47 |                                      |                      |                                                                                                                                                                                                                                    |     |
| 48 | Data access                          | <a href="#">#29</a>  | Statement of who will have access to the final trial dataset, and disclosure of contractual agreements that limit such access for investigators                                                                                    | 11  |
| 49 |                                      |                      |                                                                                                                                                                                                                                    |     |
| 50 |                                      |                      |                                                                                                                                                                                                                                    |     |
| 51 |                                      |                      |                                                                                                                                                                                                                                    |     |
| 52 |                                      |                      |                                                                                                                                                                                                                                    |     |
| 53 |                                      |                      |                                                                                                                                                                                                                                    |     |
| 54 |                                      |                      |                                                                                                                                                                                                                                    |     |
| 55 | Ancillary and post trial care        | <a href="#">#30</a>  | Provisions, if any, for ancillary and post-trial care, and for compensation to those who suffer harm from trial participation                                                                                                      | 11  |
| 56 |                                      |                      |                                                                                                                                                                                                                                    |     |
| 57 |                                      |                      |                                                                                                                                                                                                                                    |     |
| 58 |                                      |                      |                                                                                                                                                                                                                                    |     |
| 59 |                                      |                      |                                                                                                                                                                                                                                    |     |
| 60 |                                      |                      |                                                                                                                                                                                                                                    |     |

|    |                       |                      |                                                       |    |
|----|-----------------------|----------------------|-------------------------------------------------------|----|
| 1  | Dissemination         | <a href="#">#31a</a> | Plans for investigators and sponsor to                | 3  |
| 2  | policy: trial results |                      | communicate trial results to participants,            |    |
| 3  |                       |                      | healthcare professionals, the public, and other       |    |
| 4  |                       |                      | relevant groups (eg, via publication, reporting in    |    |
| 5  |                       |                      | results databases, or other data sharing              |    |
| 6  |                       |                      | arrangements), including any publication              |    |
| 7  |                       |                      | restrictions                                          |    |
| 8  |                       |                      |                                                       |    |
| 9  |                       |                      |                                                       |    |
| 10 |                       |                      |                                                       |    |
| 11 |                       |                      |                                                       |    |
| 12 | Dissemination         | <a href="#">#31b</a> | Authorship eligibility guidelines and any intended    | 13 |
| 13 | policy: authorship    |                      | use of professional writers                           |    |
| 14 |                       |                      |                                                       |    |
| 15 |                       |                      |                                                       |    |
| 16 | Dissemination         | <a href="#">#31c</a> | Plans, if any, for granting public access to the full | 11 |
| 17 | policy: reproducible  |                      | protocol, participant-level dataset, and statistical  |    |
| 18 | research              |                      | code                                                  |    |
| 19 |                       |                      |                                                       |    |
| 20 |                       |                      |                                                       |    |
| 21 | Informed consent      | <a href="#">#32</a>  | Model consent form and other related                  | 3  |
| 22 | materials             |                      | documentation given to participants and               |    |
| 23 |                       |                      | authorised surrogates                                 |    |
| 24 |                       |                      |                                                       |    |
| 25 |                       |                      |                                                       |    |
| 26 |                       |                      |                                                       |    |
| 27 | Biological            | <a href="#">#33</a>  | Plans for collection, laboratory evaluation, and      | 9  |
| 28 | specimens             |                      | storage of biological specimens for genetic or        |    |
| 29 |                       |                      | molecular analysis in the current trial and for       |    |
| 30 |                       |                      | future use in ancillary studies, if applicable        |    |
| 31 |                       |                      |                                                       |    |
| 32 |                       |                      |                                                       |    |
| 33 |                       |                      |                                                       |    |

34 The SPIRIT checklist is distributed under the terms of the Creative Commons Attribution License CC-  
 35 BY-ND 3.0. This checklist can be completed online using <https://www.goodreports.org/>, a tool made  
 36 by the [EQUATOR Network](#) in collaboration with [Penelope.ai](#)  
 37



# BMJ Open

## Health promotion and cardiovascular risk reduction in people with spinal cord injury - physical activity, healthy diet and maintenance after discharge: study protocol for a prospective national cohort study and pre-post intervention study

|                                 |                                                                                                                                                                                                                                                                                                                                                                                                                                                                                                                                                                                                                                                     |
|---------------------------------|-----------------------------------------------------------------------------------------------------------------------------------------------------------------------------------------------------------------------------------------------------------------------------------------------------------------------------------------------------------------------------------------------------------------------------------------------------------------------------------------------------------------------------------------------------------------------------------------------------------------------------------------------------|
| Journal:                        | <i>BMJ Open</i>                                                                                                                                                                                                                                                                                                                                                                                                                                                                                                                                                                                                                                     |
| Manuscript ID                   | bmjopen-2019-030310.R2                                                                                                                                                                                                                                                                                                                                                                                                                                                                                                                                                                                                                              |
| Article Type:                   | Protocol                                                                                                                                                                                                                                                                                                                                                                                                                                                                                                                                                                                                                                            |
| Date Submitted by the Author:   | 24-Oct-2019                                                                                                                                                                                                                                                                                                                                                                                                                                                                                                                                                                                                                                         |
| Complete List of Authors:       | Holm, Nicolaj; Rigshospitalet, Neuroscience Center, Clinic for Spinal Cord Injuries<br>Møller, Tom; The University Hospitals Centre for Health Research, UCSF Copenhagen University Hospital Rigshospitalet , Department 9701<br>Adamsen, Lis; The University Hospitals Centre for Health Research, UCSF Copenhagen University Hospital Rigshospitalet , Department 9701<br>Dalsgaard, Line; Rigshospitalet, Neuroscience Center, Clinic for Spinal Cord Injuries<br>Biering-Sorensen, Fin; Rigshospitalet, Neuroscience Center, Clinic for Spinal Cord Injuries<br>Schou, Lone; University College Copenhagen, Department of Nursing and Nutrition |
| <b>Primary Subject Heading</b>: | Rehabilitation medicine                                                                                                                                                                                                                                                                                                                                                                                                                                                                                                                                                                                                                             |
| Secondary Subject Heading:      | Neurology                                                                                                                                                                                                                                                                                                                                                                                                                                                                                                                                                                                                                                           |
| Keywords:                       | Spinal Cord Injuries, Metabolic Syndrome, Health Promotion, Exercise, Diet Therapy                                                                                                                                                                                                                                                                                                                                                                                                                                                                                                                                                                  |
|                                 |                                                                                                                                                                                                                                                                                                                                                                                                                                                                                                                                                                                                                                                     |

SCHOLARONE™  
Manuscripts

**TITLE PAGE**

Health promotion and cardiovascular risk reduction in people with spinal cord injury - physical activity, healthy diet and maintenance after discharge: study protocol for a prospective national cohort study and pre-post intervention study

**Authors:**

Nicolaj Jersild Holm ([nicolaj.jersild.holm@regionh.dk](mailto:nicolaj.jersild.holm@regionh.dk)), Rigshospitalet, Neuroscience Center, Clinic for Spinal Cord Injuries, Hornbæk, Denmark.

Tom Møller ([tom@ucsf.dk](mailto:tom@ucsf.dk)), University Hospitals Centre for Health Care Research, University hospital Copenhagen, Rigshospitalet, Denmark.

Lis Adamsen ([la@ucsf.dk](mailto:la@ucsf.dk)), University Hospitals Centre for Health Care Research, University hospital Copenhagen, Rigshospitalet, Denmark.

Line Dalsgaard ([line.trine.dalsgaard@regionh.dk](mailto:line.trine.dalsgaard@regionh.dk)), Rigshospitalet, Neuroscience Center, Clinic for Spinal Cord Injuries, Hornbæk, Denmark.

Fin Biering-Sørensen ([fin.biering-soerensen@regionh.dk](mailto:fin.biering-soerensen@regionh.dk)), Rigshospitalet, Neuroscience Center, Clinic for Spinal Cord Injuries, Hornbæk, Denmark.

Lone Helle Schou ([lohs@kp.dk](mailto:lohs@kp.dk)), University College Copenhagen, Department of Nursing and Nutrition, Copenhagen, Denmark.

Keywords: Spinal Cord Injuries, Metabolic Syndrome, Health Promotion, Exercise, Diet Therapy

Corresponding Author: Nicolaj Jersild Holm ([nicolaj.jersild.holm@regionh.dk](mailto:nicolaj.jersild.holm@regionh.dk)), phone: +45 38631963, Rigshospitalet, Neuroscience Center, Clinic for Spinal Cord Injuries, Havnevej 25, 3100, Hornbæk, Denmark

Word count: 5.757

Version: 2.2 date: 21.10.19

## ABSTRACT

**Introduction** Spinal cord injury (SCI) predisposes those who suffer from it to physical inactivity and weight gain; consequently, death due to cardiovascular diseases is more frequent among people with SCI than in the general population. The literature documents a consensus about an interdisciplinary multimodal approach for the prevention and treatment of cardiovascular risk factors including overweight and obesity in people with SCI, focusing on diet, physical activity (PA) and behavioral interventions. This study will investigate implementation of recommendations from a recent clinical practice guideline for identification and management of cardiometabolic risk after SCI through multimodal patient education in a subacute clinical setting.

**Methods and analysis** All patients who are aged 18 years or older with an SCI within the previous 12 months and admitted to highly specialized rehabilitation are included, regardless of SCI etiology or neurological level. A primary study designed as a controlled pre-post pragmatic intervention study with 6-month follow up evaluates the effect of the clinical intervention; a prospective national cohort study on body mass index (BMI) serves as a historical control. The intervention consists of a standardized approach to patient education about cardiovascular risk factors, PA and a healthy diet that begins at the outset of primary SCI rehabilitation and is integrated into existing settings and workflows. Outcome measures are collected at admission, discharge and 6 months after discharge and include VO<sub>2</sub>peak (primary outcome), BMI, body composition, metabolic profile, neurologic status, level of functioning, depression, quality of life, objective PA (accelerometry), self-reported PA, self-assessed physical activity ability, shared decision making, and dietary habits. Test-retest reliability of four VO<sub>2</sub>peak test protocols are investigated, as is test-retest reliability of a multisensor accelerometer in a rehabilitation setting.

## Ethics and dissemination

The project is approved by the Committees on Health Research Ethics in the Capital Region of Denmark on 10.07.2018 (Journal-nr.: H-18018325). The principal investigator obtains Informed consent from all participants. The interventions in the project are closely related to existing rehabilitation care, and the risk of pain and discomfort is considered modest. Any unintended events related to the elements of the intervention are reported, according to existing regional procedures. Data are stored in a secure web-based database (Redcap). The primary study and prospective cohort study are registered at Clinicaltrials.gov. Positive and negative results will be submitted to relevant scientific journals related to SCI for publication. Important protocol modifications are reported to the Committees on Health Research Ethics in the Capital Region of Denmark.

## Registration details

The project is approved by the Danish Data Protection Agency (j.nr. VD-2018-380, I-Suite nr.: 6631) and (RH-2017-345, I-Suite nr.: 06052). The project is registered at Clinicaltrials.gov (NCT03689023) and (NCT03369080).

## Article summary

### Strengths and limitations of this study

The prospective cohort study includes both SCI centers in Denmark and the intervention study includes all newly injured people with SCI admitted to rehabilitation at the East Denmark SCI-center.

Four predefined protocols for assessing VO<sub>2</sub>peak are used due to the heterogeneity of functional level in the SCI population.

The pre-post intervention study is based on a pragmatic real-life approach by including existing settings and work flows, which is a strength, but consistent implementation of multimodal interventions may be challenging due to changes in the clinical setting.

Lack of randomization is a study limitation.

## INTRODUCTION

**Table 1.** World Health Organization Trial Registration Data Set (Version 1.3.1)

| Data category                                 | Information <sup>32</sup>                                                                                                                                                                                                                                                                                                                                                                          |
|-----------------------------------------------|----------------------------------------------------------------------------------------------------------------------------------------------------------------------------------------------------------------------------------------------------------------------------------------------------------------------------------------------------------------------------------------------------|
| Primary registry and trial identifying number | ClinicalTrials.gov (NCT03369080) and (NCT03689023).                                                                                                                                                                                                                                                                                                                                                |
| Date of registration in primary registry      | 12.11.2017 and 26.09.2018                                                                                                                                                                                                                                                                                                                                                                          |
| Secondary identifying numbers                 | The Committees on Health Research Ethics in the Capital Region of Denmark on 10.07.2018 (Journal-nr.: H-18018325) and the Danish Data Protection Agency (j.nr. VD-2018-380, I-Suite nr.: 6631) and (RH-2017-345, I-Suite nr.: 06052)                                                                                                                                                               |
| Source(s) of monetary or material support     | This work was supported by a mutual cooperation about the research program "Centre for Integrated Rehabilitation of Cancer Patients (CIRE) - Neuro/Psychology", between the University Hospitals Centre for Health Care Research, University hospital Copenhagen, Rigshospitalet, University College Copenhagen, Department of Nursing and Nutrition, and the Neuroscience Centre, Rigshospitalet. |
| Primary sponsor                               | This work was supported by a mutual cooperation about the research program "Centre for Integrated Rehabilitation of Cancer Patients (CIRE) - Neuro/Psychology", between the University Hospitals Centre for Health Care Research, University hospital Copenhagen, Rigshospitalet, University College                                                                                               |

|                                           |                                                                                                                                                                                                                                                                                                                                                                                          |
|-------------------------------------------|------------------------------------------------------------------------------------------------------------------------------------------------------------------------------------------------------------------------------------------------------------------------------------------------------------------------------------------------------------------------------------------|
|                                           | Copenhagen, Department of Nursing and Nutrition, and the NeuroScience Centre, Rigshospitalet.                                                                                                                                                                                                                                                                                            |
| Secondary sponsor(s)                      |                                                                                                                                                                                                                                                                                                                                                                                          |
| Contact for public queries                | Nicolaj Jersild Holm ( <a href="mailto:nicolaj.jersild.holm@regionh.dk">nicolaj.jersild.holm@regionh.dk</a> ), phone: +45 38631963, Rigshospitalet, Neuroscience Center, Clinic for Spinal Cord Injuries, Havnevej 25, 3100, Hornbæk, Denmark                                                                                                                                            |
| Contact for scientific queries            | Nicolaj Jersild Holm ( <a href="mailto:nicolaj.jersild.holm@regionh.dk">nicolaj.jersild.holm@regionh.dk</a> ), phone: +45 38631963, Rigshospitalet, Neuroscience Center, Clinic for Spinal Cord Injuries, Havnevej 25, 3100, Hornbæk, Denmark                                                                                                                                            |
| Public title                              | Health promotion and cardiovascular risk reduction in people with spinal cord injury - physical activity, healthy diet and maintenance after discharge: study protocol for a national cohort study followed by a clinical intervention study.                                                                                                                                            |
| Scientific title                          | Health promotion and cardiovascular risk reduction in people with spinal cord injury - physical activity, healthy diet and maintenance after discharge: study protocol for a prospective national cohort study followed by a pre-post intervention study.                                                                                                                                |
| Countries of recruitment                  | Denmark                                                                                                                                                                                                                                                                                                                                                                                  |
| Health condition(s) or problem(s) studied | Spinal Cord Injury and the cardiovascular risk factor, including weight gain and consequences of an inactive lifestyle during and after the primary rehabilitation.                                                                                                                                                                                                                      |
| Intervention(s)                           | A controlled pre-post multi modal pragmatic clinical intervention study, with 6-months of follow up containing “new usual care” consisting of a uniform and systematic institutional strategy incorporating targeted strategic patient education about cardiovascular risk factors, physical activity and a healthy diet lifestyle starting early in the primary rehabilitation process. |
|                                           | Comparator: A historic control conducted as a national prospective cohort study before “new usual care”                                                                                                                                                                                                                                                                                  |
| Key inclusion and                         | Inclusion criteria: All patients who are 18 years or older, and with a Spinal Cord Injury (SCI) within the last 12 months and admitted at Clinic for Spinal Cord                                                                                                                                                                                                                         |

|                         |                                                                                                                                                                                                                                                                                                                                                                                          |
|-------------------------|------------------------------------------------------------------------------------------------------------------------------------------------------------------------------------------------------------------------------------------------------------------------------------------------------------------------------------------------------------------------------------------|
| exclusion criteria      | Injuries, are included regardless of etiology to the SCI, neurological level or completeness of the lesion if informed consent is retrieved.                                                                                                                                                                                                                                             |
|                         | Exclusion criteria: Exclusion criteria for VO <sub>2</sub> peak test in the study includes motor complete SCI at C4 level or above, and assisted ventilatory function. Other exclusion criteria are the presence of decubitus, severe spasticity or musculoskeletal problems considered at risk of aggravation during testing or preventing completion of the VO <sub>2</sub> peak test. |
| Study type              | Interventional. The study consists of a primary study designed as a controlled pre-post clinical intervention study and a historic control conducted as a prospective cohort study.                                                                                                                                                                                                      |
|                         | Allocation: The intervention in the primary study is a part of new standard care. Therefore randomization or blinding is not appropriate.                                                                                                                                                                                                                                                |
|                         | Primary purpose: prevention                                                                                                                                                                                                                                                                                                                                                              |
| Date of first enrolment | November 2017                                                                                                                                                                                                                                                                                                                                                                            |
| Target sample size      | 160                                                                                                                                                                                                                                                                                                                                                                                      |
| Recruitment status      | Recruiting                                                                                                                                                                                                                                                                                                                                                                               |
| Primary outcome(s)      | Oxygen uptake measured as VO <sub>2</sub> peak.                                                                                                                                                                                                                                                                                                                                          |
| Key secondary outcomes  | Body Mass Index, Body composition (determined by Dual energy x-ray absorptiometry), metabolic profile consisting of CRP as a marker for inflammation, lipid profile describing Total cholesterol, Triglycerides, HDL cholesterol, and LDL cholesterol and Hemoglobin A1c as a marker for carbohydrate metabolism, and blood pressure (BP).                                               |
| Ethics Review           | The project is approved by the Committees on Health Research Ethics in the Capital Region of Denmark on 10.07.2018 (Journal-nr.: H-18018325)                                                                                                                                                                                                                                             |
| Completion data         | June 2020                                                                                                                                                                                                                                                                                                                                                                                |
| IPD sharing statement   | Data can be accessed by request to the corresponding author after publications related to the Ph.D project are made.                                                                                                                                                                                                                                                                     |

The annual incidence of traumatic spinal cord injury (SCI) in Denmark is 10-15 per million [1], while nontraumatic SCI has accounted for approximately 60% of all newly injured patients admitted to the two SCI centers in Denmark in recent years. SCI is a life-changing event that may affect all bodily functions below the level of the lesion, requiring highly specialized interdisciplinary rehabilitation aiming at the

1  
2  
3  
4 highest possible level of independent functioning and resulting in significant costs to affected individuals  
5 and society. Rehabilitation at the Clinic for Spinal Cord Injuries in Eastern Denmark (CSCI) generally includes  
6 functional training, strength training, cardiovascular exercise and fine motor training of the upper  
7 extremities. In addition, circulation, respiration, thermoregulation, bowel and bladder function, skin  
8 integrity, pain and spasticity are continually assessed and addressed, and aids are provided to compensate  
9 for functional losses, including communication aids and splinting. Counseling to address social and  
10 economic issues, sexual function and psychological issues is provided.  
11  
12  
13

14 Over the long term, SCI and resulting impairments predispose affected individuals to increased  
15 cardiovascular risk and premature cardiovascular death; a clinical practice guideline addressing  
16 cardiometabolic disease after SCI was recently published [2]. However, targeted patient education  
17 addressing long-term cardiovascular risk, based on individualized face-to-face interaction between patients  
18 and health care professionals and aiming at a core clinical outcome, is not systematically integrated into  
19 early stages of specialized SCI rehabilitation at CSCI, even though an opportunity may exist to target the link  
20 between injury-related immediate impacts on functionality and long-term health consequences [3 4].  
21 Similarly, health promotion education and activities related to body mass index (BMI), diet, smoking,  
22 alcohol intake and physical activity (PA) are not systematically provided, and assessment of physical  
23 capacity, metabolic profile and body composition is not a part of standard care. A systematic approach  
24 may ensure that all patients at CSCI receive information and knowledge related to health promotion and  
25 the risk of cardiovascular disease, which may support patient adaptation and adherence to recommended  
26 PA and healthy diet.  
27  
28  
29  
30

31 As a result, cardiovascular risk factors, including weight gain and the consequences of an inactive lifestyle  
32 during and after primary rehabilitation, are the focus of the current study.  
33  
34

### 35 **The course of overweight**

36  
37 The prevalence of overweight in people with SCI is conservatively estimated at 66%. Overweight has been  
38 found to be one of the most common cardiometabolic risk factors among people with SCI, increasing the  
39 cardiovascular risk profile of wheelchair-dependent people with paraplegia [5], [6] [7 8]. Energy  
40 expenditure decreases significantly after sustaining a SCI and remains low. Although body fat and body  
41 weight decrease in the acute injury phase, they increase in the subacute phase, and a loss of lean body  
42 mass in the lower extremities and trunk has been observed during the first year after injury [9]. BMI  
43 increases gradually during the first years after discharge from primary rehabilitation [10]. Obese people  
44 with SCI achieve a lower level of functioning during primary rehabilitation than do those of normal weight  
45 [11]. Overweight in people with SCI is associated with increased risk of depression [12]. Nutritional  
46 education delivered by a dietician or lifestyle coach has been found promising [13-15], although it is often  
47 not offered in a clinical setting [16]. Increased knowledge about weight management among clinicians is  
48 recommended, but weight management is often not prioritized in rehabilitation settings. Clinicians have  
49 called for evidence-based knowledge and clinical guidelines [16 17].  
50  
51  
52  
53

### 54 **Impact of physical activity on health and fitness**

55  
56 In the general population, PA is associated with beneficial effects on diseases contributing to the metabolic  
57 syndrome, and its beneficial effect increases when it is combined with diet therapy [18]. Similar effects of  
58  
59  
60



1  
2  
3  
4 PA among people with SCI have been described; numerous studies have reported the positive effects of PA  
5 intervention programs in people with both acute and chronic SCI on physical capacity, strength and  
6 functional performance, including the effect of exercise interventions on cardiometabolic health [19 20].  
7 Evidence-based exercise guidelines for cardiometabolic health in people with SCI recommend a minimum  
8 of 30 minutes of moderate to vigorous aerobic exercise three times weekly to reduce cardiovascular risk  
9 factors [21]. The long-term effect increases when PA is combined with behavioral interventions [22].  
10 However, not all people with SCI are able to participate in PA intervention programs or maintain PA. Rates  
11 of participation in leisure time PA and in sports activities after discharge from primary rehabilitation are low  
12 among people with SCI [23 24]. Intra- and extrapersonal factors influence participation in PA, including self-  
13 efficacy related to being physically active [25]. PA alone is insufficient to induce weight loss in people with  
14 SCI [2]. Therefore, a broader approach to cardiovascular risk reduction may be appropriate, and a  
15 combination of several interventions is required to promote a physically active lifestyle and weight loss  
16 [26]. Examples of key intervention components are autonomy in relation to decision-making and behavioral  
17 interventions comprising goal setting and feedback via physical assessments [26 27].

22  
23 Although the separate or combined effects of PA, diet and behavioral interventions have been investigated  
24 previously in people with SCI with generally positive results, this study will investigate the effect of  
25 educational and behavioral interventions related to PA and diet in a subacute clinical rehabilitation setting.  
26 The study will investigate implementation of recommendations from the recent clinical practice guideline  
27 for identification and management of cardiometabolic risk after SCI, including assessments of physical  
28 capacity, body composition, bodyweight, dyslipidemia and impaired fasting glucose, as well as PA and diet  
29 [2]. Feedback on these assessments and goal setting will be part of the patient education delivered by  
30 clinical staff across settings during primary rehabilitation.

31  
32  
33  
34 To the best of our knowledge, only a single study has investigated outcomes related to cardiovascular risk  
35 factors following PA and behavioral interventions during subacute inpatient rehabilitation using outcomes  
36 related to cardiovascular risk factors, but this study only included wheelchair users [28 29]. The current  
37 study will contribute to existing knowledge by consecutively enrolling all patients, aged 18 years or older,  
38 with a new SCI who are admitted to CSCI, regardless of mobility status, and by evaluating the  
39 implementation of evidence-based guidelines for identification and management of cardiometabolic risk  
40 after SCI in a clinical setting.

#### 41 42 43 44 **Objectives**

45  
46 This study will investigate the effect of a systematic approach to incorporating targeted patient education  
47 about cardiovascular risk factors, PA and a healthy diet early in the primary rehabilitation process,  
48 compared to a historical control group.

#### 49 50 51 **STUDY DESIGN**

52  
53 The primary study comprises a primary study designed as a controlled pre-post pragmatic intervention  
54 study with 6 months of follow up. A prospective national cohort study provides a historical control (Fig 1).

#### 55 56 57 **Substudies**

58  
59  
60

1  
2  
3  
4 BMI is considered a high-risk determinant due to the impact of overweight on the cardiovascular risk profile  
5 and level of functioning among wheelchair-dependent people with SCI [5], [6] [7 8]. A prospective  
6 representative longitudinal survey of BMI conducted before the controlled intervention in collaboration  
7 with SCI Center of Western Denmark serves as a historical control (substudy 1). Additional outcome  
8 measures will be collected at CSCI during the survey period, including measures of PA, physical capacity and  
9 body composition. Two substudies of test-retest reliability of a VO<sub>2</sub>peak test (substudy 2) and a  
10 multisensor accelerometer (substudy 3) will be performed. VO<sub>2</sub>peak and accelerometry are considered  
11 valid methods to measure the effect, amount and intensity of PA at discharge from primary SCI  
12 rehabilitation. Both will be collected repeatedly during the primary study and serve as individual  
13 motivational components in education and communication, as well as outcome measures. Assessing test-  
14 retest reliability of the two procedures is essential.  
15  
16  
17  
18

## 19 **METHODS AND ANALYSIS**

20  
21 The SPIRIT reporting guidelines are used in the reporting of the clinical trial [30].  
22

### 23 **Patient involvement**

24  
25 A user panel consisting of six patients (three women and three men aged 23 to 78 years), including both  
26 recently injured people and those who had been living with SCI for some time, was established and  
27 involved in the early phase of study protocol development. All participants were hospitalized at CSCI when  
28 they participated in semi-structured focus group interviews about their perceptions of health promotion  
29 practices in the clinical setting [31]. The interview focused on both the existing level of information about  
30 increased risk of overweight and cardiovascular disease after SCI and education about diet and PA as a way  
31 of reducing those risks. Data were analyzed using constant comparative analysis [32]. The user panel  
32 recommended more information in the early phase of rehabilitation about cardiovascular risk, PA and diet  
33 and more support and guidance about appropriate diet and being physically active, which is the primary  
34 aim of the project. The study results will be disseminated to project participants.  
35  
36  
37  
38

### 39 **Participants and eligibility criteria**

40  
41 Inpatients who are aged 18 years or older, injured with SCI within the last 12 months and admitted at CSCI  
42 are recruited and consecutively included after providing informed consent, regardless of SCI etiology (i.e.,  
43 traumatic or non-traumatic), neurological level or completeness<sup>1</sup> of the lesion. In substudy 1, all newly  
44 injured people with SCI admitted at the SCI Centre of Western Denmark are also included. Substudy 1  
45  
46  
47

---

48  
49 <sup>1</sup> The completeness of the injury is graded according to the ASIA Impairment Scale (AIS). AIS is used to  
50 determine the degree of motor and sensory function below the level of the SCI. A complete or incomplete  
51 injury is defined as absence or presence of sensory and motor function in the most caudal sacral segments.  
52 A = sensory and motor complete; B = sensory incomplete without motor function > 3 levels below the  
53 motor level of injury on both sides of the body; C = motor incomplete, with preserved motor function  
54 below the level of injury and where > 50% of the key muscles below the injury level have a degree < 3 by  
55 manual muscle test (MMT); D = motor incomplete with preserved motor function below the level of injury  
56 and where > 50% of key muscles below the injury level have a degree > 3 by MMT; E = normal sensory and  
57 motor function in all segments.  
58  
59  
60

1  
2  
3  
4 serves as a historical control group, and the intervention in the primary study is part of a new standard of  
5 care. Therefore, randomization, blinding and sample size calculation are not appropriate.  
6

7  
8 Exclusion criteria for the VO<sub>2</sub>peak test include motor complete SCI (AIS A and B) at cervical (C)4 level or  
9 above and a need for artificial ventilation. Other exclusion criteria are the presence of decubiti, severe  
10 spasticity or musculoskeletal problems at risk of exacerbation or aggravation during testing or preventing  
11 completion of the test.  
12

13  
14 Substudy 3 includes a convenience sample of 20 patients with the goal of ensuring variation in age, gender,  
15 neurological level and completeness of SCI.  
16

17  
18 Primary study: A systematic interdisciplinary multimodal intervention that facilitates physical activity,  
19 healthy diet and maintenance after discharge through strategic patient education as part of usual care,  
20 with the aim of decreasing cardiovascular risk  
21

22  
23 This pre-post study includes all patients aged 18 years or older with a new SCI who are admitted at CSCI  
24 during a period of 12 to 18 months. The study includes follow up 6 months after discharge from primary  
25 rehabilitation.  
26

27  
28 Approximately 70 patients with a new SCI are admitted to CSCI annually; but due to expected missing data ,  
29 complete data sets from admission through follow up may be fewer.  
30

### 31 **Intervention**

32  
33 The intervention is based on recommendations in a recently released clinical practice guideline for the  
34 identification and management of cardiometabolic risk after SCI and conclusions from a meta- synthesis by  
35 Williams et al. and a systematic review by Greaves et al. [2 26 27]. A combination of several interventions is  
36 most effective at promoting a physically active lifestyle and weight loss after SCI. Crucial intervention  
37 components are autonomy in relation to decision-making about PA, support and follow up from health care  
38 professionals and mentors with SCI, information about adapted PA and behavioral interventions comprising  
39 goal setting and feedback from, for example, physical tests. Greaves et al. recommend group sessions,  
40 individual sessions and interdisciplinary interventions in the clinical setting that focus on maintaining PA  
41 and healthy diet [26].  
42  
43

44  
45 The intervention will be integrated into usual care during the project period, and all newly injured patients  
46 will receive all multimodal components as appropriate to individual circumstances, such as level of injury.  
47 At discharge, the patient will describe adherence to the intervention and document participation in  
48 targeted education elements on a checklist. Similarly, health care professionals will use a checklist to  
49 document adherence to interventions at the start, midpoint and end of the study period. Medical records  
50 and schedules for goal-setting meetings will also be reviewed to monitor health care professionals'  
51 adherence to the interventions. Rehabilitation of the physical level of functioning and physical capacity  
52 (e.g., physiotherapy) will occur as part of usual care and is a mandatory core component of highly  
53 specialized SCI rehabilitation. However, decisions about PA made by the patient during rehabilitation may  
54 be integrated into the rehabilitation program to achieve his or her goals for PA during and after the  
55 rehabilitation period.  
56  
57  
58  
59  
60

1  
2  
3  
4 A central part of the intervention is to create a standardized approach to targeted strategic patient  
5 education of patients about cardiovascular risk factors, PA and a healthy diet by systematizing the existing  
6 clinical setting and treatment interventions.  
7

8  
9 In the process of reorganizing the institutional approach to addressing cardiovascular risks, *pre-education*  
10 of interdisciplinary health care personnel and peers with SCI is mandatory to clarify their roles in relation to  
11 targeted patient education. Pocket cards with evidence-based recommendations related to PA, diet and  
12 BMI in people with SCI are provided to all health care professionals and peers with SCI and will also  
13 illustrate the timeline for systematic targeted approaches during primary rehabilitation (Fig. 2)  
14  
15

16 Patients receive information and instructions about PA and healthy diet through patient education based  
17 on principles that include individualized face-to-face interaction between patients and health care  
18 professionals while working towards a specific health-related outcome [33]. The interventions begin at the  
19 outset of primary SCI rehabilitation and are integrated into usual care at predetermined time points (e.g.,  
20 DXA scan, VO<sub>2</sub>peak, metabolic profile with feedback early after admission to rehabilitation and goal setting  
21 meetings about PA and diet within 6 weeks after admission) throughout the entire rehabilitation  
22 continuum, with the goal of secondary and tertiary cardiovascular prevention.  
23  
24  
25

26 Representatives of all the health care professions generally carry out education of patients and their  
27 relatives in a variety of educational settings [34 35], with a focus on clarifying the importance of PA and a  
28 healthy diet. Patient education involves training sessions [36] and feedback on physiological outcome  
29 measures and tests that also serve as motivational tools. Additionally, goal-setting meetings, tools for  
30 shared decision making [37] [26] [38] and use of mentors with SCI are also integrated as components  
31 supporting decision making about PA and healthy diet. BMI and diet are evaluated 3 months after discharge  
32 in an outpatient setting (see appendix for a more detailed description of the strategic interventions).  
33  
34  
35

36 All components are offered to patients as a mandatory part of the intervention, ensuring that information  
37 and patient education are provided and decisions about PA and healthy diet are made. However, patients  
38 individually determine the extent to which they engage in making decisions and setting goals about PA and  
39 healthy diet. Interdisciplinary health care professionals respect the decisions and autonomy of patients  
40 who choose not to set goals or make decisions about PA and healthy diet.  
41  
42

43 Several outcome measures used to evaluate the intervention at admission, discharge and at follow up 6  
44 months after discharge are also motivational components of the intervention: BMI, body composition  
45 measured by dual- energy X-ray absorptiometry (DXA), physical capacity (VO<sub>2</sub>peak), PA (Actiheart  
46 multisensor accelerometer) and blood samples describing metabolic profile.  
47  
48

49 Substudy 1. Prospective national survey of body mass index among people with SCI

50  
51 This study includes all patients with a new SCI hospitalized at CSCI or SCI Center of Western Denmark during  
52 a period of 10 months; 100 patients are expected to participate. Data on BMI, level of functioning (Spinal  
53 Cord Injury Independence Measure III [SCIM III]) and neurological status (International Standards for  
54 Neurological Classification of SCI [ISNCSCI]) are collected at both centers. Patients with an SCI within the last  
55 12 months who are admitted for rehabilitation several months after injury are also included in the  
56 prospective survey. Data on BMI at the time of injury are collected for all patients at admission to primary  
57 rehabilitation from the patient's medical record. At CSCI, BMI every 6 weeks, quality of life (QoL SCI),  
58  
59  
60

1  
2  
3  
4 depression (PHQ-2), amount of PA (Leisure Time Physical Activity Questionnaire for people with Spinal Cord  
5 Injury [LTPAQ-SCI]) and self- assessed ability to be physically active (ESES) will be collected at admission,  
6 discharge and follow up 6 months after discharge. Measures of physical capacity (VO<sub>2</sub>peak) and body  
7 composition (DXA) are also obtained at discharge. Data from this substudy serve as a historical control for  
8 the Intervention study.  
9  
10

#### 11 Substudy 2. Test-retest reliability of VO<sub>2</sub>peak testing

12  
13 This study includes all patients participating in substudy 1 who are able to perform the VO<sub>2</sub>peak test at  
14 discharge from primary rehabilitation. Patients are randomized to a test session of either intra- or  
15 interrater reliability. Due to the complexity of SCI, four pre-defined exercise protocols are used to reach  
16 criteria for VO<sub>2</sub>peak, defined as a respiratory exchange ratio (RER) > 1.0 [39]. As a starting point, people  
17 with an incomplete SCI, as defined by ISNCSCI, will use a seated cross-trainer (NuStep T5XR®), which has  
18 software incorporating both a standard and a modified test protocol. The standard protocol starts at 50  
19 watts (W) with 25W incremental increases every 2 minutes in the first three stages, 30 W increments  
20 thereafter and 115 steps per minute (SPM). The modified protocol starts at 25W with 15W increments  
21 every 2 minutes and 80 SPM. The equipment and modified protocol are reliable in people with traumatic  
22 brain injury and has been validated in healthy persons [40 41]. In people with an incomplete SCI, the  
23 equipment is safe and involves a large amount of muscle mass [42]. People with an ISNCSCI-defined  
24 complete SCI, very de-conditioned patients or those with an incomplete SCI but a poor ISNCSCI lower  
25 extremity motor score that may hinder reaching VO<sub>2</sub>peak on the seated cross trainer will use an arm-  
26 cranking ergometer (SCI FIT Pro1®). Test protocols used on the SCI FIT ergometer are established from the  
27 most common protocols for people with tetra- and paraplegia during rehabilitation reported in a recent  
28 systematic review [39]. The study protocols are designed as stage protocols starting at 5 W with an increase  
29 every minute of 5W for people with tetraplegia and 10W for people with paraplegia and 60 revolutions per  
30 minute.  
31  
32  
33  
34  
35  
36

37 If predefined criteria for VO<sub>2</sub>peak are not reached during test 1, a more suitable protocol to reach VO<sub>2</sub>peak  
38 is chosen for test 2 and will be retested at test 3. However, this is not possible if the protocol designed for  
39 people with tetraplegia is used. The test-retest study takes place at discharge, with 48 hours to 5 days  
40 between tests occurring at the same time of the day. Participants refrain from caffeine, alcohol and  
41 intensive physical exercise on the day of testing, as well as tobacco smoking two hours before testing.  
42 Bladder emptying occurs immediately before testing.  
43  
44  
45

46 In the intervention study, the four exercise protocols are used to ensure that a true VO<sub>2</sub>peak is reached  
47 during the rehabilitation process. VO<sub>2</sub>peak is highly dependent on the level and completeness of the SCI  
48 and the testing equipment; for instance, a patient may be initially tested on the protocol designed for  
49 people with a complete tetraplegia and later tested on the non-modified standard protocol in the seated  
50 cross trainer due to neurological recovery and improvement in functional level.  
51  
52

#### 53 Substudy 3. Test-retest reliability of a multisensor accelerometer

54  
55 This study includes a convenience sample of 20 patients ensuring a representative sample of individuals  
56 with para- and tetraplegia, complete and incomplete SCI, age and gender. The equipment used for  
57 monitoring the amount and intensity of PA consists of sensors registering acceleration and heart rate and is  
58  
59  
60

1  
2  
3  
4 placed on the thorax of the participant with two surface electrodes. The sensor can be dismantled from the  
5 thorax without removing the adhesive part of the surface electrodes, making it possible to easily reattach  
6 the sensor and resume monitoring after e.g. sleeping or bathing. Data are expressed as total and daily  
7 physical activity energy expenditure (kcal/min) and the time spent in different activity intensities on the  
8 basis of metabolic equivalents. The equipment has been previously used among wheelchair-dependent  
9 people with SCI, although its reliability in an inpatient setting has not been assessed [43]. Precision is higher  
10 when the equipment is calibrated to individual participants using measures of energy expenditure and  
11 corresponding heart rate during rest and during exercise testing, covering a range of submaximal and  
12 maximal intensities. The equipment software uses these data to estimate energy expenditure using  
13 branched model equations [44]. This method will also take into account compromised cardiac sympathetic  
14 innervation in individuals with an injury above T6. In this study, individual calibration is based on activity  
15 performed during the VO<sub>2</sub>peak test (substudy 2), with resting metabolic rate measured before testing for  
16 10 minutes following a rest period of 20 minutes [45 46]. In order to reliably measure total energy  
17 expenditure (kcal/min) and the amount and intensity of PA patients are instructed to wear the equipment  
18 for 48 hours. They are informed to take off the sensor (not the adhesive part) when bathing, but if they  
19 experience discomfort or skin irritation related to the equipment they can as well remove the adhesive part  
20 of the electrode. If they have impaired or absent sensation, they are recommended to take off the  
21 equipment when sleeping, and to check for skin irritation regularly, alternatively asking a nurse for help if  
22 they are not able to do this themselves. A period of 48 hours with sampling epochs every 15 seconds and a  
23 minimum wear-time of 80% is aimed for, and considered an appropriate wear time as described by  
24 Nightingale et al [47]. However, data from recordings with < 80% wear time will be analyzed as well. To  
25 ensure comparability, test-retest procedures are performed over a period of two weeks on identical days of  
26 the week .

## 34 Outcome measures

35 Outcome measures evaluating the intervention comprise the following.

### 36 Primary outcome

37 *Oxygen uptake* is measured as VO<sub>2</sub>peak during a maximal exercise test and is the gold standard for  
38 measuring aerobic capacity. For people with SCI, several test protocols have been used [36].

### 39 Secondary outcomes

40 *Objective PA* is measured in a subsample of the historical control cohort and participants in the  
41 intervention study with a multisensor device (Actiheart®) recording accelerations and heart rate. It  
42 has been previously used for wheelchair users with SCI, and individual calibration is important to  
43 get the most accurate data [47]. Evidence-based exercise guidelines for cardiometabolic health in  
44 people with SCI recommend a minimum of 30 minutes of moderate to vigorous aerobic exercise  
45 three times weekly [21]

46 *Bodyweight* is measured as BMI, which is the most widely used outcome measure for body weight in  
47 people with SCI. BMI is not sensitive enough to distinguish between fat mass and lean body mass or  
48 overweight in people with SCI. Overweight among adults with SCI is defined as  $\geq 22\text{kg/m}^2$  [48] [2]. BMI is  
49



1  
2  
3  
4 already collected as part of usual care, and data for BMI every 6 weeks until discharge will be included in  
5 the project.  
6

7 *Body composition* is determined by dual energy X-ray absorptiometry (DXA), which is the gold standard for  
8 assessing obesity and body composition. Among adults with SCI, men with >22% body fat and women with  
9 >35% body fat should be classified as obese [2].  
10  
11

12 *Metabolic profile* consists of C-reactive protein (CRP) as a marker for inflammation and lipid profile  
13 including total cholesterol, triglycerides, high-density lipoprotein cholesterol (HDL-C) and low-density  
14 lipoprotein cholesterol (LDL-C), which are included in the international SCI Endocrine and Metabolic  
15 Function Basic Data Set. Triglycerides should not be  $\geq 150$  mg/dL (1.7 mmol/L). HDL-C should not be < 40  
16 mg/dL (1.03 mmol/L) in men or < 50 mg/dL (1.29 mmol/L) in women [2]. LDL-C should not be > 3.0 mmol/l  
17 [49]. Hemoglobin A1c (HbA1c) serves as a marker for carbohydrate metabolism and is included in the  
18 International SCI Endocrine and Metabolic Extended Data Set [50 51]. Criteria for a diagnosis of prediabetes  
19 include HbA1c 5.7-6.4% (39-47 mmol/mol) and criteria for a diagnosis of diabetes include HbA1c > 6.5% (>  
20 48 mmol/mol) [2]. As approved by the Committees on Health Research Ethics in the Capital Region of  
21 Denmark, blood samples will not be stored after analysis.  
22  
23  
24  
25

26 *Blood pressure (BP)* is measured by sphygmomanometry. Criteria for a diagnosis of hypertension in people  
27 with SCI vary with injury level, severity and etiology. BP should not exceed 130/85 mm Hg.  
28

29 *Level of functioning* is determined by the SCIM III, which is a valid and reliable outcome measure designed  
30 to assess level of functioning in people with SCI in clinical care and research [52] [53 54] [55].  
31  
32

33 *Neurologic* status is determined by the ISNCSCI and is the most widely used classification in people with SCI  
34 [56 57].  
35

36 *Depression* is measured by the Patient Health Questionnaire-2 (PHQ-2), which is a generic measure of  
37 depression. Among people with SCI, a cut-off score of 3 is associated with sensitivity of 83.3% and  
38 specificity of 95.7% [58].  
39  
40

41 *Quality of life* is measured by the International SCI Quality of Life Basic Data Set (QoL SCI), which consists of  
42 three questions about satisfaction with life in general and physical and mental health. It is a valid outcome  
43 measure with good internal consistency [59] [60].  
44  
45

46 *Self-reported PA* is measured by the Leisure Time Physical Activity Questionnaire for people with SCI  
47 (LTPAQ-SCI), which is a self-administered questionnaire about leisure time PA, including amount and  
48 intensity during the past 7 days. Reliability and validity of self-reported activity are satisfactory in moderate  
49 and high intensity levels [61]. An additional question concerning PA outside of leisure time PA (i.e., PA as  
50 part of rehabilitation) is included in substudy 1. The question is designed to be similar to the original  
51 questions and is scored using the same intensity scale. During the intervention study, a version of LTPAQ-  
52 SCI adjusted to a Danish context will be used. This version is approved by the developers of the original  
53 LTPAQ-SCI and includes active transportation and active physiotherapy.  
54  
55

56 *Self-assessed ability to be physically active* is measured by the Exercise Self Efficacy Scale for people with  
57 SCI (ESES). It is an outcome measure developed for assessing self-efficacy related to PA in people with SCI  
58  
59  
60



1  
2  
3  
4 and consists of 10 questions on a 0-4 response scale. ESES is reliable with high internal consistency  
5 (Cronbach's alpha 0.94) and satisfactory content validity in the form of face and construct validity [62].  
6

7  
8 *Shared decision making related to patient decision aids for PA and healthy diet* is measured by the 9-item  
9 Shared Decision Making Questionnaire (SDM-Q-9), which assesses the process of shared decision making  
10 between health care professionals and the patient from the patient's perspective. SDM-Q-9 consists of nine  
11 statements, which can be rated on a six-point scale from 0 to 5, with higher scores indicating greater  
12 shared decision making. All items are summed to yield a raw total score of 0 to 45. SDM Q-9 is only used  
13 at discharge.  
14

15  
16 *Varied and healthy diet in an appropriate amount* is measured by the Nordic monitoring of diet, PA and  
17 overweight (NORMON) developed in a Nordic collaboration and commonly used for monitoring [63]. The  
18 questionnaire explores how frequently 16 food indicators, several of which are recommended in the Nordic  
19 national nutritional recommendations, have been consumed over the previous 12 months. NORMON also  
20 includes questions related to alcohol intake, smoking and PA. The questionnaire was validated in 2009  
21 against existing questionnaires about diet [64]. In this study, a modified version of the questionnaire will  
22 ask patients to recall their dietary habits over the previous month.  
23  
24

## 25 26 **Statistics**

27  
28 All data collected at admission, discharge and follow up are continuous and are reported descriptively. In  
29 the intervention study, differences in the primary and secondary outcomes between baseline and follow up  
30 will be analyzed using analysis of covariance. The same approach will be used between baseline and follow  
31 up in the historic control study. Likewise differences between the intervention study and the historic  
32 control is analyzed using analysis of covariance. Due to the small sample size, participants in the  
33 intervention study and historic control will not be matched but participants will be compared to each other  
34 controlling for ISNCSCI classification, gender and functional level. a. Linear regression is used to measure  
35 the strength and association between BMI and DXA results and the association between the psychometric  
36 variables e.g. QoL and depression compared to VO<sub>2</sub>peak and BMI. Ordinal regression analysis is made for  
37 ordinal data e.g. ESES. Missing data are analyzed as intention to treat without imputation, but dropout  
38 analysis is made for primary outcomes. In substudies 3 and 4, the reliability of the outcome measures are  
39 analyzed by paired t-test, Pearson's product-moment correlation and coefficient of variation or intraclass  
40 correlation coefficient between the test-retest sessions. .  
41  
42  
43  
44

## 45 46 **Ethics and dissemination**

47  
48 The project is approved by the Committees on Health Research Ethics in the Capital Region of Denmark on  
49 10.07.2018 (Journal-nr.: H-18018325). During the intervention period, all newly injured patients who are  
50 admitted for rehabilitation at CSCI are offered treatment and tests included in the intervention as a  
51 mandatory part of usual care to the extent they are able to participate, which may vary with the level of  
52 lesion and completeness of SCI. Because the intervention is a part of usual care and comprises a  
53 standardized approach to patient education, no data monitoring or interim analysis is planned. Informed  
54 consent is obtained to analyze the data generated during the project. The intervention in the project is  
55 closely related with the content of the present rehabilitation, and the risk of pain and discomfort is  
56 considered modest. During the VO<sub>2</sub>peak test, special attention is paid to potential symptoms of autonomic  
57  
58  
59  
60

1  
2  
3  
4 dysreflexia (AD) in people with SCI above T5-6. In case of AD, the exercise test is stopped and relevant  
5 actions are initiated. It is assumed that any risks are surpassed by therapeutic gains, i.e. expected  
6 reductions in the risk of cardiovascular disease and mortality. Any unintended events related to the  
7 intervention are reported according to existing regional procedures, and compensation is covered by the  
8 normal procedures for unintended harm during hospitalization. The study is reported to the Danish Data  
9 Protection Agency and is registered at Clinicaltrials.gov (See World Health Organization Trial Registration  
10 Data Set (Version 1.3.1) (Table 1). Positive and negative results will be submitted to relevant scientific  
11 journals related to SCI for publication.  
12  
13  
14

#### 15 **Data statement section**

16  
17 All patient data are stored in a secure web-based database (Redcap) with limited access and ID code, to  
18 which data are transferred directly or by an encrypted USB stick. Patients are assigned unique identification  
19 numbers, which is the only identifier exported from Redcap during data analysis. Data are stored until  
20 December 31, 2027, after which paper material is shredded, data files are deleted and the Redcap database  
21 is no longer accessible. The principal investigator has access to all trial data. Data can be accessed upon  
22 request to the corresponding author after reports related to the Ph.D. project are published. No data  
23 monitoring committee is established.  
24  
25  
26

#### 27 **DISCUSSION**

28  
29 This study will investigate the effectiveness of a systematic institutional strategy incorporating  
30 individualized patient education and testing about cardiovascular risk factors, PA and a healthy diet lifestyle  
31 early after SCI diagnosis during primary rehabilitation, compared to a historical control group. Our findings  
32 will be discussed in light of recent studies suggesting that an interdisciplinary multimodal approach in  
33 prevention of cardiovascular risks among people with SCI with a focus on diet, PA and behavioral  
34 interventions is beneficial [23] [65] [66] [13 25] [14]. Crucial components of the intervention are autonomy  
35 in relation to decision-making and support and follow up from health care professionals and mentors with  
36 SCI. A qualitative meta-synthesis concluded that timely information about PA and its benefits in relation to  
37 SCI and behavioral interventions using goal setting and motivational feedback through physical tests might  
38 be important patient-activating tools [27]. This is consistent with a recent systematic review by Greaves et  
39 al. [26], who also strongly recommended that interventions in the clinical setting contain both group  
40 sessions and individual sessions as well as interdisciplinary interventions that focus on maintaining PA and  
41 healthy diet [26]. These elements are incorporated into the intervention investigated in this study.  
42  
43  
44  
45  
46

47 Several of the outcome measures used to evaluate the intervention are components of the intervention, as  
48 recommended in the clinical guideline for identification and management of cardiometabolic risk after SCI  
49 [2]. Outcome measures also serve as individual motivational tools. The primary outcome measure is  
50 VO<sub>2</sub>peak, for which a significant positive relationship exists with some cardiometabolic markers in people  
51 with SCI, such as lipid profiles and fasting insulin levels [61]. Consequently, physical activity that increases  
52 physical capacity may also reduce the risk of cardiovascular disease [67]. Physical capacity measured as  
53 VO<sub>2</sub>peak is positively associated with functional independence [68], less physical strain during activities of  
54 daily living [69] and life satisfaction [70] among people with SCI, although other measures of physical  
55 capacity have an important and, in some cases, stronger impact on functional independence [68].  
56  
57  
58  
59  
60

1  
2  
3  
4 Among people with SCI, several test protocols have been used for assessing VO<sub>2</sub>peak [36]. In this study,  
5 four exercise protocols make VO<sub>2</sub>peak testing feasible for clinical physiotherapists who, although trained in  
6 using the testing equipment, are inexperienced in determining the appropriate workload during VO<sub>2</sub>peak  
7 testing, which is difficult due to the complexity of a SCI. If predefined criteria for VO<sub>2</sub>peak are not reached,  
8 a more suitable protocol is selected. The protocol and equipment used in the study are identical at  
9 admission and discharge. If a patient's neurological and functional level has improved to the point where a  
10 different protocol and equipment will more accurately measure VO<sub>2</sub>peak, an additional test at discharge  
11 will be performed on a separate day. Data from both tests will be evaluated and the new protocol will be  
12 repeated at follow up 6 months after discharge. This approach to testing VO<sub>2</sub>peak in a clinical setting has,  
13 to the best of our knowledge, not been described previously  
14  
15  
16

17  
18 Secondary outcome measures include PA. Objective PA will be measured by the Actiheart accelerometer,  
19 which has previously been used for wheelchair users with SCI in laboratory and outpatient settings [47]. In  
20 this study, it will be used in an inpatient setting and among people with SCI and some ambulatory function,  
21 which has not been previously described. As a measure of self-reported PA, a validated Danish version of  
22 the Leisure Time Physical Activity Questionnaire for people with Spinal Cord Injury will be used. This version  
23 has been adapted to a Danish context in close collaboration with the developers of the original  
24 questionnaire; PA-related active transportation, such as hand biking or wheeling to work or school, as well  
25 as active physiotherapy exercises are included, as both are common PA for people with SCI in Denmark.  
26  
27  
28

29 The primary study is possible due to the average length of stay during initial rehabilitation at CSCI, which is  
30 85 and 86 days, respectively, for people with incomplete tetra- and paraplegia and 110 and 123 days,  
31 respectively, for people with complete tetra- and paraplegia (Fin Biering-Sørensen: Data from Clinic for  
32 Spinal Cord Injuries, Denmark, 2014). The study is highly dependent on adherence by interdisciplinary  
33 health care professionals and patients to the new intervention. Health care professionals' adherence to the  
34 intervention is both supported and measured by a process inspired by a prospective effect and process  
35 evaluation for complex trials, in which at least 75% must agree that a specific element of strategic patient  
36 education has become a part of routine clinical practice before it is considered implemented [71]. This  
37 evaluation is repeated every 6-8 weeks throughout the intervention period. Similarly, perceived barriers to  
38 implementation are also evaluated every 6-8 weeks throughout the intervention period. Interdisciplinary  
39 coordination meetings occurring three times weekly facilitate the implementation of all interventions.  
40  
41  
42  
43

44 Patient adherence may be challenging; in one report, patients missed an average of 2.5 hours weekly of  
45 rehabilitation [72]. Patient adherence to the intervention is described at discharge by the patient, who will  
46 document participation in targeted education elements using a checklist. However, a 2016 study found that  
47 the most important factor facilitating participation in clinical studies was the possibility of learning more  
48 about SCI and health, which is a clear potential in the intervention study [73]. A review by Van Wyk et al.  
49 emphasizes that patient education is an important part of the interdisciplinary rehabilitation of people with  
50 SCI and recommend an individualized approach and the use of different settings in which the patient can  
51 receive the education [29].  
52  
53  
54

#### 55 **Author Contributions**

56  
57 Nicolaj Jersild Holm has been primarily responsible for writing the protocol. Tom Møller (head supervisor),  
58 Fin Biering-Sørensen and Lone Schou (co-supervisors) have all contributed to the development of the  
59  
60

1  
2  
3  
4 protocol and study design, as well as feedback, supervision and contributions to the text writing. Lis  
5 Adamsen has read and commented on several of the protocol drafts and contributed ideas for ensuring  
6 adherence of participants during the intervention. Line Dalsgaard has, in particular, contributed critical  
7 insights into the clinical setting and workflows involved in the project and the initial development and  
8 writing of the protocol. All authors approved the final version of the manuscript.  
9  
10

### 11 **Funding statement**

12  
13 This work was supported by a research program, "Centre for Integrated Rehabilitation of Cancer Patients  
14 (CIRE) - Neuro/Psychology", conducted collaboratively by the University Hospitals Centre for Health Care  
15 Research, University Hospital Copenhagen, Rigshospitalet, University College Copenhagen, Department of  
16 Nursing and Nutrition, and the NeuroScience Centre, Rigshospitalet.  
17  
18

### 19 **Competing interest statement**

20  
21 The authors have no conflicts of interest.  
22  
23

### 24 **REFERENCES**

- 25 1. Biering-Sorensen F. Rygmarvsskade-den moderne behandling. *Ugeskrift for Læger* 2001;**163**:2766-69.
- 26 2. Nash MS, Groah SL, Gater DR, Jr., et al. Identification and management of cardiometabolic risk after  
27 spinal cord injury: clinical practice guideline for health care providers. *Top Spinal Cord Inj Rehabil*  
28 2018;**24**:379-423. doi: 10.1310/sci2404-379
- 29 3. Møller T, Moser C, Adamsen L, et al. Early warning and prevention of pneumonia in acute leukemia by  
30 patient education, spirometry, and positive expiratory pressure: a randomized controlled trial. *Am J*  
31 *Hematol* 2016;**91**:271-6.
- 32 4. Moller T, Borregaard N, Tvede M, et al. Patient education: a strategy for prevention of infections caused  
33 by permanent central venous catheters in patients with haematological malignancies: a  
34 randomized clinical trial. *J Hosp Infect* 2005;**61**:330-41.
- 35 5. Rajan S, McNeely MJ, Warms C, et al. Clinical assessment and management of obesity in individuals with  
36 spinal cord injury: a review. *J Spinal Cord Med* 2008;**31**:361-72.
- 37 6. Wahman K, Nash MS, Lewis JE, et al. Cardiovascular disease risk and the need for prevention after  
38 paraplegia determined by conventional multifactorial risk models: the Stockholm spinal cord injury  
39 study. *J Rehabil Med* 2011;**43**:237-42. doi: 10.2340/16501977-0658
- 40 7. Libin A, Tinsley EA, Nash MS, et al. Cardiometabolic risk clustering in spinal cord injury: results of  
41 exploratory factor analysis. *Top Spinal Cord Inj Rehabil* 2013;**19**:183-94. doi: 10.1310/sci1903-183
- 42 8. Nash MS, Tractenberg RE, Mendez AJ, et al. Cardiometabolic syndrome in people with spinal cord  
43 injury/disease: guideline-derived and nonguideline risk components in a pooled sample. *Arch Phys*  
44 *Med Rehabil* 2016;**97**:1696-705. doi: 10.1016/j.apmr.2016.07.002
- 45 9. Felleiter P, Krebs J, Haeberli Y, et al. Post-traumatic changes in energy expenditure and body composition  
46 in patients with acute spinal cord injury. *J Rehabil Med* 2017;**49**:579-84. doi: 10.2340/16501977-  
47 2244
- 48 10. de Groot S, Post MW, Postma K, et al. Prospective analysis of body mass index during and up to 5 years  
49 after discharge from inpatient spinal cord injury rehabilitation. *J Rehabil Med* 2010;**42**:922-8.
- 50 11. Stenson KW, Deutsch A, Heinemann AW, et al. Obesity and inpatient rehabilitation outcomes for  
51 patients with a traumatic spinal cord injury. *Arch Phys Med Rehabil* 2011;**92**:384-90. doi:  
52 10.1016/j.apmr.2010.07.235
- 53 12. Salem R, Bamer AM, Alschuler KN, et al. Obesity and symptoms and quality of life indicators of  
54 individuals with disabilities. *Disabil Health J* 2014;**7**:124-30. doi: 10.1016/j.dhjo.2013.10.003  
55  
56  
57  
58  
59  
60

13. Chen Y, Henson S, Jackson AB, et al. Obesity intervention in persons with spinal cord injury. *Spinal Cord* 2006;**44**:82-91. doi: 10.1038/sj.sc.3101818
14. Nash MS, Kressler J. Model programs to address obesity and cardiometabolic disease: interventions for suboptimal nutrition and sedentary lifestyles. *Arch Phys Med Rehabil* 2016;**97**:S238-46. doi: 10.1016/j.apmr.2016.05.026
15. Szlachcic Y, Adkins RH, Adal T, et al. The effect of dietary intervention on lipid profiles in individuals with spinal cord injury. *J Spinal Cord Med* 2001;**24**:26-9. doi: 10.1080/10790268.2001.11753551
16. Wong S, van Middendorp J, Belci M, et al. Knowledge, attitudes and practices of medical staff towards obesity management in patients with spinal cord injuries: an International survey of four western European countries. *Spinal Cord* 2015;**53**:24-31. doi: 10.1038/sc.2014.168
17. Locatelli SM, Gerber BS, Goldstein B, et al. Health care provider practices, barriers, and facilitators for weight management for individuals with spinal cord injuries and disorders. *Top Spinal Cord Inj Rehabil* 2014;**20**:329-37. doi: 10.1310/sci2004-329
18. Fysisk aktivitet-håndbog om forebyggelse og behandling. Copenhagen: Sundhedsstyrelsen 2011.
19. Hicks AL, Martin Ginis KA, Pelletier CA, et al. The effects of exercise training on physical capacity, strength, body composition and functional performance among adults with spinal cord injury: a systematic review. *Spinal Cord* 2011;**49**:1103-27. doi: 10.1038/sc.2011.62
20. van der Scheer JW, Martin Ginis KA, Ditor DS, et al. Effects of exercise on fitness and health of adults with spinal cord injury: a systematic review. *Neurology* 2017;**89**:736-45. doi: 10.1212/wnl.0000000000004224
21. Martin Ginis KA, van der Scheer JW, Latimer-Cheung AE, et al. Evidence-based scientific exercise guidelines for adults with spinal cord injury: an update and a new guideline. *Spinal Cord* 2017 doi: 10.1038/s41393-017-0017-3
22. Rezende LS, Lima MB, Salvador EP. Interventions for promoting physical activity among individuals with spinal cord injury: a systematic review. *J Phys Act Health* 2018;**15**:1-6. doi: 10.1123/jpah.2018-0034
23. Nash MS, Cowan RE, Kressler J. Evidence-based and heuristic approaches for customization of care in cardiometabolic syndrome after spinal cord injury. *J Spinal Cord Med* 2012;**35**:278-92. doi: 10.1179/2045772312y.0000000034
24. Ginis KA, Arbour-Nicitopoulos KP, Latimer AE, et al. Leisure time physical activity in a population-based sample of people with spinal cord injury part II: activity types, intensities, and durations. *Arch Phys Med Rehabil* 2010;**91**:729-33. doi: 10.1016/j.apmr.2009.12.028
25. Nooijen CF, Post MW, Spooren AL, et al. Exercise self-efficacy and the relation with physical behavior and physical capacity in wheelchair-dependent persons with subacute spinal cord injury. *J Neuroeng Rehabil* 2015;**12**:103. doi: 10.1186/s12984-015-0099-0
26. Greaves CJ, Sheppard KE, Abraham C, et al. Systematic review of reviews of intervention components associated with increased effectiveness in dietary and physical activity interventions. *BMC Public Health* 2011;**11**:119. doi: 10.1186/1471-2458-11-119
27. Williams TL, Ma JK, Martin Ginis KA. Participant experiences and perceptions of physical activity-enhancing interventions for people with physical impairments and mobility limitations: a meta-synthesis of qualitative research evidence. *Health Psychol Rev* 2017;**11**:179-96. doi: 10.1080/17437199.2017.1299027
28. Nooijen CF, Stam HJ, Bergen MP, et al. A behavioural intervention increases physical activity in people with subacute spinal cord injury: a randomised trial. *J Physiother* 2016;**62**:35-41. doi: 10.1016/j.jphys.2015.11.003
29. Nooijen CF, Stam HJ, Sluis T, et al. A behavioral intervention promoting physical activity in people with subacute spinal cord injury: secondary effects on health, social participation and quality of life. *Clin Rehabil* 2017;**31**:772-80. doi: 10.1177/0269215516657581
30. Chan AW, Tetzlaff JM, Altman DG, et al. SPIRIT 2013 statement: defining standard protocol items for clinical trials. *Ann Intern Med* 2013;**158**:200-7. doi: 10.7326/0003-4819-158-3-201302050-00583



1  
2  
3  
4  
5  
6  
7  
8  
9  
10  
11  
12  
13  
14  
15  
16  
17  
18  
19  
20  
21  
22  
23  
24  
25  
26  
27  
28  
29  
30  
31  
32  
33  
34  
35  
36  
37  
38  
39  
40  
41  
42  
43  
44  
45  
46  
47  
48  
49  
50  
51  
52  
53  
54  
55  
56  
57  
58  
59  
60

31. Krueger R, Casey M. Focus Groups: A Practical Guide for Applied Research. Newbury Park, California: SAGE Publications 2000.
32. Glaser B, Strauss A. The Discovery of Grounded Theory: Strategies for Qualitative Research. New York: Aldine 1980.
33. Møller T. Individualized supervised patient education: a key role in reinforcement of infection protection and outpatient management of acute leukemia (dissertation). University of Copenhagen, 2011.
34. van Wyk K, Backwell A, Townson A. A narrative literature review to direct spinal cord injury patient education programming. *Top Spinal Cord Inj Rehabil* 2015;**21**:49-60. doi: 10.1310/sci2101-49
35. Lynch J, Cahalan R. The impact of spinal cord injury on the quality of life of primary family caregivers: a literature review. *Spinal Cord* 2017;**55** doi: 10.1038/sc.2017.56
36. Goosey-Tolfrey VL, Paulson TA, Tolfrey K, et al. Prediction of peak oxygen uptake from differentiated ratings of perceived exertion during wheelchair propulsion in trained wheelchair sportspersons. *Eur J Appl Physiol* 2014;**114**:1251-8. doi: 10.1007/s00421-014-2850-9
37. Latimer-Cheung AE, Arbour-Nicitopoulos KP, Brawley LR, et al. Developing physical activity interventions for adults with spinal cord injury. Part 2: motivational counseling and peer-mediated interventions for people intending to be active. *Rehabil Psychol* 2013;**58**:307-15. doi: 10.1037/a0032816
38. Stacey D, Legare F, Lewis K, et al. Decision aids for people facing health treatment or screening decisions. *Cochrane Database Syst Rev* 2017;**4**:Cd001431. doi: 10.1002/14651858.CD001431.pub5
39. Eerden S, Dekker R, Hettinga FJ. Maximal and submaximal aerobic tests for wheelchair-dependent persons with spinal cord injury: a systematic review to summarize and identify useful applications for clinical rehabilitation. *Disabil Rehabil* 2017:1-25. doi: 10.1080/09638288.2017.1287623
40. Billinger SA, Tseng BY, Kluding PM. Modified total-body recumbent stepper exercise test for assessing peak oxygen consumption in people with chronic stroke. *Phys Ther* 2008;**88**:1188-95. doi: 10.2522/ptj.20080072
41. Billinger SA, Loudon JK, Gajewski BJ. Validity of a total body recumbent stepper exercise test to assess cardiorespiratory fitness. *J Strength Cond Res* 2008;**22**:1556-62. doi: 10.1519/JSC.0b013e3181739dd7
42. DiPiro ND, Embry AE, Fritz SL, et al. Effects of aerobic exercise training on fitness and walking-related outcomes in ambulatory individuals with chronic incomplete spinal cord injury. *Spinal Cord* 2016;**54**:675-81. doi: 10.1038/sc.2015.212
43. Nightingale TE, Walhin JP, Thompson D, et al. Predicting physical activity energy expenditure in wheelchair users with a multisensor device. *BMJ Open Sport Exerc Med* 2015;**1** doi: 10.1136/bmjsem-2015-000008
44. Brage S, Brage N, Franks PW, et al. Branched equation modeling of simultaneous accelerometry and heart rate monitoring improves estimate of directly measured physical activity energy expenditure. *J Appl Physiol (1985)* 2004;**96**:343-51. doi: 10.1152/jappphysiol.00703.2003
45. Compher C, Frankenfield D, Keim N, et al. Best practice methods to apply to measurement of resting metabolic rate in adults: a systematic review. *J Am Diet Assoc* 2006;**106**:881-903. doi: 10.1016/j.jada.2006.02.009
46. Fullmer S, Benson-Davies S, Earthman CP, et al. Evidence analysis library review of best practices for performing indirect calorimetry in healthy and non-critically ill individuals. *J Acad Nutr Diet* 2015;**115**:1417-46.e2. doi: 10.1016/j.jand.2015.04.003
47. Nightingale TE, Rouse PC, Thompson D, et al. Measurement of physical activity and energy expenditure in wheelchair users: methods, considerations and future directions. *Sports Med Open* 2017;**3**:10. doi: 10.1186/s40798-017-0077-0
48. Silveira SL, Ledoux TA, Robinson-Whelen S, et al. Methods for classifying obesity in spinal cord injury: a review. *Spinal Cord* 2017;**55** doi: 10.1038/sc.2017.79
49. Piepoli MF, Hoes AW, Agewall S, et al. 2016 European guidelines on cardiovascular disease prevention in clinical practice: The Sixth Joint Task Force of the European Society of Cardiology and other

- 1  
2  
3  
4 societies on cardiovascular disease prevention in clinical practice (constituted by representatives of  
5 10 societies and by invited experts) developed with the special contribution of the European  
6 Association for Cardiovascular Prevention & Rehabilitation (EACPR). *Eur J Prev Cardiol* 2016;**23**:Np1-  
7 np96. doi: 10.1177/2047487316653709
- 8  
9 50. Bauman WA, Biering-Sorensen F, Krassioukov A. The international spinal cord injury endocrine and  
10 metabolic function basic data set. *Spinal Cord* 2011;**49**:1068-72. doi: 10.1038/sc.2011.51
- 11 51. Bauman WA, Wecht JM, Biering-Sorensen F. International spinal cord injury endocrine and metabolic  
12 extended data set. *Spinal Cord* 2017;**55**:466-77. doi: 10.1038/sc.2016.164
- 13 52. Catz A, Itzkovich M, Tesio L, et al. A multicenter international study on the Spinal Cord Independence  
14 Measure, version III: Rasch psychometric validation. *Spinal Cord* 2007;**45**:275-91. doi:  
15 10.1038/sj.sc.3101960
- 16 53. Itzkovich M, Gelernter I, Biering-Sorensen F, et al. The Spinal Cord Independence Measure (SCIM)  
17 version III: reliability and validity in a multi-center international study. *Disabil Rehabil*  
18 2007;**29**:1926-33. doi: 10.1080/09638280601046302
- 19 54. Anderson KD, Acuff ME, Arp BG, et al. United States (US) multi-center study to assess the validity and  
20 reliability of the Spinal Cord Independence Measure (SCIM III). *Spinal Cord* 2011;**49**:880-5. doi:  
21 10.1038/sc.2011.20
- 22 55. Fekete C, Eriks-Hoogland I, Baumberger M, et al. Development and validation of a self-report version of  
23 the Spinal Cord Independence Measure (SCIM III). *Spinal Cord* 2013;**51**:40-7. doi:  
24 10.1038/sc.2012.87
- 25 56. Kirshblum S, Waring W, 3rd. Updates for the International Standards for Neurological Classification of  
26 Spinal Cord Injury. *Phys Med Rehabil Clin N Am* 2014;**25**:505-17, vii. doi: 10.1016/j.pmr.2014.04.001
- 27 57. Kirshblum SC, Burns SP, Biering-Sorensen F, et al. International standards for neurological classification  
28 of spinal cord injury (revised 2011). *J Spinal Cord Med* 2011;**34**:535-46. doi:  
29 10.1179/204577211x13207446293695
- 30 58. Poritz JMP, Mignogna J, Christie AJ, et al. The Patient Health Questionnaire depression screener in  
31 spinal cord injury. *J Spinal Cord Med* 2017;1-7. doi: 10.1080/10790268.2017.1294301
- 32 59. Charlifue S, Post MW, Biering-Sorensen F, et al. International spinal cord injury quality of life basic data  
33 set. *Spinal Cord* 2012;**50**:672-5. doi: 10.1038/sc.2012.27
- 34 60. Post MW, Adriaansen JJ, Charlifue S, et al. Good validity of the international spinal cord injury quality of  
35 life basic data set. *Spinal Cord* 2016;**54**:314-8. doi: 10.1038/sc.2015.99
- 36 61. Martin Ginis KA, Jorgensen S, Stapleton J. Exercise and sport for persons with spinal cord injury. *Pm r*  
37 2012;**4**:894-900. doi: 10.1016/j.pmrj.2012.08.006
- 38 62. Kroll T, Kehn M, Ho PS, et al. The SCI Exercise Self-Efficacy Scale (ESES): development and psychometric  
39 properties. *Int J Behav Nutr Phys Act* 2007;**4**:34. doi: 10.1186/1479-5868-4-34
- 40 63. Matthiessen J, Andersen LF, Barbieri HE, et al. The Nordic Monitoring System 2011–2014 status and  
41 development of diet, physical activity, smoking, alcohol and overweight. TemaNord, 2016.
- 42 64. Mathiessen J, Ander L, Barbieri H, et al. The Nordic monitoring of diet, physical activity, smoking,  
43 alcohol and overweight: 2011–2014. *European Journal of Nutrition & Food Safety* 2017;**7**:128-30.
- 44 65. Gater DR, Jr. Obesity after spinal cord injury. *Phys Med Rehabil Clin N Am* 2007;**18**:333-51, vii. doi:  
45 10.1016/j.pmr.2007.03.004
- 46 66. Liusuwan RA, Widman LM, Abresch RT, et al. Behavioral intervention, exercise, and nutrition education  
47 to improve health and fitness (BENEFit) in adolescents with mobility impairment due to spinal cord  
48 dysfunction. *J Spinal Cord Med* 2007;**30** Suppl 1:S119-26.
- 49 67. de Groot S, Dallmeijer AJ, Post MW, et al. The longitudinal relationship between lipid profile and  
50 physical capacity in persons with a recent spinal cord injury. *Spinal Cord* 2008;**46**:344-51. doi:  
51 10.1038/sj.sc.3102147
- 52 68. Haisma JA, Post MW, van der Woude LH, et al. Functional independence and health-related functional  
53 status following spinal cord injury: a prospective study of the association with physical capacity. *J*  
54 *Rehabil Med* 2008;**40**:812-8. doi: 10.2340/16501977-0258
- 55  
56  
57  
58  
59  
60



- 1  
2  
3  
4 69. Janssen TW, van Oers CA, Veeger HE, et al. Relationship between physical strain during standardised  
5 ADL tasks and physical capacity in men with spinal cord injuries. *Paraplegia* 1994;**32**:844-59. doi:  
6 10.1038/sc.1994.131  
7  
8 70. van Koppenhagen CF, Post M, de Groot S, et al. Longitudinal relationship between wheelchair exercise  
9 capacity and life satisfaction in patients with spinal cord injury: a cohort study in the Netherlands. *J*  
10 *Spinal Cord Med* 2014;**37**:328-37. doi: 10.1179/2045772313y.0000000167  
11  
12 71. de Groot S, Bevers G, Post MW, et al. Effect and process evaluation of implementing standardized tests  
13 to monitor patients in spinal cord injury rehabilitation. *Disabil Rehabil* 2010;**32**:588-97. doi:  
14 10.3109/09638280903174414  
15  
16 72. Zanca JM, Dijkers MP, Hammond FM, et al. Pain and its impact on inpatient rehabilitation for acute  
17 traumatic spinal cord injury: analysis of observational data collected in the SCIRehab study. *Arch*  
18 *Phys Med Rehabil* 2013;**94**:S137-44. doi: 10.1016/j.apmr.2012.10.035  
19  
20 73. Anderson KD, Cowan RE, Horsewell J. Facilitators and barriers to spinal cord injury clinical trial  
21 participation: multi-national perspective of people living with spinal cord injury. *J Neurotrauma*  
22 2016;**33**:493-9. doi: 10.1089/neu.2015.4064  
23

24 **Figure 1.** Timeline for all sub studies and used outcome measures. Figure A and B illustrates the prospective  
25 historic control study and the intervention study respectively.  
26

27 **Figure 2.** Timeline illustrated on the pocket card for systematic targeted approaches during primary  
28 rehabilitation within 2, 4 and 6 weeks after admission (AA) and during the last 4 and 2 weeks before  
29 discharge (BD) and at follow up 6 months after discharge. **PA:** Physical activity; **VO2peak:** peak oxygen  
30 uptake; **BMI:** Body Mass Index; **DXA:** Dual- energy X-ray Absorptiometry.  
31  
32  
33  
34  
35  
36  
37  
38  
39  
40  
41  
42  
43  
44  
45  
46  
47  
48  
49  
50  
51  
52  
53  
54  
55  
56  
57  
58  
59  
60

**Fig. A**



**Fig. B**



**VCR:** Center for Spinal Cord Injury, Western Denmark ; **CSCI:** Clinic for Spinal Cord Injuries, Eastern Denmark; **BMI:** Body Mass Index; **SCIM:** Spinal Cord Injury Independence Measure; **ISNCSCI:** International Standards for Neurological Classification of Spinal Cord Injury; **PHQ-2:** Patient Health Questionnaire- 2; **QOL SCI:** International SCI Quality of Life Basic Data Set; **LTPAQ-SCI:** Leisure Time Physical Activity Questionnaire for people With Spinal Cord Injury; **ESES:** Exercise Self Efficacy Scale ;**AH Actiheart (accelerometer); VO2peak:**peak oxygen uptake ;**DXA:** Dual- energy X-ray Absorptiometry **MP:** Metabolic profile;; **NORMON:** Nordic monitoring of diet, physical activity and overweight; **SDM-Q-9:** 9-item Shared Decision Making Questionnaire

1  
2  
3  
4  
5  
6  
7  
8  
9  
10  
11  
12  
13  
14  
15  
16  
17  
18  
19  
20  
21  
22  
23  
24  
25  
26  
27  
28  
29  
30  
31  
32  
33  
34  
35  
36  
37  
38  
39  
40  
41  
42  
43  
44  
45  
46  
47



## Appendix: Strategic interventions

| Strategic interventions                                            | Scope/ Content                                                                                                                                                                                                                                                                                         | Procedure                                                                                                                                                                                                                                                        | Health care staff                                                                                                             | Process                                                                                                            |
|--------------------------------------------------------------------|--------------------------------------------------------------------------------------------------------------------------------------------------------------------------------------------------------------------------------------------------------------------------------------------------------|------------------------------------------------------------------------------------------------------------------------------------------------------------------------------------------------------------------------------------------------------------------|-------------------------------------------------------------------------------------------------------------------------------|--------------------------------------------------------------------------------------------------------------------|
| Pre- education of all health care professionals and peers with SCI | To prepare a uniform and systematic approach and clarifying the roles of each profession in relation to the targeted patient education, an evidence-based pre-education of the interdisciplinary health care personnel and peers with SCI is performed about cardiovascular risk, PA and healthy diet. | Pre-education is performed by stakeholders, as one session just before the intervention start-up. Pocket cards with evidence based basic recommendations related to PA and healthy diet in people with SCI are provided to all professions and peers with SCI.   | All health care professionals at the clinic, and all peers from the peer corps.                                               | The pre-education is performed multiple times until all health care professionals have attended the pre-education. |
| Patient education + session about diet and PA                      | To Inform the patients about SCI in general, including specific evidence based information about cardiovascular risk and overweight as a mandatory part, facilitating patients discussing healthy diet and PA                                                                                          | Patient education is performed face- to-face as a group session. Afterwards the patients discuss PA and healthy diet. Interdisciplinary health care professionals facilitates the session from evidence based information in the patient decision aids material. | Patient education: Medical doctors.<br><br>Session about diet and PA: Interdisciplinary health care professionals.            | Once                                                                                                               |
| Education of relatives                                             | To inform the relatives about SCI in general, including specific evidence based information about cardiovascular risk and overweight and the benefits of healthy diet and PA as a mandatory element.                                                                                                   | The session last a full day with face-to-face information and discussion about several aspects related to SCI and the role as a relative.                                                                                                                        | Interdisciplinary+ invited relatives to former patients sharing their experiences about being a relative to a person with SCI | Once                                                                                                               |
| Admission meeting                                                  | A group setting where patients and relatives are informed about the scope of the rehabilitation and consequences of a SCI.                                                                                                                                                                             | Information face- to-face about cardiovascular risk and overweight and the benefits of healthy diet and PA is provided                                                                                                                                           | Interdisciplinary team                                                                                                        | Once                                                                                                               |

Information and education in group sessions

|    |                                                                                    |                                                                                                                                                                         |                                                                                                                                                                                                                                                                                                  |                            |                                                                                      |
|----|------------------------------------------------------------------------------------|-------------------------------------------------------------------------------------------------------------------------------------------------------------------------|--------------------------------------------------------------------------------------------------------------------------------------------------------------------------------------------------------------------------------------------------------------------------------------------------|----------------------------|--------------------------------------------------------------------------------------|
| 1  |                                                                                    |                                                                                                                                                                         |                                                                                                                                                                                                                                                                                                  |                            |                                                                                      |
| 2  |                                                                                    |                                                                                                                                                                         |                                                                                                                                                                                                                                                                                                  |                            |                                                                                      |
| 3  |                                                                                    |                                                                                                                                                                         |                                                                                                                                                                                                                                                                                                  |                            |                                                                                      |
| 4  |                                                                                    |                                                                                                                                                                         |                                                                                                                                                                                                                                                                                                  |                            |                                                                                      |
| 5  |                                                                                    |                                                                                                                                                                         |                                                                                                                                                                                                                                                                                                  |                            |                                                                                      |
| 6  |                                                                                    |                                                                                                                                                                         |                                                                                                                                                                                                                                                                                                  |                            |                                                                                      |
| 7  |                                                                                    |                                                                                                                                                                         |                                                                                                                                                                                                                                                                                                  |                            |                                                                                      |
| 8  |                                                                                    |                                                                                                                                                                         |                                                                                                                                                                                                                                                                                                  |                            |                                                                                      |
| 9  |                                                                                    |                                                                                                                                                                         |                                                                                                                                                                                                                                                                                                  |                            |                                                                                      |
| 10 |                                                                                    |                                                                                                                                                                         |                                                                                                                                                                                                                                                                                                  |                            |                                                                                      |
| 11 |                                                                                    |                                                                                                                                                                         |                                                                                                                                                                                                                                                                                                  |                            |                                                                                      |
| 12 |                                                                                    |                                                                                                                                                                         |                                                                                                                                                                                                                                                                                                  |                            |                                                                                      |
| 13 |                                                                                    |                                                                                                                                                                         |                                                                                                                                                                                                                                                                                                  |                            |                                                                                      |
| 14 |                                                                                    |                                                                                                                                                                         |                                                                                                                                                                                                                                                                                                  |                            |                                                                                      |
| 15 |                                                                                    |                                                                                                                                                                         |                                                                                                                                                                                                                                                                                                  |                            |                                                                                      |
| 16 |                                                                                    |                                                                                                                                                                         |                                                                                                                                                                                                                                                                                                  |                            |                                                                                      |
| 17 |                                                                                    |                                                                                                                                                                         |                                                                                                                                                                                                                                                                                                  |                            |                                                                                      |
| 18 |                                                                                    |                                                                                                                                                                         |                                                                                                                                                                                                                                                                                                  |                            |                                                                                      |
| 19 |                                                                                    |                                                                                                                                                                         |                                                                                                                                                                                                                                                                                                  |                            |                                                                                      |
| 20 |                                                                                    |                                                                                                                                                                         |                                                                                                                                                                                                                                                                                                  |                            |                                                                                      |
| 21 |                                                                                    |                                                                                                                                                                         |                                                                                                                                                                                                                                                                                                  |                            |                                                                                      |
| 22 |                                                                                    |                                                                                                                                                                         |                                                                                                                                                                                                                                                                                                  |                            |                                                                                      |
| 23 |                                                                                    |                                                                                                                                                                         |                                                                                                                                                                                                                                                                                                  |                            |                                                                                      |
| 24 |                                                                                    |                                                                                                                                                                         |                                                                                                                                                                                                                                                                                                  |                            |                                                                                      |
| 25 |                                                                                    |                                                                                                                                                                         |                                                                                                                                                                                                                                                                                                  |                            |                                                                                      |
| 26 |                                                                                    |                                                                                                                                                                         |                                                                                                                                                                                                                                                                                                  |                            |                                                                                      |
| 27 |                                                                                    |                                                                                                                                                                         |                                                                                                                                                                                                                                                                                                  |                            |                                                                                      |
| 28 |                                                                                    |                                                                                                                                                                         |                                                                                                                                                                                                                                                                                                  |                            |                                                                                      |
| 29 |                                                                                    |                                                                                                                                                                         |                                                                                                                                                                                                                                                                                                  |                            |                                                                                      |
| 30 |                                                                                    |                                                                                                                                                                         |                                                                                                                                                                                                                                                                                                  |                            |                                                                                      |
| 31 | <b>Motivational physiologic<br/>outcome measures and<br/>face-to-face feedback</b> |                                                                                                                                                                         |                                                                                                                                                                                                                                                                                                  |                            |                                                                                      |
| 32 |                                                                                    |                                                                                                                                                                         |                                                                                                                                                                                                                                                                                                  |                            |                                                                                      |
| 33 |                                                                                    |                                                                                                                                                                         |                                                                                                                                                                                                                                                                                                  |                            |                                                                                      |
| 34 |                                                                                    |                                                                                                                                                                         |                                                                                                                                                                                                                                                                                                  |                            |                                                                                      |
| 35 |                                                                                    |                                                                                                                                                                         |                                                                                                                                                                                                                                                                                                  |                            |                                                                                      |
| 36 |                                                                                    |                                                                                                                                                                         |                                                                                                                                                                                                                                                                                                  |                            |                                                                                      |
| 37 |                                                                                    |                                                                                                                                                                         |                                                                                                                                                                                                                                                                                                  |                            |                                                                                      |
| 38 |                                                                                    |                                                                                                                                                                         |                                                                                                                                                                                                                                                                                                  |                            |                                                                                      |
| 39 |                                                                                    |                                                                                                                                                                         |                                                                                                                                                                                                                                                                                                  |                            |                                                                                      |
| 40 |                                                                                    |                                                                                                                                                                         |                                                                                                                                                                                                                                                                                                  |                            |                                                                                      |
| 41 |                                                                                    |                                                                                                                                                                         |                                                                                                                                                                                                                                                                                                  |                            |                                                                                      |
| 42 |                                                                                    |                                                                                                                                                                         |                                                                                                                                                                                                                                                                                                  |                            |                                                                                      |
| 43 |                                                                                    |                                                                                                                                                                         |                                                                                                                                                                                                                                                                                                  |                            |                                                                                      |
| 44 |                                                                                    |                                                                                                                                                                         |                                                                                                                                                                                                                                                                                                  |                            |                                                                                      |
| 45 |                                                                                    |                                                                                                                                                                         |                                                                                                                                                                                                                                                                                                  |                            |                                                                                      |
| 46 |                                                                                    |                                                                                                                                                                         |                                                                                                                                                                                                                                                                                                  |                            |                                                                                      |
|    | Discharge meeting                                                                  | A group setting where the patient and relatives are informed about the discharge in general, and how to manage consequences of the SCI in a new context after discharge | Information face- to-face about how to transfer the achieved knowledge and behaviors related to PA and healthy diet to a new context and information about the risk of low PA and gaining weight after discharge is provided.                                                                    | Interdisciplinary team     | Once                                                                                 |
|    | Diet composition advice                                                            | Recommendations about the diet composition at lunch servings is presented, based on the national nutrition guidelines.                                                  | Servings take place in a dining room. Visual material with diet composition recommendations is available and a plate model for inspiration is presented, with 200-300 gram of vegetables.                                                                                                        | Kitchen staff              | Every day                                                                            |
|    | Exercise intensity education                                                       | Education about evidence based exercise amount and intensity for reducing cardiovascular risk and how to monitor intensity by using ratings of perceived exertion       | The education is delivered by trained physiotherapists during group sessions of wheelchair skills training and cardiovascular exercise sessions.                                                                                                                                                 | Physiotherapist            | Once weekly                                                                          |
|    | BMI                                                                                | BMI is assessed as part of existing routines and the patient is informed about the course of BMI. Serves as motivational tool.                                          | Information is delivered to the patient face to face, in a private setting, with no other agendas. Evidence based actions related to BMI are discussed if relevant. Physiotherapists makes sure that the patient is up to date with total weight of the wheelchair and cushion before assessment | Nurses + Physiotherapists. | BMI and feedback is performed every week throughout the rehabilitation               |
|    | VO2peak                                                                            | VO2peak serves as a marker of physical capacity and the patient is informed about the test result and the course of physical capacity. Serves as motivational tool.     | Information is delivered to the patient face to face, in a private setting, with no other agendas. Evidence based actions related to physical capacity are discussed if relevant.                                                                                                                | Physiotherapists           | Measurement and subsequently feedback at:<br><br>Admission<br>Discharge<br>Follow up |

|                                                                                                                        |                                                                                                                                                                                                                                                     |                                                                                                                                                                                                                                                                 |                              |                                                                                                                      |
|------------------------------------------------------------------------------------------------------------------------|-----------------------------------------------------------------------------------------------------------------------------------------------------------------------------------------------------------------------------------------------------|-----------------------------------------------------------------------------------------------------------------------------------------------------------------------------------------------------------------------------------------------------------------|------------------------------|----------------------------------------------------------------------------------------------------------------------|
| Accelerometry                                                                                                          | Accelerometry serves as a marker of amount and intensity of PA and the patient is informed about the result and the course of PA. Serves as motivational tool.                                                                                      | Information is delivered to the patient face to face, in a private setting, with no other agendas. Evidence based actions related to are discussed if relevant                                                                                                  | Physiotherapists             | Measurement and subsequently feedback at:<br>Admission<br>Discharge<br>Follow up                                     |
| DXA                                                                                                                    | DXA serves as a marker of body composition (percentage lean mass and fat mass) and the patient is informed about the result and the course of body composition. Serves as motivational tool.                                                        | Information is delivered to the patient face to face, in a private setting, with no other agendas. Evidence based actions to change body composition are discussed if relevant                                                                                  | Medical doctors              | Measurement and subsequently feedback at:<br>Admission<br>Follow up                                                  |
| Metabolic profile                                                                                                      | Metabolic profile serves as a biomarker for diabetes and atherosclerotic disease and the patient is informed about the result and the course of measurements. Serves as motivational tool.                                                          | Information is delivered to the patient face to face, in a private setting, with no other agendas. Evidence based actions related to metabolic disease are discussed if relevant                                                                                | Medical doctors              | Measurement and subsequently feedback at:<br>Admission<br>Discharge<br>Follow up                                     |
| Introduction to patient decision aids for diet and PA and a brochure about food, weight and health for people with SCI | A setting in the early rehabilitation phase, where the decision aids and brochure are provided to the patient. The structure and goal of the two decision aids is introduced. The brochure supports the aim and rationale of the two decision aids. | A private setting between the patient and nurse face-to-face with no other agendas. From the time of introduction until the first goal setting meetings about diet and PA, the patient may read the information coupled to the recommendations for diet and PA. | Nurses +<br>Physiotherapists | Once                                                                                                                 |
| Goal setting using patient decision aids for diet and PA                                                               | Consists of two <u>different</u> patient decision aids. They are evidence-based tools describing several options, recommendations and consequences of choices, and creates the basis for the decision process. The aim is                           | The tool consists of written information material. The decision process together with the health care professionals, takes place face to face, in a private setting, with no other agendas. If requested by the                                                 | Interdisciplinary team       | A continuous process until a decision is made by the patient.<br><br>The tools for diet and PA are introduced at the |

**Goalsetting and action planning (lifestyle changes)**

|                                     |                                                                                                                                      |                                                                                                                                                   |                        |                                                                                 |
|-------------------------------------|--------------------------------------------------------------------------------------------------------------------------------------|---------------------------------------------------------------------------------------------------------------------------------------------------|------------------------|---------------------------------------------------------------------------------|
|                                     | to help the patient consider each option in relation to his/her overall life situation and make a choice that fits the patient well. | patient, peers with SCI are accessible, ready to share their own experiences related to PA and diet.                                              |                        | <b>goalsetting meetings</b> approx. 4 and 5 weeks after admission respectively. |
| Goal setting meetings               | A setting with the patient where goals for the rehabilitation are defined including goals related to PA and healthy diet.            | Previous goals are evaluated and new goals are defined for the next 14 days. Asking the patient about goals for PA and healthy diet is mandatory. | Interdisciplinary team | Every 14 days                                                                   |
| Follow up 3 months after discharge. | Follow up in an outpatient setting on the course of BMI and healthy diet.                                                            | The follow-up is a face-to-face interaction based on the patient decision aids for diet                                                           | Nurses                 | Once                                                                            |

Interdisciplinary team: Medical doctor, nurse, physiotherapist, occupational therapist, social worker, psychologist.

SCI: Spinal Cord Injury; PA: Physical Activity; BMI: Body Mass Index; DXA: Dual-energy X-ray Absorptiometry

1  
2  
3  
4  
5  
6  
7  
8  
9  
10  
11  
12  
13  
14  
15  
16  
17  
18  
19  
20  
21  
22  
23  
24  
25  
26  
27  
28  
29  
30  
31  
32  
33  
34  
35  
36  
37  
38  
39  
40  
41  
42  
43  
44  
45  
46



# Reporting checklist for protocol of a clinical trial.

Based on the SPIRIT guidelines.

## Instructions to authors

Complete this checklist by entering the page numbers from your manuscript where readers will find each of the items listed below.

Your article may not currently address all the items on the checklist. Please modify your text to include the missing information. If you are certain that an item does not apply, please write "n/a" and provide a short explanation.

Upload your completed checklist as an extra file when you submit to a journal.

In your methods section, say that you used the SPIRIT reporting guidelines, and cite them as:

Chan A-W, Tetzlaff JM, Altman DG, Laupacis A, Gøtzsche PC, Krleža-Jerić K, Hróbjartsson A, Mann H, Dickersin K, Berlin J, Doré C, Parulekar W, Summerskill W, Groves T, Schulz K, Sox H, Rockhold FW, Rennie D, Moher D. SPIRIT 2013 Statement: Defining standard protocol items for clinical trials. *Ann Intern Med.* 2013;158(3):200-207

|                                             |                     | Reporting Item                                                                                               | Page Number |
|---------------------------------------------|---------------------|--------------------------------------------------------------------------------------------------------------|-------------|
| Title                                       | <a href="#">#1</a>  | Descriptive title identifying the study design, population, interventions, and, if applicable, trial acronym | 1           |
| Trial registration                          | <a href="#">#2a</a> | Trial identifier and registry name. If not yet registered, name of intended registry                         | 3           |
| Trial registration: data set                | <a href="#">#2b</a> | All items from the World Health Organization Trial Registration Data Set                                     | 3           |
| Protocol version                            | <a href="#">#3</a>  | Date and version identifier                                                                                  | 2           |
| Funding                                     | <a href="#">#4</a>  | Sources and types of financial, material, and other support                                                  | 13          |
| Roles and responsibilities: contributorship | <a href="#">#5a</a> | Names, affiliations, and roles of protocol contributors                                                      | 13          |

|    |                      |                     |                                                     |     |
|----|----------------------|---------------------|-----------------------------------------------------|-----|
| 1  | Roles and            | <a href="#">#5b</a> | Name and contact information for the trial          | 13  |
| 2  | responsibilities:    |                     | sponsor                                             |     |
| 3  | sponsor contact      |                     |                                                     |     |
| 4  | information          |                     |                                                     |     |
| 5  |                      |                     |                                                     |     |
| 6  |                      |                     |                                                     |     |
| 7  |                      |                     |                                                     |     |
| 8  | Roles and            | <a href="#">#5c</a> | Role of study sponsor and funders, if any, in       | 13  |
| 9  | responsibilities:    |                     | study design; collection, management, analysis,     |     |
| 10 | sponsor and funder   |                     | and interpretation of data; writing of the report;  |     |
| 11 |                      |                     | and the decision to submit the report for           |     |
| 12 |                      |                     | publication, including whether they will have       |     |
| 13 |                      |                     | ultimate authority over any of these activities     |     |
| 14 |                      |                     |                                                     |     |
| 15 |                      |                     |                                                     |     |
| 16 |                      |                     |                                                     |     |
| 17 | Roles and            | <a href="#">#5d</a> | Composition, roles, and responsibilities of the     | N/A |
| 18 | responsibilities:    |                     | coordinating centre, steering committee, endpoint   |     |
| 19 | committees           |                     | adjudication committee, data management team,       |     |
| 20 |                      |                     | and other individuals or groups overseeing the      |     |
| 21 |                      |                     | trial, if applicable (see Item 21a for data         |     |
| 22 |                      |                     | monitoring committee)                               |     |
| 23 |                      |                     |                                                     |     |
| 24 |                      |                     |                                                     |     |
| 25 |                      |                     |                                                     |     |
| 26 |                      |                     |                                                     |     |
| 27 | Background and       | <a href="#">#6a</a> | Description of research question and justification  | 3   |
| 28 | rationale            |                     | for undertaking the trial, including summary of     |     |
| 29 |                      |                     | relevant studies (published and unpublished)        |     |
| 30 |                      |                     | examining benefits and harms for each               |     |
| 31 |                      |                     | intervention                                        |     |
| 32 |                      |                     |                                                     |     |
| 33 |                      |                     |                                                     |     |
| 34 |                      |                     |                                                     |     |
| 35 |                      |                     |                                                     |     |
| 36 | Background and       | <a href="#">#6b</a> | Explanation for choice of comparators               | 3-4 |
| 37 | rationale: choice of |                     |                                                     |     |
| 38 | comparators          |                     |                                                     |     |
| 39 |                      |                     |                                                     |     |
| 40 |                      |                     |                                                     |     |
| 41 | Objectives           | <a href="#">#7</a>  | Specific objectives or hypotheses                   | 5   |
| 42 |                      |                     |                                                     |     |
| 43 | Trial design         | <a href="#">#8</a>  | Description of trial design including type of trial | 5   |
| 44 |                      |                     | (eg, parallel group, crossover, factorial, single   |     |
| 45 |                      |                     | group), allocation ratio, and framework (eg,        |     |
| 46 |                      |                     | superiority, equivalence, non-inferiority,          |     |
| 47 |                      |                     | exploratory)                                        |     |
| 48 |                      |                     |                                                     |     |
| 49 |                      |                     |                                                     |     |
| 50 |                      |                     |                                                     |     |
| 51 | Study setting        | <a href="#">#9</a>  | Description of study settings (eg, community        | 5   |
| 52 |                      |                     | clinic, academic hospital) and list of countries    |     |
| 53 |                      |                     | where data will be collected. Reference to where    |     |
| 54 |                      |                     | list of study sites can be obtained                 |     |
| 55 |                      |                     |                                                     |     |
| 56 |                      |                     |                                                     |     |
| 57 |                      |                     |                                                     |     |
| 58 |                      |                     |                                                     |     |
| 59 |                      |                     |                                                     |     |
| 60 |                      |                     |                                                     |     |

|    |                                 |                      |                                                                                                                                                                                                                                                                                                                                                                                |                                                                          |
|----|---------------------------------|----------------------|--------------------------------------------------------------------------------------------------------------------------------------------------------------------------------------------------------------------------------------------------------------------------------------------------------------------------------------------------------------------------------|--------------------------------------------------------------------------|
| 1  | Eligibility criteria            | <a href="#">#10</a>  | Inclusion and exclusion criteria for participants. If applicable, eligibility criteria for study centres and individuals who will perform the interventions (eg, surgeons, psychotherapists)                                                                                                                                                                                   | 6                                                                        |
| 2  |                                 |                      |                                                                                                                                                                                                                                                                                                                                                                                |                                                                          |
| 3  |                                 |                      |                                                                                                                                                                                                                                                                                                                                                                                |                                                                          |
| 4  |                                 |                      |                                                                                                                                                                                                                                                                                                                                                                                |                                                                          |
| 5  |                                 |                      |                                                                                                                                                                                                                                                                                                                                                                                |                                                                          |
| 6  |                                 |                      |                                                                                                                                                                                                                                                                                                                                                                                |                                                                          |
| 7  |                                 |                      |                                                                                                                                                                                                                                                                                                                                                                                |                                                                          |
| 8  | Interventions: description      | <a href="#">#11a</a> | Interventions for each group with sufficient detail to allow replication, including how and when they will be administered                                                                                                                                                                                                                                                     | 7-9                                                                      |
| 9  |                                 |                      |                                                                                                                                                                                                                                                                                                                                                                                |                                                                          |
| 10 |                                 |                      |                                                                                                                                                                                                                                                                                                                                                                                |                                                                          |
| 11 |                                 |                      |                                                                                                                                                                                                                                                                                                                                                                                |                                                                          |
| 12 |                                 |                      |                                                                                                                                                                                                                                                                                                                                                                                |                                                                          |
| 13 | Interventions: modifications    | <a href="#">#11b</a> | Criteria for discontinuing or modifying allocated interventions for a given trial participant (eg, drug dose change in response to harms, participant request, or improving / worsening disease)                                                                                                                                                                               | N/A Decisions related to the intervention are made by the clinical staff |
| 14 |                                 |                      |                                                                                                                                                                                                                                                                                                                                                                                |                                                                          |
| 15 |                                 |                      |                                                                                                                                                                                                                                                                                                                                                                                |                                                                          |
| 16 |                                 |                      |                                                                                                                                                                                                                                                                                                                                                                                |                                                                          |
| 17 |                                 |                      |                                                                                                                                                                                                                                                                                                                                                                                |                                                                          |
| 18 |                                 |                      |                                                                                                                                                                                                                                                                                                                                                                                |                                                                          |
| 19 |                                 |                      |                                                                                                                                                                                                                                                                                                                                                                                |                                                                          |
| 20 |                                 |                      |                                                                                                                                                                                                                                                                                                                                                                                |                                                                          |
| 21 | Interventions: adherence        | <a href="#">#11c</a> | Strategies to improve adherence to intervention protocols, and any procedures for monitoring adherence (eg, drug tablet return; laboratory tests)                                                                                                                                                                                                                              | 12-13                                                                    |
| 22 |                                 |                      |                                                                                                                                                                                                                                                                                                                                                                                |                                                                          |
| 23 |                                 |                      |                                                                                                                                                                                                                                                                                                                                                                                |                                                                          |
| 24 |                                 |                      |                                                                                                                                                                                                                                                                                                                                                                                |                                                                          |
| 25 |                                 |                      |                                                                                                                                                                                                                                                                                                                                                                                |                                                                          |
| 26 |                                 |                      |                                                                                                                                                                                                                                                                                                                                                                                |                                                                          |
| 27 |                                 |                      |                                                                                                                                                                                                                                                                                                                                                                                |                                                                          |
| 28 | Interventions: concomitant care | <a href="#">#11d</a> | Relevant concomitant care and interventions that are permitted or prohibited during the trial                                                                                                                                                                                                                                                                                  | 7                                                                        |
| 29 |                                 |                      |                                                                                                                                                                                                                                                                                                                                                                                |                                                                          |
| 30 |                                 |                      |                                                                                                                                                                                                                                                                                                                                                                                |                                                                          |
| 31 |                                 |                      |                                                                                                                                                                                                                                                                                                                                                                                |                                                                          |
| 32 | Outcomes                        | <a href="#">#12</a>  | Primary, secondary, and other outcomes, including the specific measurement variable (eg, systolic blood pressure), analysis metric (eg, change from baseline, final value, time to event), method of aggregation (eg, median, proportion), and time point for each outcome. Explanation of the clinical relevance of chosen efficacy and harm outcomes is strongly recommended | 9                                                                        |
| 33 |                                 |                      |                                                                                                                                                                                                                                                                                                                                                                                |                                                                          |
| 34 |                                 |                      |                                                                                                                                                                                                                                                                                                                                                                                |                                                                          |
| 35 |                                 |                      |                                                                                                                                                                                                                                                                                                                                                                                |                                                                          |
| 36 |                                 |                      |                                                                                                                                                                                                                                                                                                                                                                                |                                                                          |
| 37 |                                 |                      |                                                                                                                                                                                                                                                                                                                                                                                |                                                                          |
| 38 |                                 |                      |                                                                                                                                                                                                                                                                                                                                                                                |                                                                          |
| 39 |                                 |                      |                                                                                                                                                                                                                                                                                                                                                                                |                                                                          |
| 40 |                                 |                      |                                                                                                                                                                                                                                                                                                                                                                                |                                                                          |
| 41 |                                 |                      |                                                                                                                                                                                                                                                                                                                                                                                |                                                                          |
| 42 |                                 |                      |                                                                                                                                                                                                                                                                                                                                                                                |                                                                          |
| 43 |                                 |                      |                                                                                                                                                                                                                                                                                                                                                                                |                                                                          |
| 44 |                                 |                      |                                                                                                                                                                                                                                                                                                                                                                                |                                                                          |
| 45 | Participant timeline            | <a href="#">#13</a>  | Time schedule of enrolment, interventions (including any run-ins and washouts), assessments, and visits for participants. A schematic diagram is highly recommended (see Figure)                                                                                                                                                                                               | 7                                                                        |
| 46 |                                 |                      |                                                                                                                                                                                                                                                                                                                                                                                |                                                                          |
| 47 |                                 |                      |                                                                                                                                                                                                                                                                                                                                                                                |                                                                          |
| 48 |                                 |                      |                                                                                                                                                                                                                                                                                                                                                                                |                                                                          |
| 49 |                                 |                      |                                                                                                                                                                                                                                                                                                                                                                                |                                                                          |
| 50 |                                 |                      |                                                                                                                                                                                                                                                                                                                                                                                |                                                                          |
| 51 |                                 |                      |                                                                                                                                                                                                                                                                                                                                                                                |                                                                          |
| 52 |                                 |                      |                                                                                                                                                                                                                                                                                                                                                                                |                                                                          |
| 53 | Sample size                     | <a href="#">#14</a>  | Estimated number of participants needed to achieve study objectives and how it was determined, including clinical and statistical                                                                                                                                                                                                                                              | 7                                                                        |
| 54 |                                 |                      |                                                                                                                                                                                                                                                                                                                                                                                |                                                                          |
| 55 |                                 |                      |                                                                                                                                                                                                                                                                                                                                                                                |                                                                          |
| 56 |                                 |                      |                                                                                                                                                                                                                                                                                                                                                                                |                                                                          |
| 57 |                                 |                      |                                                                                                                                                                                                                                                                                                                                                                                |                                                                          |
| 58 |                                 |                      |                                                                                                                                                                                                                                                                                                                                                                                |                                                                          |
| 59 |                                 |                      |                                                                                                                                                                                                                                                                                                                                                                                |                                                                          |
| 60 |                                 |                      |                                                                                                                                                                                                                                                                                                                                                                                |                                                                          |

|    |                      |                      |                                                                                     |             |
|----|----------------------|----------------------|-------------------------------------------------------------------------------------|-------------|
| 1  |                      |                      | assumptions supporting any sample size                                              |             |
| 2  |                      |                      | calculations                                                                        |             |
| 3  |                      |                      |                                                                                     |             |
| 4  | Recruitment          | <a href="#">#15</a>  | Strategies for achieving adequate participant enrolment to reach target sample size | 6           |
| 5  |                      |                      |                                                                                     |             |
| 6  |                      |                      |                                                                                     |             |
| 7  |                      |                      |                                                                                     |             |
| 8  | Allocation:          | <a href="#">#16a</a> | Method of generating the allocation sequence                                        | N/A due to  |
| 9  | sequence             |                      | (eg, computer-generated random numbers), and                                        | consecutive |
| 10 | generation           |                      | list of any factors for stratification. To reduce                                   | enrollment  |
| 11 |                      |                      | predictability of a random sequence, details of                                     |             |
| 12 |                      |                      | any planned restriction (eg, blocking) should be                                    |             |
| 13 |                      |                      | provided in a separate document that is                                             |             |
| 14 |                      |                      | unavailable to those who enrol participants or                                      |             |
| 15 |                      |                      | assign interventions                                                                |             |
| 16 |                      |                      |                                                                                     |             |
| 17 |                      |                      |                                                                                     |             |
| 18 |                      |                      |                                                                                     |             |
| 19 |                      |                      |                                                                                     |             |
| 20 | Allocation           | <a href="#">#16b</a> | Mechanism of implementing the allocation                                            | N/A due to  |
| 21 | concealment          |                      | sequence (eg, central telephone; sequentially                                       | consecutive |
| 22 | mechanism            |                      | numbered, opaque, sealed envelopes),                                                | enrollment  |
| 23 |                      |                      | describing any steps to conceal the sequence                                        |             |
| 24 |                      |                      | until interventions are assigned                                                    |             |
| 25 |                      |                      |                                                                                     |             |
| 26 |                      |                      |                                                                                     |             |
| 27 |                      |                      |                                                                                     |             |
| 28 |                      |                      |                                                                                     |             |
| 29 | Allocation:          | <a href="#">#16c</a> | Who will generate the allocation sequence, who                                      | N/A due to  |
| 30 | implementation       |                      | will enrol participants, and who will assign                                        | consecutive |
| 31 |                      |                      | participants to interventions                                                       | enrollment  |
| 32 |                      |                      |                                                                                     |             |
| 33 |                      |                      |                                                                                     |             |
| 34 | Blinding (masking)   | <a href="#">#17a</a> | Who will be blinded after assignment to                                             | N/A due to  |
| 35 |                      |                      | interventions (eg, trial participants, care                                         | consecutive |
| 36 |                      |                      | providers, outcome assessors, data analysts),                                       | enrollment  |
| 37 |                      |                      | and how                                                                             |             |
| 38 |                      |                      |                                                                                     |             |
| 39 |                      |                      |                                                                                     |             |
| 40 |                      |                      |                                                                                     |             |
| 41 | Blinding (masking):  | <a href="#">#17b</a> | If blinded, circumstances under which unblinding                                    | N/A due to  |
| 42 | emergency            |                      | is permissible, and procedure for revealing a                                       | consecutive |
| 43 | unblinding           |                      | participant's allocated intervention during the trial                               | enrollment  |
| 44 |                      |                      |                                                                                     |             |
| 45 |                      |                      |                                                                                     |             |
| 46 | Data collection plan | <a href="#">#18a</a> | Plans for assessment and collection of outcome,                                     | 9           |
| 47 |                      |                      | baseline, and other trial data, including any                                       |             |
| 48 |                      |                      | related processes to promote data quality (eg,                                      |             |
| 49 |                      |                      | duplicate measurements, training of assessors)                                      |             |
| 50 |                      |                      | and a description of study instruments (eg,                                         |             |
| 51 |                      |                      | questionnaires, laboratory tests) along with their                                  |             |
| 52 |                      |                      | reliability and validity, if known. Reference to                                    |             |
| 53 |                      |                      | where data collection forms can be found, if not                                    |             |
| 54 |                      |                      | in the protocol                                                                     |             |
| 55 |                      |                      |                                                                                     |             |
| 56 |                      |                      |                                                                                     |             |
| 57 |                      |                      |                                                                                     |             |
| 58 |                      |                      |                                                                                     |             |
| 59 |                      |                      |                                                                                     |             |
| 60 |                      |                      |                                                                                     |             |

|    |                      |                      |                                                    |     |
|----|----------------------|----------------------|----------------------------------------------------|-----|
| 1  | Data collection      | <a href="#">#18b</a> | Plans to promote participant retention and         | 13  |
| 2  | plan: retention      |                      | complete follow-up, including list of any outcome  |     |
| 3  |                      |                      | data to be collected for participants who          |     |
| 4  |                      |                      | discontinue or deviate from intervention protocols |     |
| 5  |                      |                      |                                                    |     |
| 6  |                      |                      |                                                    |     |
| 7  |                      |                      |                                                    |     |
| 8  | Data management      | <a href="#">#19</a>  | Plans for data entry, coding, security, and        | 11  |
| 9  |                      |                      | storage, including any related processes to        |     |
| 10 |                      |                      | promote data quality (eg, double data entry;       |     |
| 11 |                      |                      | range checks for data values). Reference to        |     |
| 12 |                      |                      | where details of data management procedures        |     |
| 13 |                      |                      | can be found, if not in the protocol               |     |
| 14 |                      |                      |                                                    |     |
| 15 |                      |                      |                                                    |     |
| 16 |                      |                      |                                                    |     |
| 17 | Statistics:          | <a href="#">#20a</a> | Statistical methods for analysing primary and      | 11  |
| 18 | outcomes             |                      | secondary outcomes. Reference to where other       |     |
| 19 |                      |                      | details of the statistical analysis plan can be    |     |
| 20 |                      |                      | found, if not in the protocol                      |     |
| 21 |                      |                      |                                                    |     |
| 22 |                      |                      |                                                    |     |
| 23 |                      |                      |                                                    |     |
| 24 | Statistics:          | <a href="#">#20b</a> | Methods for any additional analyses (eg,           | 11  |
| 25 | additional analyses  |                      | subgroup and adjusted analyses)                    |     |
| 26 |                      |                      |                                                    |     |
| 27 |                      |                      |                                                    |     |
| 28 | Statistics: analysis | <a href="#">#20c</a> | Definition of analysis population relating to      | -   |
| 29 | population and       |                      | protocol non-adherence (eg, as randomised          |     |
| 30 | missing data         |                      | analysis), and any statistical methods to handle   |     |
| 31 |                      |                      | missing data (eg, multiple imputation)             |     |
| 32 |                      |                      |                                                    |     |
| 33 |                      |                      |                                                    |     |
| 34 |                      |                      |                                                    |     |
| 35 | Data monitoring:     | <a href="#">#21a</a> | Composition of data monitoring committee           | 11  |
| 36 | formal committee     |                      | (DMC); summary of its role and reporting           |     |
| 37 |                      |                      | structure; statement of whether it is independent  |     |
| 38 |                      |                      | from the sponsor and competing interests; and      |     |
| 39 |                      |                      | reference to where further details about its       |     |
| 40 |                      |                      | charter can be found, if not in the protocol.      |     |
| 41 |                      |                      | Alternatively, an explanation of why a DMC is not  |     |
| 42 |                      |                      | needed                                             |     |
| 43 |                      |                      |                                                    |     |
| 44 |                      |                      |                                                    |     |
| 45 |                      |                      |                                                    |     |
| 46 |                      |                      |                                                    |     |
| 47 |                      |                      |                                                    |     |
| 48 | Data monitoring:     | <a href="#">#21b</a> | Description of any interim analyses and stopping   | N/A |
| 49 | interim analysis     |                      | guidelines, including who will have access to      |     |
| 50 |                      |                      | these interim results and make the final decision  |     |
| 51 |                      |                      | to terminate the trial                             |     |
| 52 |                      |                      |                                                    |     |
| 53 |                      |                      |                                                    |     |
| 54 |                      |                      |                                                    |     |
| 55 |                      |                      |                                                    |     |
| 56 |                      |                      |                                                    |     |
| 57 |                      |                      |                                                    |     |
| 58 |                      |                      |                                                    |     |
| 59 |                      |                      |                                                    |     |
| 60 |                      |                      |                                                    |     |

|    |                                      |                      |                                                                                                                                                                                                                                    |     |
|----|--------------------------------------|----------------------|------------------------------------------------------------------------------------------------------------------------------------------------------------------------------------------------------------------------------------|-----|
| 1  | Harms                                | <a href="#">#22</a>  | Plans for collecting, assessing, reporting, and managing solicited and spontaneously reported adverse events and other unintended effects of trial interventions or trial conduct                                                  | 11  |
| 2  |                                      |                      |                                                                                                                                                                                                                                    |     |
| 3  |                                      |                      |                                                                                                                                                                                                                                    |     |
| 4  |                                      |                      |                                                                                                                                                                                                                                    |     |
| 5  |                                      |                      |                                                                                                                                                                                                                                    |     |
| 6  |                                      |                      |                                                                                                                                                                                                                                    |     |
| 7  |                                      |                      |                                                                                                                                                                                                                                    |     |
| 8  | Auditing                             | <a href="#">#23</a>  | Frequency and procedures for auditing trial conduct, if any, and whether the process will be independent from investigators and the sponsor                                                                                        | N/A |
| 9  |                                      |                      |                                                                                                                                                                                                                                    |     |
| 10 |                                      |                      |                                                                                                                                                                                                                                    |     |
| 11 |                                      |                      |                                                                                                                                                                                                                                    |     |
| 12 |                                      |                      |                                                                                                                                                                                                                                    |     |
| 13 | Research ethics approval             | <a href="#">#24</a>  | Plans for seeking research ethics committee / institutional review board (REC / IRB) approval                                                                                                                                      | 3   |
| 14 |                                      |                      |                                                                                                                                                                                                                                    |     |
| 15 |                                      |                      |                                                                                                                                                                                                                                    |     |
| 16 |                                      |                      |                                                                                                                                                                                                                                    |     |
| 17 | Protocol amendments                  | <a href="#">#25</a>  | Plans for communicating important protocol modifications (eg, changes to eligibility criteria, outcomes, analyses) to relevant parties (eg, investigators, REC / IRBs, trial participants, trial registries, journals, regulators) | 3   |
| 18 |                                      |                      |                                                                                                                                                                                                                                    |     |
| 19 |                                      |                      |                                                                                                                                                                                                                                    |     |
| 20 |                                      |                      |                                                                                                                                                                                                                                    |     |
| 21 |                                      |                      |                                                                                                                                                                                                                                    |     |
| 22 |                                      |                      |                                                                                                                                                                                                                                    |     |
| 23 |                                      |                      |                                                                                                                                                                                                                                    |     |
| 24 |                                      |                      |                                                                                                                                                                                                                                    |     |
| 25 | Consent or assent                    | <a href="#">#26a</a> | Who will obtain informed consent or assent from potential trial participants or authorised surrogates, and how (see Item 32)                                                                                                       | 3   |
| 26 |                                      |                      |                                                                                                                                                                                                                                    |     |
| 27 |                                      |                      |                                                                                                                                                                                                                                    |     |
| 28 |                                      |                      |                                                                                                                                                                                                                                    |     |
| 29 |                                      |                      |                                                                                                                                                                                                                                    |     |
| 30 | Consent or assent: ancillary studies | <a href="#">#26b</a> | Additional consent provisions for collection and use of participant data and biological specimens in ancillary studies, if applicable                                                                                              | N/A |
| 31 |                                      |                      |                                                                                                                                                                                                                                    |     |
| 32 |                                      |                      |                                                                                                                                                                                                                                    |     |
| 33 |                                      |                      |                                                                                                                                                                                                                                    |     |
| 34 |                                      |                      |                                                                                                                                                                                                                                    |     |
| 35 |                                      |                      |                                                                                                                                                                                                                                    |     |
| 36 | Confidentiality                      | <a href="#">#27</a>  | How personal information about potential and enrolled participants will be collected, shared, and maintained in order to protect confidentiality before, during, and after the trial                                               | 11  |
| 37 |                                      |                      |                                                                                                                                                                                                                                    |     |
| 38 |                                      |                      |                                                                                                                                                                                                                                    |     |
| 39 |                                      |                      |                                                                                                                                                                                                                                    |     |
| 40 |                                      |                      |                                                                                                                                                                                                                                    |     |
| 41 |                                      |                      |                                                                                                                                                                                                                                    |     |
| 42 |                                      |                      |                                                                                                                                                                                                                                    |     |
| 43 | Declaration of interests             | <a href="#">#28</a>  | Financial and other competing interests for principal investigators for the overall trial and each study site                                                                                                                      | 13  |
| 44 |                                      |                      |                                                                                                                                                                                                                                    |     |
| 45 |                                      |                      |                                                                                                                                                                                                                                    |     |
| 46 |                                      |                      |                                                                                                                                                                                                                                    |     |
| 47 |                                      |                      |                                                                                                                                                                                                                                    |     |
| 48 | Data access                          | <a href="#">#29</a>  | Statement of who will have access to the final trial dataset, and disclosure of contractual agreements that limit such access for investigators                                                                                    | 11  |
| 49 |                                      |                      |                                                                                                                                                                                                                                    |     |
| 50 |                                      |                      |                                                                                                                                                                                                                                    |     |
| 51 |                                      |                      |                                                                                                                                                                                                                                    |     |
| 52 |                                      |                      |                                                                                                                                                                                                                                    |     |
| 53 |                                      |                      |                                                                                                                                                                                                                                    |     |
| 54 |                                      |                      |                                                                                                                                                                                                                                    |     |
| 55 | Ancillary and post trial care        | <a href="#">#30</a>  | Provisions, if any, for ancillary and post-trial care, and for compensation to those who suffer harm from trial participation                                                                                                      | 11  |
| 56 |                                      |                      |                                                                                                                                                                                                                                    |     |
| 57 |                                      |                      |                                                                                                                                                                                                                                    |     |
| 58 |                                      |                      |                                                                                                                                                                                                                                    |     |
| 59 |                                      |                      |                                                                                                                                                                                                                                    |     |
| 60 |                                      |                      |                                                                                                                                                                                                                                    |     |

|    |                       |                      |                                                       |    |
|----|-----------------------|----------------------|-------------------------------------------------------|----|
| 1  | Dissemination         | <a href="#">#31a</a> | Plans for investigators and sponsor to                | 3  |
| 2  | policy: trial results |                      | communicate trial results to participants,            |    |
| 3  |                       |                      | healthcare professionals, the public, and other       |    |
| 4  |                       |                      | relevant groups (eg, via publication, reporting in    |    |
| 5  |                       |                      | results databases, or other data sharing              |    |
| 6  |                       |                      | arrangements), including any publication              |    |
| 7  |                       |                      | restrictions                                          |    |
| 8  |                       |                      |                                                       |    |
| 9  |                       |                      |                                                       |    |
| 10 |                       |                      |                                                       |    |
| 11 |                       |                      |                                                       |    |
| 12 | Dissemination         | <a href="#">#31b</a> | Authorship eligibility guidelines and any intended    | 13 |
| 13 | policy: authorship    |                      | use of professional writers                           |    |
| 14 |                       |                      |                                                       |    |
| 15 |                       |                      |                                                       |    |
| 16 | Dissemination         | <a href="#">#31c</a> | Plans, if any, for granting public access to the full | 11 |
| 17 | policy: reproducible  |                      | protocol, participant-level dataset, and statistical  |    |
| 18 | research              |                      | code                                                  |    |
| 19 |                       |                      |                                                       |    |
| 20 |                       |                      |                                                       |    |
| 21 | Informed consent      | <a href="#">#32</a>  | Model consent form and other related                  | 3  |
| 22 | materials             |                      | documentation given to participants and               |    |
| 23 |                       |                      | authorised surrogates                                 |    |
| 24 |                       |                      |                                                       |    |
| 25 |                       |                      |                                                       |    |
| 26 |                       |                      |                                                       |    |
| 27 | Biological            | <a href="#">#33</a>  | Plans for collection, laboratory evaluation, and      | 9  |
| 28 | specimens             |                      | storage of biological specimens for genetic or        |    |
| 29 |                       |                      | molecular analysis in the current trial and for       |    |
| 30 |                       |                      | future use in ancillary studies, if applicable        |    |
| 31 |                       |                      |                                                       |    |
| 32 |                       |                      |                                                       |    |

33 The SPIRIT checklist is distributed under the terms of the Creative Commons Attribution License CC-  
 34 BY-ND 3.0. This checklist can be completed online using <https://www.goodreports.org/>, a tool made  
 35 by the [EQUATOR Network](#) in collaboration with [Penelope.ai](#)  
 36  
 37  
 38  
 39  
 40  
 41  
 42  
 43  
 44  
 45  
 46  
 47  
 48  
 49  
 50  
 51  
 52  
 53  
 54  
 55  
 56  
 57  
 58  
 59  
 60
